# Supplementary material for: GmSYP24, a putative syntaxin gene, confers osmotic/drought, salt stress tolerances and ABA signal pathway
Source: PubMed Central journal article supplement (PMC6461667; doi:10.1038/s41598-019-42332-5), 2019-04-12
Supplement: 41598_2019_42332_MOESM1_ESM.pdf [file 41598_2019_42332_MOESM1_ESM.pdf]

# ***GmSYP24*, a putative syntaxin gene, confers osmotic/drought, salt stress tolerances and ABA signal pathway**

Li-Miao Chen<sup>1,2</sup>, Yi-Sheng Fang<sup>1,2</sup>, Chan-Juan Zhang<sup>1,2</sup>, Qing-Nan Hao<sup>1,2</sup>, Dong Cao<sup>1,2</sup>, Song-Li Yuan<sup>1,2</sup>, Hai-Feng Chen<sup>1,2</sup>, Zhong-Lu Yang<sup>1,2</sup>, Shui-Lian Chen<sup>1,2</sup>, Zhi-HuiShan<sup>1,2</sup>, Bao-Hong Liu<sup>1,2</sup>, Jing-Wang<sup>1,2</sup>, Zhan Yong<sup>5</sup>, Xiao-Juan Zhang<sup>1,2</sup>, De-Zhen Qiu<sup>1,2</sup>, Wen-Bin Li<sup>3,4\*</sup>, Xin-An Zhou<sup>1,2\*</sup>

<sup>1</sup>Key Laboratory of Oil Crop Biology, Ministry of Agriculture, Wuhan, China 430062

<sup>2</sup>Oil Crops Research Institute of Chinese Academy of Agriculture Sciences, China 430062

<sup>3</sup>Key Laboratory of Soybean Biology in the Chinese Ministry of Education, Northeast Agricultural University, Harbin, China 150030

<sup>4</sup>Division of Soybean Breeding and Seed, Soybean Research & Development Center, CARS (Key Laboratory of Biology and Genetics & Breeding for Soybean in Northeast China, Ministry of Agriculture), China 150030

<sup>5</sup>Crop Research Institute, Xinjiang Academy of Agricultural and Reclamation Science, Key Lab of Cereal Quality Research and Genetic Improvement, Xinjiang Production and Construction Crops, 832000, China

## **\*Corresponding authors:**

Xin-An Zhou; Wen-Bin Li

Xin-An Zhou

Oil Crops Research Institute, Chinese Academy of Agriculture Sciences, Xudong 2nd Road, Wuhan, China 430062

Phone/FAX: 86-027-86711563

Email: [zhouocri@sina.com](mailto:zhouocri@sina.com)

Wen-Bin Li

Northeast Agricultural University, Key Laboratory of Soybean Biology in the Chinese Ministry of Education, 600 Changjiang Road, Harbin, China 150030

Phone/ FAX: 86-0451-55190778

Email: [wenbinli@yahoo.com](mailto:wenbinli@yahoo.com)

## Supporting Information

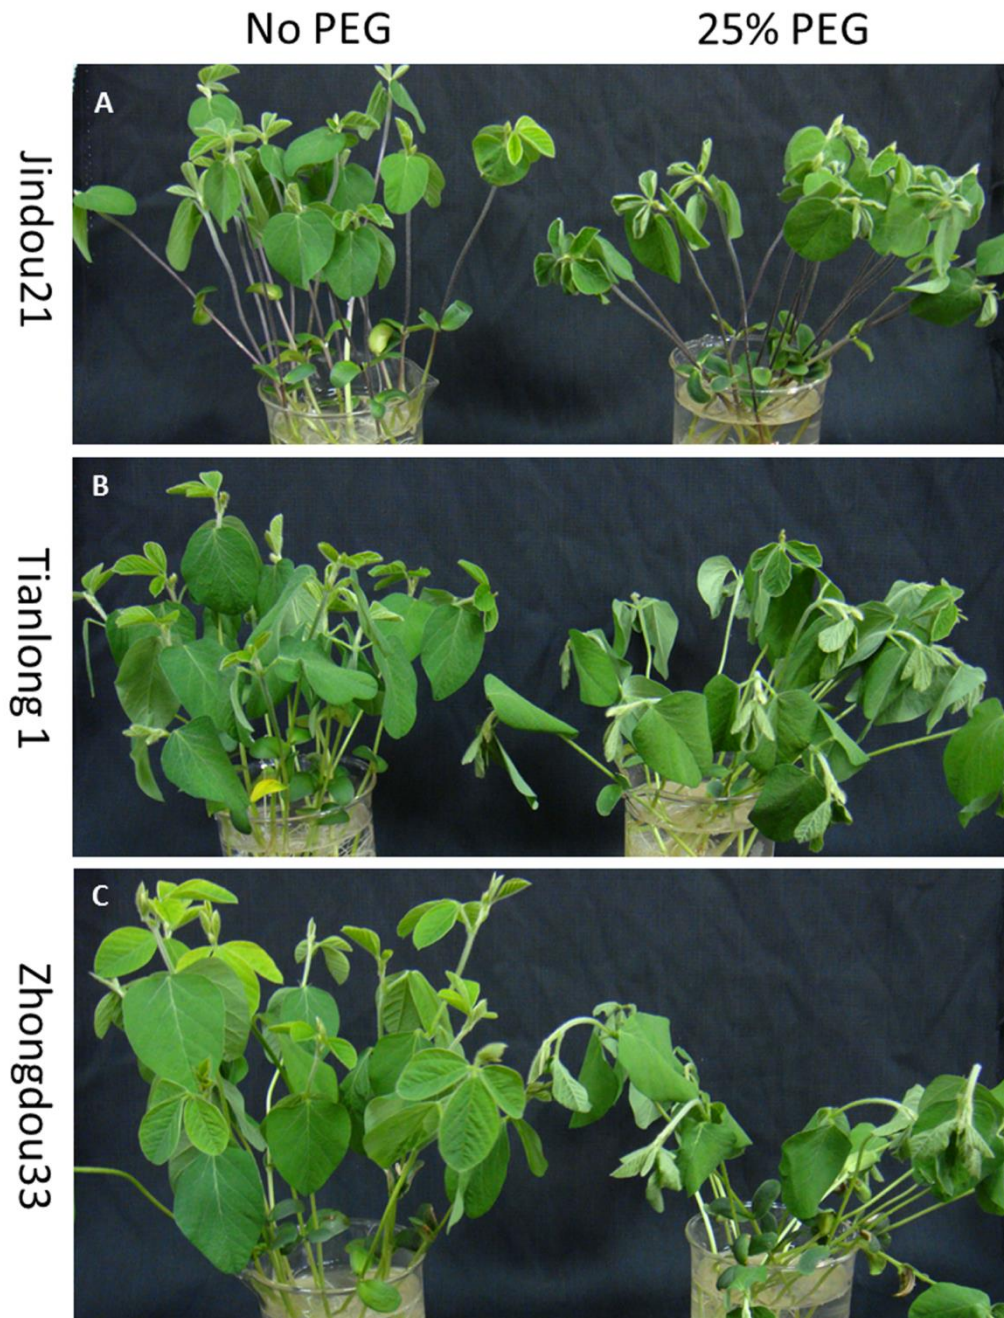

**Figure S1.** The phenotype of Jindou21, Tianlong1 and Zhongdou33 under 25% PEG or not. (A) Jindou21, (B) Tianlong1, (C) Zhongdou33.

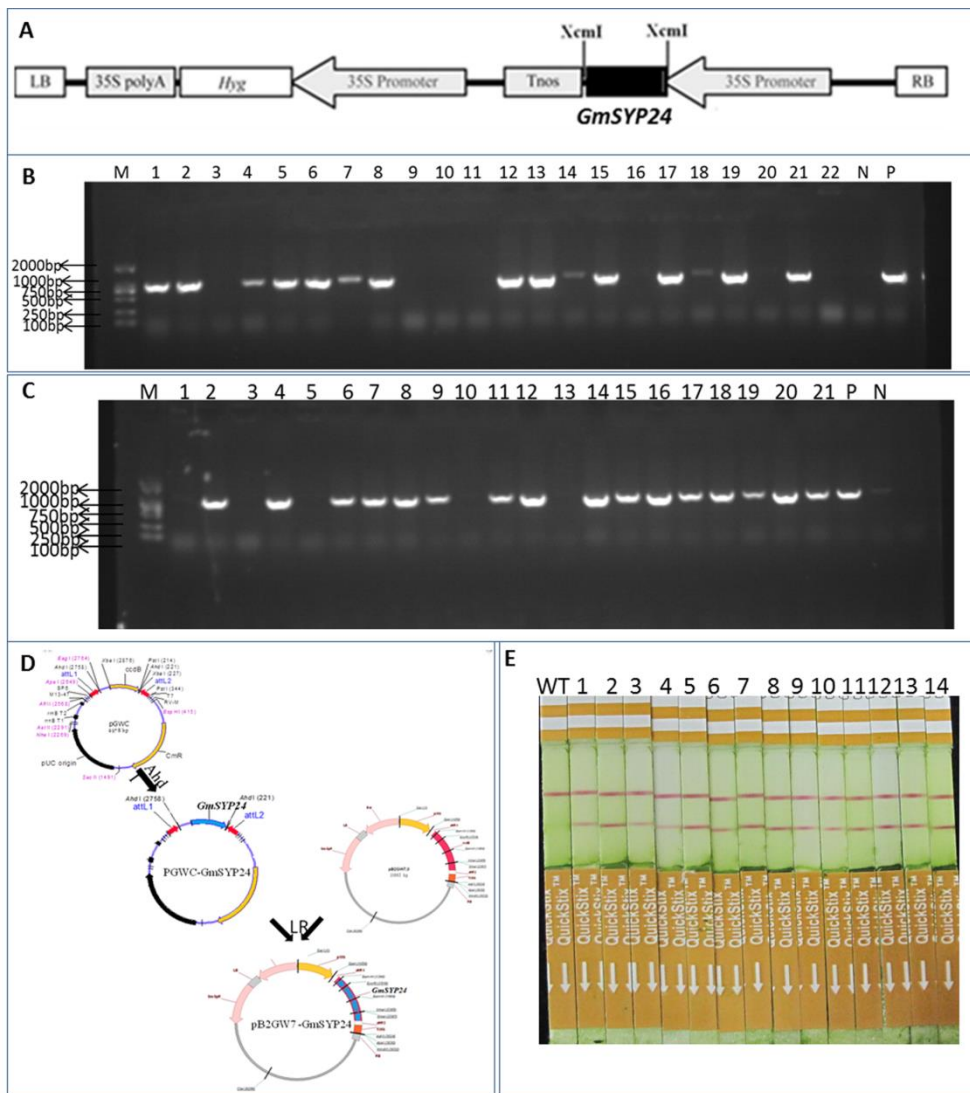

**Figure S2.** The construction of plant expression vector and molecular detection of transgenic plants. (A) The construct of *GmSYP24* into the pCXSN vector to transform *Arabidopsis*. (B) The amplification of *GmSYP24* in transgenic *Arabidopsis* plants. M: 2000 maker; 1-22: transgenic plants; N: negative control; P: positive control. The length of amplified fragment is 775bp (including CDS full-length of *GmSYP24*). (C) The amplification of *GmSYP24* in transgenic soybean plants. M: 2000 maker; 1-21: transgenic plants; P: positive control; N: negative control. The length of amplified fragment is 775bp (including CDS full-length of *GmSYP24*). (D) The construct of *GmSYP24* into the pB2GW7 vector to transform soybean. (E) The Bar protein detection in transgenic soybean of *GmSYP24ox*. WT: wild type plants (negative control); 1-14: transgenic positive plants.

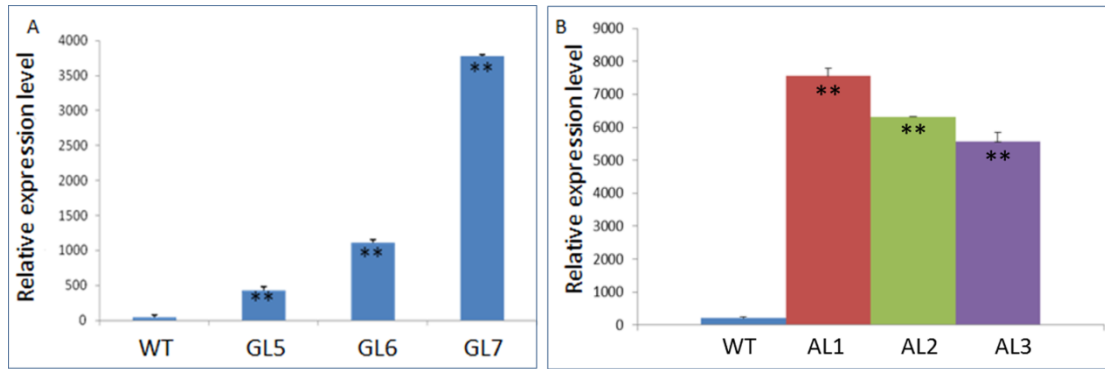

**Figure S3.** The expression analysis of *GmSYP24* in wild type and three transgenic lines of soybean (A) and Arabidopsis (B). Total RNA was isolated from the leave of greenhouse grown plants. The keephouse gene actin was employed as an internal control. The expression level of these genes in the leave of WT was set to 1. Error bars represent the SDs from three biological replicates. \*\* indicate significant differences in comparison to WT at  $P < 0.01$ .

**Table S1.** LEA2 family genes of soybean were list.

| Gene name | Locus name<br>(version Glyma2.0) | the number<br>of LEA2<br>domain | GenBank<br>Accession No.     | Genome<br>Location      | The annotation<br>of Arabidopsis<br>homologous genes                                     | Peptide<br>Length | genome<br>sequence | pI    | Mw<br>(KD) |
|-----------|----------------------------------|---------------------------------|------------------------------|-------------------------|------------------------------------------------------------------------------------------|-------------------|--------------------|-------|------------|
| GmLEA2-1  | Glyma.01G152600                  | 1                               | <a href="#">XM_003516456</a> | Chr01:48960693-48961382 | AT5G45320.1(molecular_function unknown)                                                  | 229               | 690                | 8.95  | 25.82      |
| GmLEA2-2  | Glyma.01G222800                  | 1                               | XM_006573731                 | Chr01:55174239-55175109 | AT1G64065.1(Late embryogenesis abundant (LEA) hydroxyproline-rich glycoprotein family)   | 184               | 871                | 10.24 | 20.34      |
| GmLEA2-3  | Glyma.01G226100                  | 1                               |                              | Chr01:55470092-55471377 | AT1G64450.1(Glycine-rich protein family)                                                 | 209               | 1286               | 9.51  | 23.09      |
| GmLEA2-4  | Glyma.01G240600                  | 1                               |                              | Chr01:56444294-56444830 | AT4G05220.1(Late embryogenesis abundant (LEA) hydroxyproline-rich glycoprotein family)   | 178               | 537                | 5.2   | 19.90      |
| GmLEA2-5  | Glyma.02G197600                  | 1                               | XM_003519073                 | Chr02:37639021-37640558 | AT3G11660.1(NDR1/HIN1-like 1)                                                            | 207               | 1538               | 9.79  | 23.92      |
| GmLEA2-6  | Glyma.02G197800                  | 1                               | XM_003519074                 | Chr02:37686736-37687986 | AT3G11650.1(NDR1/HIN1-like 2, SYNTAXIN )                                                 | 244               | 1251               | 9.26  | 27.63      |
| GmLEA2-7  | Glyma.02G239100                  | 1                               | NM_001252948                 | Chr02:42754798-42755899 | AT1G65690.1(Late embryogenesis abundant (LEA) hydroxyproline-rich glycoprotein family)   | 255               | 1102               | 10.12 | 28.77      |
| GmLEA2-8  | Glyma.02G274400                  | 1                               | XM_003519436                 | Chr02:45751520-45753085 | AT2G27080.1( Late embryogenesis abundant (LEA) hydroxyproline-rich glycoprotein family ) | 273               | 1566               | 9.81  | 30.50      |
| GmLEA2-9  | Glyma.02G277300                  | 2                               | XM_006574374                 | Chr02:46010712-46013329 | AT2G44060.1( Late embryogenesis abundant protein, group 2 )                              | 321               | 2618               | 4.85  | 35.82      |

|           |                 |   |              |                         |                                                                                                     |     |      |      |       |
|-----------|-----------------|---|--------------|-------------------------|-----------------------------------------------------------------------------------------------------|-----|------|------|-------|
| GmLEA2-10 | Glyma.02G303100 | 1 |              | Chr02:47852657-47854573 | AT4G26490.1( Late embryogenesis abundant (LEA) hydroxyproline-rich glycoprotein family )            | 236 | 1917 | 9.96 | 26.70 |
| GmLEA2-11 | Glyma.03G000800 | 1 | XM_003521561 | Chr03:113864-115495     | AT3G54200.1 ( Late embryogenesis abundant (LEA) hydroxyproline-rich glycoprotein family )           | 192 | 1632 | 9.17 | 20.47 |
| GmLEA2-12 | Glyma.03G201000 | 1 | XM_003521442 | Chr03:40968934-40970257 | AT2G35980.1 ( Late embryogenesis abundant (LEA) hydroxyproline-rich glycoprotein family, syntaxin ) | 221 | 1324 | 9.58 | 24.94 |
| GmLEA2-13 | Glyma.03G201100 | 1 | NM_001253965 | Chr03:40972049-40972976 | AT2G35980.1(Late embryogenesis abundant (LEA) hydroxyproline-rich glycoprotein family,SYNTAXIN)     | 227 | 928  | 9.31 | 26.34 |
| GmLEA2-14 | Glyma.03G201200 | 1 | XM_003520665 | Chr03:40977183-40977806 | AT2G35980.1(Late embryogenesis abundant (LEA) hydroxyproline-rich glycoprotein family,SYNTAXIN)     | 207 | 624  | 9.46 | 24.14 |
| GmLEA2-15 | Glyma.03G201300 | 1 |              | Chr03:40980745-40990121 | AT2G35980.1(Late embryogenesis abundant (LEA) hydroxyproline-rich glycoprotein family,SYNTAXIN)     | 243 | 9377 | 9.22 | 26.77 |
| GmLEA2-16 | Glyma.03G201500 | 1 | XM_003521445 | Chr03:40986155-40987233 | AT2G35980.1(Late embryogenesis abundant (LEA) hydroxyproline-rich glycoprotein family,SYNTAXIN)     | 229 | 1079 | 9.92 | 28.67 |
| GmLEA2-17 | Glyma.03G201600 | 1 | XM_006577032 | Chr03:40993013-40994536 | AT3G11660.1 ( NDR1/HIN1-like 1)                                                                     | 252 | 1524 | 9.83 | 21.56 |
| GmLEA2-18 | Glyma.03G261400 | 1 | XM_003521778 | Chr03:45488450-45489586 | AT4G01410.1( Late embryogenesis abundant (LEA) hydroxyproline-rich glycoprotein family )            | 197 | 1137 | 9.66 | 27.86 |
| GmLEA2-19 | Glyma.03G263800 | 1 |              | Chr03:45666942-45667919 | AT2G01080.1 (Late embryogenesis                                                                     | 185 | 978  | 8.88 | 21.09 |

|           |                 |   |              |                          |                                                                                        |     |      |       |       |
|-----------|-----------------|---|--------------|--------------------------|----------------------------------------------------------------------------------------|-----|------|-------|-------|
|           |                 |   |              |                          | abundant (LEA) hydroxyproline-rich glycoprotein family)                                |     |      |       |       |
| GmLEA2-20 | Glyma.04G051600 | 1 | XM_003522201 | Chr04:4179782-4181288    | AT5G11890.1(molecular_function unknown)                                                | 256 | 1507 | 9.87  | 28.23 |
| GmLEA2-21 | Glyma.04G103700 | 1 | XM_003523778 | Chr04:9701112-9702592    | AT2G27080.1(Late embryogenesis abundant (LEA) hydroxyproline-rich glycoprotein family) | 255 | 1481 | 9.51  | 28.41 |
| GmLEA2-22 | Glyma.04G228200 | 1 |              | Chr04:49753281-49754534  | AT5G53730.1(Late embryogenesis abundant (LEA) hydroxyproline-rich glycoprotein family) | 210 | 1254 | 9.69  | 23.26 |
| GmLEA2-23 | Glyma.05G094300 | 1 | XM_003525763 | Chr05:23964664-23966589  | AT1G45688.1(molecular_function unknown)                                                | 324 | 1926 | 10.06 | 35.72 |
| GmLEA2-24 | Glyma.05G179200 | 1 | XM_006580216 | Chr05:36725007-36725747  | AT2G27080.1(Late embryogenesis abundant (LEA) hydroxyproline-rich glycoprotein family) | 246 | 741  | 8.82  | 26.90 |
| GmLEA2-25 | Glyma.05G212600 | 1 | XM_003525320 | Chr05:39412222-39413348  | AT2G46150.1(Late embryogenesis abundant (LEA) hydroxyproline-rich glycoprotein family) | 224 | 1127 | 9.28  | 24.80 |
| GmLEA2-26 | Glyma.05G217500 | 1 | XM_003525294 | Chr05:39757555-39758761  | AT1G64450.1(Glycine-rich protein family)                                               | 213 | 1207 | 9.54  | 22.97 |
| GmLEA2-27 | Glyma.05G242600 | 1 | XM_003525161 | Chr05:41753113- 41754953 | AT1G45688.1(molecular_function unknown)                                                | 294 | 1841 | 9.98  | 32.78 |
| GmLEA2-28 | Glyma.06G052400 | 1 | XM_003525960 | Chr06:3947109-3948444    | AT5G11890.1(molecular_function unknown)                                                | 256 | 1336 | 9.87  | 28.11 |
| GmLEA2-29 | Glyma.06G104900 | 1 | XM_003527865 | Chr06:8383654-8384433    | AT2G27080.1 (Late embryogenesis abundant (LEA) hydroxyproline-rich                     | 259 | 780  | 9.04  | 28.59 |

|           |                 |   |              |                         |                                                                                                     |     |      |      |       |
|-----------|-----------------|---|--------------|-------------------------|-----------------------------------------------------------------------------------------------------|-----|------|------|-------|
|           |                 |   |              |                         | glycoprotein family )                                                                               |     |      |      |       |
| GmLEA2-30 | Glyma.06G136700 | 1 | XM_006580863 | Chr06:11191691-11193555 | AT5G53730.1 ( Late embryogenesis abundant (LEA) hydroxyproline-rich glycoprotein family )           | 223 | 1865 | 9.1  | 25.41 |
| GmLEA2-31 | Glyma.06G303300 | 1 |              | Chr06:49275774-49276891 | AT3G54200.1 ( Late embryogenesis abundant (LEA) hydroxyproline-rich glycoprotein family )           | 227 | 1118 | 9.65 | 25.10 |
| GmLEA2-32 | Glyma.07G009700 | 1 | XM_006582950 | Chr07:728460-730026     | AT1G17620.1 ( Late embryogenesis abundant (LEA) hydroxyproline-rich glycoprotein family )           | 254 | 1567 | 9.68 | 28.02 |
| GmLEA2-33 | Glyma.07G049300 | 1 |              | Chr07:4196836-4197585   | AT4G01410.1 ( Late embryogenesis abundant (LEA) hydroxyproline-rich glycoprotein family )           | 249 | 750  | 9.56 | 27.80 |
| GmLEA2-34 | Glyma.07G084600 | 1 | XM_003528883 | Chr07:7793897-7796474   | AT1G45688.1(molecular_function unknown)                                                             | 308 | 2578 | 9.51 | 33.71 |
| GmLEA2-35 | Glyma.07G087000 | 1 |              | Chr07:8053652-8055911   | AT4G13270.1 ( Late embryogenesis abundant (LEA) hydroxyproline-rich glycoprotein family )           | 163 | 2260 | 9.07 | 18.36 |
| GmLEA2-36 | Glyma.07G099500 | 1 | XM_003528914 | Chr07:9419717-9422235   | AT1G45688.1(molecular_function unknown)                                                             | 297 | 2519 | 9.93 | 32.80 |
| GmLEA2-37 | Glyma.07G103700 | 1 | XM_003528941 | Chr07:9969632-9970849   | AT2G35980.1 ( Late embryogenesis abundant (LEA) hydroxyproline-rich glycoprotein family, syntaxin ) | 205 | 1218 | 9.67 | 23.52 |
| GmLEA2-38 | Glyma.07G103800 | 1 | XM_006583406 | Chr07:9985288-9986135   | AT2G35980.1(Late embryogenesis abundant (LEA) hydroxyproline-rich glycoprotein family,SYNTAXIN)     | 209 | 848  | 9.43 | 24.11 |



|           |                 |   |              |                         |                                                                                                 |     |      |       |       |
|-----------|-----------------|---|--------------|-------------------------|-------------------------------------------------------------------------------------------------|-----|------|-------|-------|
| GmLEA2-39 | Glyma.07G103900 | 1 | XM_003530019 | Chr07:9990878-9991757   | AT2G35980.1(Late embryogenesis abundant (LEA) hydroxyproline-rich glycoprotein family,SYNTAXIN) | 207 | 880  | 9.8   | 24.12 |
| GmLEA2-40 | Glyma.08G019000 | 1 | NM_001249306 | Chr08:1549130-1550331   | AT2G46150.1(Late embryogenesis abundant (LEA) hydroxyproline-rich glycoprotein family)          | 226 | 1202 | 8.98  | 24.72 |
| GmLEA2-41 | Glyma.08G023500 | 1 | XM_003532388 | Chr08:1873670-1874780   | AT1G64450.1(Glycine-rich protein family)                                                        | 209 | 1111 | 9.54  | 22.50 |
| GmLEA2-42 | Glyma.08G077900 | 1 | XM_003532583 | Chr08:5920205-5925896   | AT2G01080.1( Late embryogenesis abundant (LEA) hydroxyproline-rich glycoprotein family )        | 226 | 5692 | 9.38  | 24.70 |
| GmLEA2-43 | Glyma.08G136900 | 1 | XM_006586319 | Chr08:10465850-10466602 | AT2G27080.1(Late embryogenesis abundant (LEA) hydroxyproline-rich glycoprotein family)          | 250 | 753  | 9.07  | 27.08 |
| GmLEA2-44 | Glyma.08G184000 | 1 | XM_003532927 | Chr08:14749219-14752814 | AT2G01080.1(Late embryogenesis abundant (LEA) hydroxyproline-rich glycoprotein family)          | 253 | 3596 | 9.66  | 27.33 |
| GmLEA2-45 | Glyma.09G071900 | 1 | XM_003534908 | Chr09:7418618-7419205   | AT3G54200.1( Late embryogenesis abundant (LEA) hydroxyproline-rich glycoprotein family )        | 195 | 588  | 9.21  | 21.27 |
| GmLEA2-46 | Glyma.09G179400 | 1 | XM_006587421 | Chr09:40412865-40415233 | AT1G45688.1(molecular_function unknown)                                                         | 297 | 2369 | 10.06 | 32.82 |
| GmLEA2-47 | Glyma.09G189900 | 1 | XM_003534146 | Chr09:41452904-41455957 | AT4G13270.1(Late embryogenesis abundant (LEA) hydroxyproline-rich glycoprotein family)          | 257 | 3054 | 6.73  | 28.81 |
| GmLEA2-48 | Glyma.09G192300 | 1 | XM_003534159 | Chr09:41692753-41695528 | AT1G45688.1(molecular_function                                                                  | 314 | 2776 | 9.82  | 34.58 |

|           |                 |   |              |                         |                                                                                                 |     |      |       |       |
|-----------|-----------------|---|--------------|-------------------------|-------------------------------------------------------------------------------------------------|-----|------|-------|-------|
|           |                 |   |              |                         | unknown)                                                                                        |     |      |       |       |
| GmLEA2-49 | Glyma.09G217800 | 1 | XM_003533428 | Chr09:44083696-44084349 | AT5G45320.1(molecular_function unknown)                                                         | 217 | 654  | 9.97  | 24.37 |
| GmLEA2-50 | Glyma.10G079400 | 1 | XM_003537055 | Chr10:9086412-9087146   | AT3G11650.1( NDR1/HIN1-like 2 ,syntaxin)                                                        | 244 | 735  | 9.09  | 27.57 |
| GmLEA2-51 | Glyma.10G079900 | 1 | XM_003535760 | Chr10:9245085-9246282   | AT2G35980.1(Late embryogenesis abundant (LEA) hydroxyproline-rich glycoprotein family,SYNTAXIN) | 227 | 1198 | 9.64  | 26.25 |
| GmLEA2-52 | Glyma.10G080000 | 1 | XM_003535761 | Chr10:9258476-9260697   | AT3G11660.1(NDR1/HIN1-like 1)                                                                   | 209 | 2222 | 9.64  | 26.25 |
| GmLEA2-53 | Glyma.10G174100 | 1 | XM_003536133 | Chr10:40785837-40786595 | AT5G36970.1(NDR1/HIN1-like 25)                                                                  | 252 | 759  | 10.02 | 24.00 |
| GmLEA2-54 | Glyma.10G252500 | 1 | XM_003536512 | Chr10:48034926-48035710 | AT4G05220.1(Late embryogenesis abundant (LEA) hydroxyproline-rich glycoprotein family)          | 227 | 785  | 9.56  | 26.04 |
| GmLEA2-55 | Glyma.11G003000 | 1 |              | Chr11:188906-189478     | AT3G20600.1( Late embryogenesis abundant (LEA) hydroxyproline-rich glycoprotein family )        | 190 | 573  | 9.71  | 21.64 |
| GmLEA2-56 | Glyma.11G020500 | 1 |              | Chr11:1450017-1450631   | AT1G64065.1(Late embryogenesis abundant (LEA) hydroxyproline-rich glycoprotein family)          | 204 | 615  | 9.74  | 22.98 |
| GmLEA2-57 | Glyma.11G020600 | 1 | XM_006591461 | Chr11:1453020-1453553   | AT1G64065.1(Late embryogenesis abundant (LEA) hydroxyproline-rich glycoprotein family)          | 177 | 534  | 9.87  | 19.66 |
| GmLEA2-58 | Glyma.11G097100 | 1 | XM_003537704 | Chr11:7411891-7415860   | AT2G41990.1(molecular_function unknown)                                                         | 321 | 3970 | 9.63  | 36.32 |
| GmLEA2-59 | Glyma.11G179900 | 1 | XM_003538046 | Chr11:24548259-24549398 | AT3G44220.1( Late embryogenesis abundant (LEA) hydroxyproline-rich                              | 214 | 1140 | 9.96  | 23.59 |

|           |                 |   |              |                         |                                                                                          |     |      |       |       |
|-----------|-----------------|---|--------------|-------------------------|------------------------------------------------------------------------------------------|-----|------|-------|-------|
|           |                 |   |              |                         | glycoprotein family )                                                                    |     |      |       |       |
| GmLEA2-60 | Glyma.11G182400 | 1 | XM_003538062 | Chr11:24988921-24993379 | AT3G44380.1(Late embryogenesis abundant (LEA) hydroxyproline-rich glycoprotein family)   | 191 | 4459 | 6.17  | 20.94 |
| GmLEA2-61 | Glyma.11G199600 | 1 | XM_006591204 | Chr11:27769806-27772081 | AT2G30505.1(Late embryogenesis abundant (LEA) hydroxyproline-rich glycoprotein family)   | 249 | 2276 | 8.88  | 27.63 |
| GmLEA2-62 | Glyma.11G203000 | 1 | XM_003538305 | Chr11:28357079-28358465 | AT1G65690.1(Late embryogenesis abundant (LEA) hydroxyproline-rich glycoprotein family)   | 246 | 1387 | 10.03 | 28.18 |
| GmLEA2-63 | Glyma.12G023200 | 1 |              | Chr12:1701710-1704543   | AT2G41990.1(molecular_function unknown)                                                  | 343 | 2766 | 9.8   | 38.70 |
| GmLEA2-64 | Glyma.12G093600 | 1 | XM_003539797 | Chr12:7654387-7659033   | AT3G44220.1( Late embryogenesis abundant (LEA) hydroxyproline-rich glycoprotein family ) | 213 | 4647 | 9.96  | 23.56 |
| GmLEA2-65 | Glyma.12G187600 | 1 | XM_006592709 | Chr12:34865817-34869986 | AT3G44220.1( Late embryogenesis abundant (LEA) hydroxyproline-rich glycoprotein family ) | 221 | 4170 | 9.34  | 24.63 |
| GmLEA2-66 | Glyma.12G194700 | 1 | XM_003539456 | Chr12:35653530-35654090 | AT2G46150.1(Late embryogenesis abundant (LEA) hydroxyproline-rich glycoprotein family)   | 186 | 561  | 8.42  | 20.54 |
| GmLEA2-67 | Glyma.12G202900 | 1 |              | Chr12:36333664-36334359 | AT1G65690.1(Late embryogenesis abundant (LEA) hydroxyproline-rich glycoprotein family)   | 166 | 696  | 8.88  | 18.60 |
| GmLEA2-68 | Glyma.13G000500 | 1 |              | Chr13:154446-155404     | AT3G54200.1( Late embryogenesis abundant (LEA) hydroxyproline-rich                       | 207 | 959  | 9.23  | 22.14 |

|           |                 |   |              |                         |                                                                                          |     |      |       |       |
|-----------|-----------------|---|--------------|-------------------------|------------------------------------------------------------------------------------------|-----|------|-------|-------|
|           |                 |   |              |                         | glycoprotein family )                                                                    |     |      |       |       |
| GmLEA2-69 | Glyma.13G248600 | 1 | XM_003541708 | Chr13:35666896-35668024 | AT5G22870.1(Late embryogenesis abundant (LEA) hydroxyproline-rich glycoprotein family)   | 203 | 1129 | 9.71  | 23.25 |
| GmLEA2-70 | Glyma.13G298800 | 1 | XM_006595387 | Chr13:39723376-39724074 | AT1G65690.1(Late embryogenesis abundant (LEA) hydroxyproline-rich glycoprotein family)   | 232 | 699  | 7.93  | 26.32 |
| GmLEA2-71 | Glyma.13G307700 | 1 | XM_003541896 | Chr13:40333363-40333923 | AT2G46150.1(Late embryogenesis abundant (LEA) hydroxyproline-rich glycoprotein family)   | 186 | 561  | 7.93  | 26.32 |
| GmLEA2-72 | Glyma.13G307900 | 1 |              | Chr13:40339771-40340331 | AT2G46150.1(Late embryogenesis abundant (LEA) hydroxyproline-rich glycoprotein family)   | 186 | 561  | 9.03  | 20.37 |
| GmLEA2-73 | Glyma.13G313600 | 1 | XM_003543371 | Chr13:40891153-40892294 | AT2G27260.1( Late embryogenesis abundant (LEA) hydroxyproline-rich glycoprotein family ) | 271 | 1142 | 10.01 | 30.00 |
| GmLEA2-74 | Glyma.13G313700 | 1 | XM_003543372 | Chr13:40902956-40904226 | AT3G44220.1( Late embryogenesis abundant (LEA) hydroxyproline-rich glycoprotein family ) | 218 | 1271 | 9.36  | 24.01 |
| GmLEA2-75 | Glyma.13G349900 | 1 | XM_003543546 | Chr13:43954196-43955906 | AT1G17620.1(Late embryogenesis abundant (LEA) hydroxyproline-rich glycoprotein family)   | 254 | 1711 | 10.24 | 27.84 |
| GmLEA2-76 | Glyma.13G357600 | 1 |              | Chr13:44542513-44544526 | AT1G45688.1(molecular_function unknown)                                                  | 302 | 2014 | 9.62  | 33.33 |
| GmLEA2-77 | Glyma.13G359200 | 1 | XM_006595073 | Chr13:44651121-44653243 | AT1G52330.1(Late embryogenesis abundant (LEA) hydroxyproline-rich                        | 201 | 2123 | 10.06 | 22.71 |

|           |                 |   |              |                         |                                                                                                 |     |      |       |       |
|-----------|-----------------|---|--------------|-------------------------|-------------------------------------------------------------------------------------------------|-----|------|-------|-------|
|           |                 |   |              |                         | glycoprotein family)                                                                            |     |      |       |       |
| GmLEA2-78 | Glyma.14G010800 | 1 | XM_003545035 | Chr14:824392-825474     | AT4G26490.1( Late embryogenesis abundant (LEA) hydroxyproline-rich glycoprotein family )        | 230 | 1083 | 9.85  | 26.19 |
| GmLEA2-79 | Glyma.14G037300 | 2 | NM_001254648 | Chr14:2808746-2811889   | AT2G44060.1( Late embryogenesis abundant protein, group 2 )                                     | 320 | 3144 | 4.8   | 35.65 |
| GmLEA2-80 | Glyma.14G041700 | 1 | XM_003545437 | Chr14:3150091-3152649   | AT2G27080.1( Late embryogenesis abundant (LEA) hydroxyproline-rich glycoprotein family )        | 273 | 2559 | 9.65  | 30.38 |
| GmLEA2-81 | Glyma.14G160000 | 1 |              | Chr14:36711633-36712196 | AT3G54200.1( Late embryogenesis abundant (LEA) hydroxyproline-rich glycoprotein family )        | 187 | 564  | 9.39  | 20.81 |
| GmLEA2-82 | Glyma.14G208000 | 1 | XM_003544903 | Chr14:47379161-47380263 | AT1G65690.1(Late embryogenesis abundant (LEA) hydroxyproline-rich glycoprotein family,SYNTAXIN) | 260 | 1103 | 10.15 | 29.48 |
| GmLEA2-83 | Glyma.15G015800 | 1 | NM_001254412 | Chr15:1250483-1253447   | AT1G45688.1(molecular_function unknown)                                                         | 309 | 2965 | 9.95  | 34.24 |
| GmLEA2-84 | Glyma.15G024400 | 1 | XM_006597127 | Chr15:1962152-1963820   | AT1G17620.1(Late embryogenesis abundant (LEA) hydroxyproline-rich glycoprotein family)          | 254 | 1669 | 10.28 | 27.92 |
| GmLEA2-85 | Glyma.15G048800 | 1 | XM_003547015 | Chr15:3852038-3855379   | AT2G01080.1(Late embryogenesis abundant (LEA) hydroxyproline-rich glycoprotein family)          | 260 | 3342 | 9.66  | 27.89 |
| GmLEA2-86 | Glyma.15G065400 | 1 | XM_003545751 | Chr15:4971607-4972756   | AT5G22870.1(Late embryogenesis abundant (LEA) hydroxyproline-rich glycoprotein family)          | 203 | 1150 | 9.62  | 23.24 |

|           |                 |   |              |                         |                                                                                          |     |      |       |       |
|-----------|-----------------|---|--------------|-------------------------|------------------------------------------------------------------------------------------|-----|------|-------|-------|
| GmLEA2-87 | Glyma.16G031000 | 1 | XM_003548573 | Chr16:2934876-2936089   | AT2G46150.1(Late embryogenesis abundant (LEA) hydroxyproline-rich glycoprotein family)   | 219 | 1214 | 10.2  | 24.19 |
| GmLEA2-88 | Glyma.16G031300 | 1 | NM_001251006 | Chr16:2949165-2950467   | AT1G01470.1(Late embryogenesis abundant protein)                                         | 152 | 1303 | 5.16  | 16.69 |
| GmLEA2-89 | Glyma.16G221900 | 1 | XM_003548290 | Chr16:37848866-37850458 | AT3G54200.1( Late embryogenesis abundant (LEA) hydroxyproline-rich glycoprotein family ) | 192 | 1593 | 9.3   | 20.54 |
| GmLEA2-90 | Glyma.17G172900 | 1 | XM_003550013 | Chr17:17752933-17754945 | AT1G45688.1(molecular_function unknown)                                                  | 323 | 2013 | 10.01 | 35.52 |
| GmLEA2-91 | Glyma.18G047800 | 1 | XM_003553105 | Chr18:4153739-4154925   | AT1G65690.1(Late embryogenesis abundant (LEA) hydroxyproline-rich glycoprotein family)   | 244 | 1187 | 9.97  | 27.86 |
| GmLEA2-92 | Glyma.18G073200 | 1 | XM_003552938 | Chr18:6901495-6902707   | AT4G26490.1( Late embryogenesis abundant (LEA) hydroxyproline-rich glycoprotein family ) | 258 | 1213 | 10.05 | 29.48 |
| GmLEA2-93 | Glyma.18G218700 | 1 |              | Chr18:50553919-50555110 | AT3G05975.1(Late embryogenesis abundant (LEA) hydroxyproline-rich glycoprotein family)   | 221 | 1192 | 9.83  | 24.28 |
| GmLEA2-94 | Glyma.18G218800 | 1 | XM_003551579 | Chr18:50556074-50559120 | AT3G54200.1( Late embryogenesis abundant (LEA) hydroxyproline-rich glycoprotein family ) | 196 | 3047 | 8.6   | 21.38 |
| GmLEA2-95 | Glyma.18G238700 | 1 |              | Chr18:52756503-52759147 | AT1G01470.1(Late embryogenesis abundant protein)                                         | 176 | 1617 | 5.83  | 18.93 |
| GmLEA2-96 | Glyma.19g198600 | 1 |              | Chr19:45575608-45576562 | AT2G35980.1(Late embryogenesis abundant (LEA) hydroxyproline-rich                        | 216 | 955  | 9.63  | 24.48 |

|            |                                         |   |              |                         |                                                                                                     |     |      |      |       |
|------------|-----------------------------------------|---|--------------|-------------------------|-----------------------------------------------------------------------------------------------------|-----|------|------|-------|
|            |                                         |   |              |                         | glycoprotein family,SYNTAXIN)                                                                       |     |      |      |       |
| GmLEA2-97  | Glyma.19G198700                         | 1 | NM_001252717 | Chr19:45578902-45579788 | AT2G35980.1(Late embryogenesis abundant (LEA) hydroxyproline-rich glycoprotein family,SYNTAXIN)     | 227 | 887  | 9.34 | 26.41 |
| GmLEA2-98  | Glyma.19G198800                         | 1 | XM_003554413 | Chr19:45582865-45583763 | AT2G35980.1 ( Late embryogenesis abundant (LEA) hydroxyproline-rich glycoprotein family, syntaxin ) | 227 | 899  | 9.34 | 26.43 |
| GmLEA2-99  | Glyma.19G198900                         | 1 |              | Chr19:45588629-45590084 | AT3G11660.1 ( NDR1/HIN1-like 1)                                                                     | 210 | 1456 | 9.81 | 23.91 |
| GmLEA2-100 | Glyma.19G260500                         | 1 | XM_003554739 | Chr19:50373544-50374912 | AT4G01410.1 ( Late embryogenesis abundant (LEA) hydroxyproline-rich glycoprotein family )           | 197 | 1369 | 9.89 | 21.54 |
| GmLEA2-101 | Glyma.20G044800                         | 2 | NM_001254150 | Chr20:8268501-8275551   | AT2G44060.1( Late embryogenesis abundant protein, group 2 )                                         | 312 | 7051 | 4.72 | 34.36 |
| GmLEA2-102 | Glyma.20G140900                         | 1 | XM_003555974 | Chr20:37967537-37968547 | AT4G05220.1(Late embryogenesis abundant (LEA) hydroxyproline-rich glycoprotein family)              | 227 | 1011 | 9.36 | 26.06 |
| GmLEA2-103 | Glyma.20G216300                         | 1 | XM_003556371 | Chr20:45204176-45205311 | AT5G36970.1(NDR1/HIN1-like 25)                                                                      | 250 | 1136 | 9.83 | 27.94 |
| GmLEA2-104 | uncharacterized protein<br>LOC100797168 | 1 | XM_006599136 | Chr16:18333921-18335433 | AT5G45320( Late embryogenesis abundant protein, group 2 )                                           | 207 | 1513 | 9.23 | 22.77 |
| GmLEA2-105 | protein YLS9-like                       | 1 | XM_006577031 | Chr3:42994014-42994917  | AT2G35980( NDR1/HIN1-like 10)                                                                       | 227 | 904  | 9.5  | 26.22 |
| GmLEA2-106 | uncharacterized protein<br>LOC100784646 | 1 | XM_003548348 | Chr16:1579950-1580875   | AT4G01410(late embryogenesis abundant hydroxyproline-rich glycoprotein)                             | 250 | 926  | 9.51 | 27.90 |
| GmLEA2-107 | uncharacterized protein                 | 1 | XM_006589805 | Chr10:9182898-9183497   | AT2G27260(late embryogenesis abundant hydroxyproline-rich                                           | 199 | 600  | 8.84 | 22.42 |

|            |                                            |   |              |                         |                                                                                              |     |      |      |       |
|------------|--------------------------------------------|---|--------------|-------------------------|----------------------------------------------------------------------------------------------|-----|------|------|-------|
|            | LOC102663298                               |   |              |                         | glycoprotein)                                                                                |     |      |      |       |
| GmLEA2-108 | protein YLS9-like                          | 1 | XM_003533271 | Chr9:37252919-37253898  | AT2G35980( NDR1/HIN1-like 10)                                                                | 178 | 537  | 9.44 | 21.08 |
| GmLEA2-109 | uncharacterized<br>protein<br>LOC100777620 | 1 | XM_003526081 | Chr06:43350865-43360367 | AT2G01080.1(Late embryogenesis<br>abundant (LEA) hydroxyproline-rich<br>glycoprotein family) | 624 | 1875 | 8.12 | 68.95 |
| GmLEA2-110 | uncharacterized<br>protein<br>LOC100807939 | 1 | XM_003543336 | Chr13:39157431-39157958 | AT3G54200(late embryogenesis<br>abundant hydroxyproline-rich<br>glycoprotein)                | 175 | 528  | 8.57 | 19.28 |
| GmLEA2-111 | uncharacterized<br>protein<br>LOC102659599 | 1 | XM_006574253 | Chr01:55422524-55423102 | AT3G54200(late embryogenesis<br>abundant hydroxyproline-rich<br>glycoprotein)                | 192 | 579  | 8.13 | 21.16 |
| GmLEA2-112 | uncharacterized<br>protein<br>LOC100804569 | 1 | XM_003543939 | Chr13:11874210-11876570 | AT3G54200(late embryogenesis<br>abundant hydroxyproline-rich<br>glycoprotein)                | 376 | 1333 | 9.57 | 40.96 |
| GmLEA2-113 | uncharacterized<br>protein<br>LOC100800449 | 1 | XM_006593218 | Chr12:35682617-35682985 | AT3G54200(late embryogenesis<br>abundant hydroxyproline-rich<br>glycoprotein)                | 122 | 369  | 7.75 | 13.47 |



**Table S2.** The coding sequences and protein sequences of LEA2 gene family.

The coding sequences

>GmLEA2-1

ATGCCGCCCCACCGCGATCGCGACCATGACCACGACGACGATCACGTGGCTGAGCACC  
ACCACCACCACCACCACAGACCCATCAGAAGAAAATTGGTGAACACTCACCACAGCG  
GCAAAACACACCCTCTTATCTGGCTAGCGGCCATTCTCTGCACCATCATAGCCATAGGC  
GTTGTAATAGCCGGCATAGTTGTTTTTCGTGGGTACATGGTGTATCCACCCTAGAATCCCT  
GTGATCAGTATACCAATGCCACCTCGATCTTCTCAGCAACGACTACACGGGCCTCCT  
CCAGACGCAGCTCACCATCATCGTCGTGGCGCAGAACGGCAACGCCAAGGCCCATGC  
AACGTTCTCCGACATAAGGTTCAACCTAAGCTACCAGGGACAAGGAATTGCTGTTATG  
CTCGCTCCGCCATTTCGATGTGGCCAAGAAGAGCTCCAAGCCACTCAACTACGTTGTTT  
GGTCTGCTTCCATTCCGTTAACTCCTGAGCAGATGGAAGAAGTGGATGAGTCGTGGAA  
GCGTGACGTTATAGGGTTTGACTTGAAGGGAAGCGCGAGGACACGGTGGAGGGTTGG  
GCCGTTAGGTTCTGTAAAGTTCTGGTGCAATTTGGAGTGTGAGCTCAGGTTTTCGTCCTT  
CTAATGGGAGTTACATTCATCACTCACGCTGCACCTCTGAGTCTAAATAA

>GmLEA2-2

ATGGCCAAGTCCATACAGCAAGAGCGAAGAAGCGGCAAATGTTTCGTATATTTGCTGG  
CAGCCTTTGTTCATCTTATGCGCACTTGTGTTGGTTTTTTCGTCCTTATTGCGCGTCAAGA  
ATCCATATCTCAAATTAAGATCAGCTACTTCCAACAAAATCAGTTACAGCACTTCACCTT  
CCTTCAACGCCACCCTCATCATCTTTCTCGGCATCAAGAACCCAAATTTGGCGCCTTC  
AGTTACAATAATAACAGGGTGAGTGTGCTCTATGCGGGTGTAAGATCGCTGATAGGCA  
AATCAATGGTGGCAGGGTTCGTTTCAGAGAAACCAAAGAAATTAATGTTACTGTGAAA  
TTGATGTCCGCTAAGGCACCCATTAGTGAGAATCTTTCTATTGACATTAGTTCCGGGGTC  
GTTGAATCTCACGAGTAATGTCAAATTTAGTGGCACAGTTCATATGCTCAAGATTATCA  
ACATCAGAAAGACCATAGAAATGGCTTGTGCTATGAAGCTCAACTTGACCTCGCACAC  
AATTCAGGGTATTCAATGCCAATAG

>GmLEA2-3

ATGTGCCCGTGGGCGTGGGTATGTTTCACTTTGCCACATCAATCCATCCATCCTCACAC  
TCCAACACCGAGCGAGCCATGGCGAAGCCCGAGAACCGCACTAACTTAGCTTCGTGTT  
TCGTGGCCACCGTTTTCTTGATCTTCTTCTCATTGTGGTCTTCATCGTTTACTTCACTG  
TGTTCAAGCCGAGTACCCCAAAATCGCCGTGAGCGCCATCCAGATCCCTTCTTCTCC  
GCCACTAACGGCACCGTCAACTTCACCTTCTCCAGTACGCCTCCGTTAGGAACCCTA  
ACCGAGGCACCTTCTCCACTACGACAGCTCGCTCCAGCTTCTTACTACGGCAGACA  
GGTCGGCTTCATGTTTCGTTCCGGCCGAAAGATCGCCGCCGCGCAGGACTCAGTACATG  
GCCGCCACCTTACCGTTCAGTCTTTCCCTTGGGCCTGGGGCCCACCTCCGTGGATG  
GGCCTAGTAGTGTGGGGCCCACGATGGAGATGGAGTCGAGGATAGAGATGGCGGGGC  
GCGTGAGAGTGTTACACCTTTTTCAGTCATCACGTGGAGGCCAAAGCTCAATGCAGGGT  
CGCCATCGCCATCAACGATGGATCGGTGTTAGGTTTTTCGGTGCTAA

>GmLEA2-4

ATGCCTGCAATCTCTCCCGGTAATGCGCCTAACTACAATAACTTGCTGCACCATTCA  
CCACTTTATAATGAAATTAATGCGCTCTCTCAAATATCAAACATTTTTGTCAAGAGTCTC  
TGCATATGGCTCCTGCAAGTTATAGGCCTCTTAAGCCTTATTGTTCTGTGCCTATGGCTG  
GCCTTACGACCCAAGAGCCCCCTCCTACTCCATTGTGTTTCATCTCCATAGGACAGCCCTC  
GAACTCAAATGAAAACAACACCATCTTTTACAACCTTGATATTGAAAACCCAAACAAA

GACTCGAGCATTACTATGACGACACAATATTAAGTTTCTTATATGGGGAGCAAGAGGA  
TGATGTGGGGGAGACAACCTATAGGCTCATTCCACCAAGGAAGTGGCAACACCCGGGAT  
GTATCCGATACAGTTAATGCCAAACCTCGACCATTCAAACCTCTCTTAAATGCCATCTCA  
AATGCAACCAGAGTTAAAAGTTGCTTTGATCACAAGATATCAATACAAGACATGGGGA  
ATTAA

>GmLEA2-5

ATGTCGGAGTGCAGCACCACAAGGGGAAGAAGAGGAAGATCTTCCGGCAAGTGTTTC  
TGGTGCATAGTGGTGTTCCTCTTCCTCGTGCTGCTACAATTCTTTTGATATGGGCAATC  
CTTAGACCCACCAAACCCACCTTCACCCTCCAAGACGTCACGGTCTACGCCTTCAACG  
CCACCATAACCGAACTTCCTCACTTCGAATTTTCAGGTCACGCTCATCTCGCGCAACCCG  
AACGACAACATCGGTGTTTACTACGACCGCCTCGAAATCTACGTAATCTACCGGAGCCA  
GCAGATCACGTACCGAACC GCCATCCCTCCGACCTACCAGGGCCACAATGAGATCAAT  
GTTGGTCTCCGTTTGTATGGTACCAACATCCCCGTCGCGCCGTTCAATTCCTCCGC  
CTCAGCCAGGACCAGAGTGACGGTAATGTCTCGTCACCATCCGAGCCGACGGAAGG  
GTTTCGTTGGAAGGTCGGCGCCTTCATCTCCGGTCGCTACCACTTCTACGTCCGCTGCC  
TGCCTTCATCTCCTTTGGCCCCGCAGCAATGGAATCGTCGTCGGAGAAAACGCCATC  
AAGTTCCAGATAATCCAGCGGTGCTCCGTTAGTGTCTAA

>GmLEA2-6

ATGTCCCATCTAAACGGCGCGTACTACGGCCCCTCCGTTCCGCCGCCGAAATCCTACCA  
CCGCCCTCCCGCGGGCGGCCGCGACGGCTGCTGCTGCGGGCTGCCTGAGCTGCTTCTGC  
GGCTGCATCTTCGACTGCATCCTGGGCCTCATCTGCAAGATCCTCACCACAATCCTCAT  
CATCGTAGCAATACTCGGCTTCTCTTCTGGTTCATCGTGCGCCCCAACGTGCTCAAAT  
TCCACGTTACCGACGCGTCCCTCACGCGCTTCGACTACACCACCAACAACACTCTCCA  
CTACGACCTCGCCCTCAACGTCTCGATCCGCAACCCGAACCGCAGGGTCGGCGTCTAC  
TACGACCACATCGAAGCGCACGCGCTGTACCAGGATGTTTTGTTTCGGGAACCAGACAT  
TAGGGCCGTTCTTCCAGCACCACAAGAACCACCTTCGTGAATCCCCTTTTCAAGGG  
CCAGCGCGTGACGCCACTCGCCGGGAACCAGGTCGAGGTGTTTGACAAGGAGAAGG  
GTTTCGGGTGTTTACACCATCGATTTGAAGCTCTTTATGGTGGTTCGGTTCAGTTCTTG  
CTGTTCAAGAGTGCGAGCGTGAAGCCCAAGATTCGGTGTGCGTTGCACGTGCCGCTG  
AAATCGCGTAACGCAACAACAACACTATCTCCCCCGATGCTGCGTTTCAACCCACAGAGT  
GCGGTTGGGATTACGGGAAAAAATGGTGGATCCATTAG

>GmLEA2-7

ATGGCAGACCCTCAGAAAATTCACCCTGTGCACCATGATGTTGAGGCACAAAACCACC  
CTTCAGCACCATTGGTGCCAAGGAGCATGTCCAAATCTGATGCAGGTGATCCACAACG  
AGTAGTAGTACAACAACAACAACAACAAACATTCTCTGAAGCAAACCAAGCCACCACC  
GAAGAAAAGAAGAAGCTGCTGCTGCAGGTTCTTCTGTTGGCTAATAAGCATATTGCTG  
ATTCTGATAGTGGCAATTGGCATCACTGTTGGAATACTCTACCTTGTCTTCAGGCCAAA  
GCTTCCAAAGTACTCGGTGGACGAACTTAGAGTCACACACTTTGATCTTGCAGACAAC  
AACAGCTTATCAGTGACATTCAACTTGACAATAACCGCCAGAAACCCCAACAAAAAAA  
TTGGAATAGACTATAGGGGTGGCAGCCACATAAGTGCTTGGTACATGGACACAAAATT  
GTGTGAAGGGTCTTTGCCAAAATTCTACCAAGGTCACCGCAACACCACGGTGCTTAGC  
ATCCCTCTTACTGGGAAAACGCAGGATGCTACCGGCTTGCAAAGTACCCTTCAGAATC  
AGCTGCAAGAAAGTGGGAATGTGCCTCTCAATTTGAAGGTGAAGCAGCCTGTGAGGA  
TCAAGCTTGGGAAGTTGAAGCTGTTCAAATCAAGTTCAGGGTTAGGTGCAAGATTGT

GGTGGATAGCCTTAGTGCTAATAGTTCTATCAGAATTCAGAGTAGTAGTTGTAAATTCAG  
GTTTAGGCTGTGA

>GmLEA2-8

ATGGCCGACCGAGTTCACCCCAGCCACTCGCCTTCCGTTTCCGCCGACTCACAACCGG  
CGTCGCCTCAAGACTCCTCCGTCGTTCCAAAACCGCCGTTGCCACCGTCGTCGGAGAA  
GCCAGTGCCTCCGCCTGGAACCTACGTCATCAAGATCCCTAAGGACCAAGTCTATCGC  
GTCCCTCCGCCGGAGAACGCTCGCCGCTACGACCAATACTCGCCGTAAACACCGCC  
GGAGCCGATGCTGCTGCTGCTTCTGCTGGCTCATCGGAATCCTCTTCATTCTCGTCGTT  
TTCTCGCCATCGCCGCCGGCGTCTCTACCTCGTTTTCCGTCCCGAGGAGCCGAAATA  
CTCCATCGAAAACATCGCCGTCAGAGGAATTAACCTCACCTCGCCGTCATCCACGGCG  
GCGATGTCGCCGGTGTCAACGTCACGGTCAAGGCCGATAACCCTAACGATAAGATCG  
GAATCCGTTACTTGAAGGATAGCTCCGCCGAAGTGTTTTATAAGGACGCGAGGCTGTGT  
AACGGCGCTCTGCCGGCGTTTTACCAGCCGTCAAACAACGTGACGGTGTGGGACG  
GCGTTAAGGGGTGACGGAATCGAACTGAGGAGCGAGGTCCGAAGAGCGTTGCTGGAG  
GCGCAGACCAAACGGAGGGTGCCGTTGACCGTTAGGATTAGGGCGCCGGTAAAATA  
AAAGTGGGGTCCGTCAAGACGTGGAAGATAACCGTTAAGGTGAACTGTACATGACGG  
TGAATGAGTTAACGGCGCGGGCCAAGATTGTTTCTAACGTTGTAATTATGACGTGGAT  
CTTTGGTGA

>GmLEA2-9

ATGTCGACATCTGATAAGCCAGAAGAGGTGGAAAGGGGTAGCAAGGATGAAAAGCAC  
AAGGAAGATGATCAAGAGGAGGGGAAGGGTGGATTTCATTGAGAAGGTGAAGGATTTT  
ATTCATGACATTGGTGAGAAGATTGAGGAAGCTATTGGGTTTGGGAAGCCGAGTGCCG  
ATGTTACTGCGATACACATTCCATCAATTAATCTTACAAAGGCAGATCTTGTTGTTGATG  
TGCTCATCAAGAACCCGAATCCGGTGCCGATCCCTCTGATTGACATAGATTACTTGGTT  
GACAGTGATGGAAGGAAGCTAGTTTCCGGATTGATACCTGATGCGGGTACCATCCATGC  
ACATGGAGAGCAAACCTGTCAAATTCCTGTCACTTTGATTTATGATGACATCAAGCAA  
CATATGCTGATATTAACCTGGAAGCATCATTCTTATAGGGTGAAGGTTAGTCTCATT  
TTGATGTTCCCATCTTGGGAAGGCTAACTCTACCTTTGGAGAAAACCTGGAGAAATCCC  
ATACCATAAAGCCTGATATTGATCTTGAGAAGATTCATTTGAAAGGTTCTCTTTTGA  
GAGACAATTGCAACTCTTCACTTGAAGTTGGAAAACAAGAATGATTTTGACCTCGGCC  
TCAACGCGCTCGATTATGAGGTCTGGCTTGGTGATGTTAGCATTGGTGGTGCAGAACTC  
ACCAAGTCTGCTAAAATTGAAAAAAGTGAATTAGTTATATTGATATTCCAATTACCTTC  
AGGCCTAAGGATTTGGCTCTGCACTATGGGACATGATTAGAGGAAGAGGAACTGCTT  
ACACCATAAAAGGACATATTGATGTTGACACTCCCTTTGGAGCAATGAAGTTGCCCATC  
AGCAAAGAAGGTGGTACTACCCGCTCTTAAGAAAAAGAAGGAAGATCGTGATTATGATG  
ATGATGACGATGATGAGCAGGAATGA

>GmLEA2-10

ATGCCAACC GAATCTGGTCCAAATGTGGTGGCTAATGAAGAACTTGGCACACCAAAC  
AACCAAGGAATCAACATTCTCAGCAATCAGGAGCACCAAATCCCTTGCCAACACCAG  
AGCCATTTTCGGGCAACCTCGACTTCAAAGGACAAAACCAATTATATGGTGTGCTGCA  
ATAATGTGCTTCATATTCAGCCTAGTGCTTATCTTCTTTGGAATTGCAACACTGATTCTCT  
ACCTTTCCATGAAGCCGCGAAACCCACGTTTGACATTCCAATGCAAGCCTCAATGT  
GGTGTACTTTGACTCACCACAGTACCTCAATGGTGAATCACTCTCCTTGCAAATTTTT  
CCAATCCTAACAGGAGAATTGGGGTGAGGTTGAGTCCCTGAACATTGAGCTTTTCTAC

TCAGACAGGCTCGTTTCTTCACAAACAATAAAGCCTTTTACTCAAAGGCCAAGGGAAA  
ACAGGTTGCAATCAGTGAACCTTGATATCAAGCTTGGTGTTTTTGCCTCAAGATGTTGGT  
GTAATACTACAAAGGCAAGTGGAGAATAACAGGGTCAATTACAATGCAAGGGGAACA  
TTAAGGTGAGGTTCAATGTTGGCCTTATCCATTTATCTTACTCTCTGTATAGCACATGCC  
AGATAGAGATGACTAGTCCTCCAGCGGGTATTCTAGTAGCCAGACAATGCATAACAAAC  
CGATGA

>GmLEA2-11

ATGAAGGTAGGATCTGGTAAAGGGAGAAAAGTGTGCCTGACGGTGACAGGTGTTGTG  
ATTGCAATTGTATTGCTAATTGTGATACTAGCGTTGACAGTGTTCAAAGCCAAGCATCCT  
GTTACCACAGTGGACTCAACGAAGCTAGAGGACTTTCACGTGAGCTTGGATCCAGTAA  
AACTAAGGGTAGATTTGAATGTGACCCTGGGAGTGGATGTCTCAGTGAAGAACCCGAA  
CAAGGTGGGATTCCAGTATTCAGACAGCACTGCCACCTCAATTACAGAGGGCAGCTG  
ATAGGTGAAGTCCCGATCTCTGCCGGAGAGATTTTCATCCGGTGAGACCAAAGGATTCA  
ATCTCACCTCACCAATTATGGCCGACCGTTTGCTCTCCAATTCTCAGCTTTTATCTGATG  
TCACATCTGGTACATTGCCCTAAACACTTTCGTGAGGATGTCTGGGAAAGTCAGCATC  
TTAGGCTTTATCAAAGTCCATGTGGTTTCCCTCCACTTCTTGATGTTGCAATTAATCTT  
TCTAATGGAAGTGTGGGAACCAAGAGTGCCAGTACAAGACAAAACCTTTGA

>GmLEA2-12

ATGTCCCAGTTGAACGGAGCCTACTACGGCCCTCCATCCCGCCGCCGAAAACCTTCCT  
ACCACCGTCCCTGGGCGCGGGCGGAGGCCTCGGCTGCTGCTGCGGGTGCCTCTTCAGCCT  
CATCTTCAAGCTCATCCTAACCGTGATCATCATATTGGCATCGCCGTGTTCTTTTCTG  
GCTCATAGTCCGTCCCAACGTGGTGAATTCACGTCACCGAGGCCACCCTGACGCAG  
TTCAACTACACCCCAACAACACGCTCCACTACGACCTCGCCCTCAACATCACGGTCC  
GAAACCCCAACAAGAGGCTCGGAATCTACTACGACCGCATCGAGGCGCGTGCAATGTT  
CCACGACGCGAGGTTTGATTCCCAGTTCCCGGAACCATTCTACCAGGGCCACAAGAGC  
ACCAACGTGCTGAACCCGGTGTTTAAGGGTCAGCAATTGGTGCCACTCAACGCTGACC  
AATCCGCGGAACTGAAGAAGGAGAACGCCACTGGGGTGTACGAGATCGATGTGAAGA  
TGACCTTAGGGTCAGGTTCAAGTTGGGTGTCTTCAAGACCAAGACGCTTAAGCCCAA  
AGTATCATGCGACTTACGTGTTCTTTGAAAGGAAGCGCCGGTGTGGTGTCTTTCAG  
ACCACCAAGTGCGACTGGGATCGCTGA

>GmLEA2-13

ATGGCCGATAAGCAACCCCACTTGAATGGTGTCTTATTACGGTCCCGCCATTCCCCCGGC  
GGAGCAACCACACTACCGCCCTAGCCGCGAAAGAAGCTGCTGTTGCTGCCTCTTCGGA  
ATCTTGTGGAAGATTCTGGTTGCACTCATTGTCTCTGTTGGCCTCGCGGTCCTCATCTTC  
TGGCTGGTGGTTCAACCCCGTTTCTTCAAGTTCCACGTCACGAAAGCCAACCTAACAC  
AATTTGATTACTATACCAACAACAACACCCTTCACTACAACATGGTCTCTCAACTTCACT  
GCACGCAACCCCAACAAAAACTCAGCATATACTACGACAAAGTAGAGGCATTAGCAT  
TCTACGAGGATGTCAGGTTTCGCCAATTACAGTGTGATAACGCACATGAACTCCTTCCGC  
CAGTACAAGAAGACCACCAGCCACATGAGCGCCGTTTTCTCGGGCAGCAAGTGTG  
CCGCTCGACAACGACCTAGTCTCAGAGTTGAACCAAGACAAGAGTGGTGGGGTGTAC  
GAGATCGATGTGAAGCTTACTTTCAGGATTAGGTTTCAGGCTCGGGGATGTCAAACCC  
GTCGCTTCAAGCCCGAGGTCAAATGTGATATCAGGGTTCCTTGAGGACCAATGGCAG  
CGTAACTTTGTTTCAGACCACCAAGTGTGATGTGCGATTACTAG

>GmLEA2-14

ATGGCAGATTATAAGCAACACCACGGAAGAAGCTGCGGCTGCTGCTGCCTCTTTGGAA  
TCTTGTGGAAGATTGTGGTTGCACTCATTGTCCTCGTTGGTCTTGTATTCCTCATATTT  
GGCTGGTTGTTCAACCCCGCTACTTCAAGTTCCACGTACGGAAGCGGACCTAACTCA  
ATTTGAGTACTATCCAAACAACAACACCCTTCACTACAACATGGTCTCAATTTCACTG  
CACGCAACCCCAACAAGAAGCTCAGCATATACTACGACAAAGTTGAGGCATTAGCATT  
CTACGAGGATGCCAGGTTGCGCAATTACGATGTCATAACTCACATGAACTCCTTCCGCC  
AGTACAAGAAGAGCACCAGTCCCATGAGCGCCGTTTTCTCGGGGCAGAAGGTGTTGAT  
GCTCAACAACGAACAAGTCTCTCAGTTCAACCAAGACAAGAGTGTTGGAGCTTATGAT  
ATCTATGTGAAGCTCAACTTCAGGATTCGGTTCAGGCTCGGGGACTCGATTTCCCGTCA  
CTTGAAGCCCAAGGTCAAATGTGATCTCAAGGTTCCCTTGAACAAAAGTGGCACCTTT  
ACTCTGTTTCAGACCACCAAGTGCCATGTCAATGTCTAG

>GmLEA2-15

ATGGCCGATAAGCACGGAAGAAGCTGCTGTTGCTGCCTCTTTGGAATCTTGTGGAAGA  
TTCTGGTTGCACTCATCGTCCTCGTTGGCCTCGTATTCCTCATATTTCTGGCTGGTGGTTC  
AACCCCGCTCCTTCAAGTTCCAGGTACGGAAGCGGACCTAACCCAATTTGATTACTA  
CACCAACAATCACACTCTCCACTACAACATGGTGTCAACTTCACTGCACGCAACCC  
ACAAGAAGCTCAGCATATACTACGACAAAGTTGAGGCATTAGCATTCTACGAGGATG  
CCAGGTTGCGCAATTACGATGTCATAACTCACATGAACTCCTTCCGCCAGTACAAGAAG  
AGCACCAGCCCCATGAGCGCCGTTTTCTCGGGGAAGAAGGTGTTGATGCTCAACAGC  
GAACAAGTCTCTAAGTTGAACCAAGACAAGAGTGATGGGGTTTATGACATCTACGTGA  
AGCTCAACTTCAGGATTCGGTTCAGGCTCGGGGACTCCATATCCGGTAACTTGAAGCC  
CAAGGTCAAATGTCACCTCAAGGTTCCCTTCAGTAAAAGTGGCACCTTTACTCTCTTTG  
AGACCACCAATCTGCTGTTGCTGCCTCTTTGGAATCTTGTGGAAGATTCTGGTTGCAC  
TCATCGTCCTCGTTGGCCTCGTATTCCTCATATTTCTGGCTGGTGGTTCAACCCCGCTCCT  
TCAAGTTCCAGGTACGGAAGCGGACCTAA

>GmLEA2-16

ATGGCCGATAAGCAACCCCACTTGAACGGCGCTTATTACGGTCCC GCCATTCTCCGGC  
GGAGCAACCACGCTACCGCCCTCACAGTCACCGCGGAAGAAGCTGCTGTTGCTGCCT  
CTTCGGAATCTTGTGGAAGATTCTGGTTGCACTCATTGTCCTCGTTGGCCTCGCGGTCC  
TCATCTTCTGGCTGGTGGTTCAACCCCGTTCCTTCAAGTTCCACGTACGGAAGCCGA  
CCTAACACAATTTGATTACTATAACCAACAACAACACCCTTCACTACAACATGGTCTCA  
ACTTCACTGCACGCAACCCCAACAAGAAGCTCAACATATACTACGACAAAGTTGAGGC  
ATTAGCATTCTACGAGGATGTCAGGTTGCGCAAGTTACGATGTCATAACACACATGAACT  
CCTTCCGCCAGTACAAGAAGAGCTCCAGCCCCATGAGCGCCGTTTTTCACAGGGCAACA  
ATTGCTGATGCTGAACAATGATCAAGTCTCAGAGTTCAACCAAGACAGGAATACTGGT  
GTTTATGACATCTATGTGAAGCTCTACTTCAGGATGAGGTTCAAGGCTCGGGGACTTTATA  
TCCAATGACTACAAGCCCAAGGTCAAATGTCACCTCAAGGTTCCCTTTCAGTAAAATG  
GCACCTTTACTCTGTTTCAGACCACCAATGTGATGTCGATTTCTAG

>GmLEA2-17

ATGATCTTACCATATCATTTC AAGACCTTAAAGTACCAA ACTTCCA ACTCTTCTCTCTTC  
TCTCTTCACTCTTCACTCTTGTGTCATTTCTCACA AAAACCAGTGTC CGTAACATCTCC  
ACCTTAACGATGTCGGTAAAGGAGTGTC ACCACCACAAGGGAAAGAAGCACAACTC  
TGGAGACGCATCTTCTGGGGCATAGTGATCTTCGCCTTCATCGTGTGCTAACAGTTCTT  
ATAATCTGGGCAATCCTAAAGCCTTCAAAGCCAACCTTCATCCTCCAAGACGTGACCGT

CTACGGCTTCAACGCCACCATCCCCAACTTCCTCACCTCAAGCTTTCAGGTCACGCTTT  
CCTCGCGCAACCCCAACGACAAAATCGGAGTCTACTACGACCGTCTCGACACCTACGT  
CACTTACCGGAACCAGCAGGTCACGTACCGAACCTCAATCCCACCCTCATACCAAGGT  
CACAAGGAAGAGGATGTGTGGTCCCCATTCGTCTTCGGCACTAACGTCCCCGTGCAC  
CCTTCAACTTCGTTGGTCTCAGTCAAGACCAGACCAACGGCAACGTCCTCGTCCTCGT  
TAAGATTGACGGTAAGGTACGATGGAAAAGTTGGTACCTTCGTCTCTGGTCACTACAACC  
TCTATGTAAGGTGCCCTGCTTTCATAACTTTTGGCCCCCAAAGCACCGGGATTGCCCTT  
GGCAAGAACGCCGTTAAGTATCAATTGGTTCAACGCTGCACCGTCGGGGTTTGA

>GmLEA2-18

ATGTCAAAGGACAAAGTTTCCGGTGATCCAAGACGCGCAGTGTGCACAGGCATCACCA  
TCTTCCTCCTCTTAGCCGGCGTCACTCTCCTAGTCCTCTGGCTGGTCTACCGTCCCCAC  
AAGCCGCGCTTCACAGTAATCGGCGCCGCGTCTACGACCTAAACACCACCACCCAC  
CGCTGATGTCGACCACCGTGCAGTTCTCCGTCTCATAAAGAACCAGGCGGTGT  
CTCCATTTACTACGACAGGTTCTCCGCCTTTGTCTCGTACAGGAACCAGGCCATAACGC  
CGCAGGTTCTGCTGCCGCCTCTGCACCAGGAGAAGCGAAGCTCGGTGTGGTGTGCGC  
CGGTGATGGGAGGCACGGCGCTTCCGGTGTGGTGGAGGTGTCTGACGGGCTGGCGG  
TGGACGAGGCTTATGGGTGGTGGGTCTGAGGCTGATATTTGAGGGCAGAGTGAGGTG  
GAAGGCCGGGGCCATCAAACCTGCGCACTATGGACTGTACGTTAAGTGCGATGTTTTG  
ATGGGTTTGAAGAAAGGGTTGGTGGGTCAAGTTCCTCTCCTGGGAGTTACACCCTGCC  
ATGTCCATCTATGA

>GmLEA2-19

ATGGATGTTTCCACACAGAATCCCGTGTTTTCTTCCAAGAAATGCTGTTTCTCCTTTTG  
ATCATATGCATGGTGGTTGGATTAGCCACTTTTTTTATGATCCTCATCATTAGACCCACA  
AGCCTGTTTTCTCTGTTTCGGGAGGTTAAAATAAACTTTTACAAGATTGATAATGATAGTT  
CTAATCTAACTCTGCTGGTTTCATCTGTAATCTACTTAACCCTCAATGCAGAAAATCATA  
ATAAGTTTGGCATAGGTTTTAGTTCATCAAGGTTTCTTGTTTATCATGAAGGTTTGCATAT  
AGGAACTATTAGAATTCCTTGGTTTTTTCAACCTCCTCACAGTGAAAACGTGAGTGTAC  
CATCTCGTGTCTTATTGCATAGTGCCAATCTCACAAAATCATCGCCAACACATCGTTAC  
AAGAAATTTCAAAGCAAACATGGCACAGATGAGGATCATAGGGGATTCTAGAGCCCA  
CGTGTGGGTACTTCATATAAACTTTTTGAAATTATGATTTTTGCCTTTTCATGTGACTGT  
GAGTCACATTTAAGTTGA

>GmLEA2-20

ATGTCCGACCCAGCTTCCAAACCCAACGGAAACGCCGCGGCCGCCACTAACGGCAAT  
CCCGGACCCGTTAAGTCTCAACTCTACAACCCCAACCGTCAAGTTTACCGGCCGCAAT  
CGCACTACCACCGTCGCGGCCAACGCTCCCACCGCAACTTCTGCTGCTGCTGCTGCTT  
CTGGACCATCCTCACCTCCTCGCGGTGGCTCTCCTCGCCGCCATTGTCGGCGCCGCAC  
TTTACGTA CTACTACCGCCCTCACCGTCCC GAATTCTCCGT CACAACCTCCG CATTGCG  
AAGATGAACCTCACCACTTCCGCCGACTCCCCTTCCCACCTCACACGCTCTTCAACC  
TCACTCTCATCGGAAGAACCCTAACAACCACCTCGTCTTCTTCTACGACCCGTTCTCC  
ATGACGGTGTCTCGAACTCCGTCCCCGTCGGGAACGGTTCCGTTACGGCGTTTACTTC  
GGACAAGAACAACCAGACGAGCCTCCGCGCGGTGCTGTCGGGGTTCGCAAGATCTGGA  
CACGGACTCGTTGACTAGCCTGAGATCGGGGCTGAAGATGAAGAGAGGTTTCCCCGTG  
GAGATTCAGATGGACACCAAGGTGAAGATGAAGATGGATTGGCTCAAGAGCAAGAAG  
GTCGGAATTCGAGTCACCTGCGACGGAATCAGAGGAACCGTTCCTCCGGCAAGTCTC

CGGCGGTGGCCTCCGTCGTCGACTCCGAGTGTAAGGTGGATCTTCGAATCAAGATCTG  
GAAGTTCTCCTTTTAA

>GmLEA2-21

ATGGAGGAGCGGGTGTGTTGCCATCACCGCCACCGCCACCGCCACCTCTCGAAAAG  
AAACATAGTACCAACAACTCGAGTTACCAGACTTCAACCCTGGCACCTACGTTGTCC  
AGGTCCCAAGGACCAAGTCTACCGTGTTCGCGCCGGGAAAACGCCGAATCGCCG  
AGAGCCATAAGAAAGCCCCTCCAAGGCGGCGAAAACGTCACGCTGCTGCTTGTTTTG  
CGTATTGTTCTTCATTATATTCTTCGTCCTTCTCATTCTTCTAGGAGCCGTTCTAGGTGGT  
CTTTTTTCCATGTTACTCACACCAAGGACCCTCAGTTTTCCATCACACGCTTTAAGGT  
GGTGGAGACCAACCCCAACCAATACGACGTCACCTTTGGAAGTTCACAATCTAAAT  
TCCGACGTGGGAGTTTCGTATAAAAACAAAGGCCATGTCTCCCTCTCTCTTAGGCGAC  
AAGAGGTTGCTTCAGGAGCGTACCCTAGTTTCAATCAAGACGCTCACGATAGGACAAC  
GTTTGGCGTAACTTTAACATCCTCAAAGTCGGTCTCCAAAGGAGGTGGAGGAAAGC  
GTCACGAACGATAAGAAGAAAGTGAATGTGACATTCTTTGGCCATTACGCCCTAG  
CACGCATGAAAATGGGCTTGTGCGTAGTGGGACAATGAAATTCGATGTTACGTGCAAT  
GTGAAGTTGGATACATTGGCCAAAACCACTCAAGTACTCTCTCAACAATGCGAAACTA  
AACGACACTAG

>GmLEA2-22

ATGTCTAAAATCACAATAACCTCTCCAAAACACTGTGCTGGCAAAGAAGGACTTAGAA  
TCAAGAAGAACTACAAGAAGATCTACTTCACTTTCTCAGCATTTTTACCACAATCCTA  
CTACTAATACTTCTTATATGGCTCATCTCCACCTGCAAAGCCTCAATTCTCCCTCAA  
GAAGTTGACATCTACCAACTAAACCTCTCAGGCCAAACCTCAACTCCTCCATCCAAC  
TCACCCTCCTCTCCAAAACCCAAACCAGAAAGTTGGCATTACTACGACGAGATTCA  
ATTCTATGCAACCTACAAGGGCCAACAATTACCGGTGATACCCCTGTGCCACCCTTCT  
ATCAAGGCCAAGAAGAGAGTAATCTCATAACAGCATCTTTGGTTCGGAAATGCTTTACCC  
GTGGCTCCATCTCTTGGTTATGAACTTGGTCGTGATCAAATTGTTGGAAGACTAGTTTT  
GAATCTCAAAGCCAATGGAAAGCTTCGTTGGAAAGTGGGAACGTGGGTCTCTGGACG  
TTACAGATTCAATGTTAATTGTGTTGCCATCAATGCCTTTGGACCCTTATTCTGCAGG  
TCCTCTCACTTCAAAGCAAGGGGCTCAGTGTCTACCACACTTTAA

>GmLEA2-23

ATGAAGCCCAACGACAACATGACAATGCTGGCCAAAACCGACTCCGAGGTTAGCAGC  
CTCACGCAGTCTTCGCCGGCGCGGTCCCCGCGACGGGACGTGTACTACGTGCAAAGTC  
CGTCGCGGGACTCGTCCCACGACGGCGAGAAGACTACGAACTCGTTCCACTCGAGTC  
CGCTGCAGAGCCCCTTAGGCTCCCCGCCCACTCCCACTCCAACCTCCTCCCTGGGCCG  
CCACTCCC GCGAGTCCGCCTCCACGCGGTTCTCGGGCTCACGCAAGAGCAGCTCCTCC  
GGCAACAACCGCAAGGGTCCGTGGAGGCCCTGGAAGGACCAGTTCCACGCCATCGAG  
GAAGAGGGCCTCCTCGACCCCAACGACAATGCCACCATGGCTTCCCTCGTCGCTGCT  
ATTTCCCCGCGTTTGTGTCGGCTTCGTCGTCTCTTCTCCGCGTTCTCCCTCATTCTCT  
GGGGTGCTAGTCGCCCTCAAAGCCCGCCATTTCTCTCAAGAGTATAACGTTTGACCAA  
TTCGTGATACAAGCGGGAGCGGATATGTCAGGAGTTGCCACAAGTTTGGTGTCCATGA  
ATTCATCTGTGAAAATGACGTTTCGTAACACCGCTACATTTTTCGGGGTCCATGTGACC  
TCAACTCCCGTGGATCTCAATTATTATCAACTTACTGTAGCCACTGGA ACTATGCCAAA  
GTTTTATCAATCAAGGAAGAGCCAAAGATCTGTTCCGGGTAATGGTAATTGGGAGTCATA  
TTCCACTGTACGGAGGTGGAGCCAACCTGAACAGTGTGAACGGTAAACCGGTTGAAC

CGGTGCCGTTGACGTTGAGCGTGATGGTGCGGTCGAGGGCTTATGTTTTAGGCAAATT  
GGTGAAGCCAAAGTTCTACAAGAAAATAGAGTGTTCCATCGTTATGGATCCGAAGAAG  
ATGGGCAAGGCAATTTCACTCGTCAAGAAATGCACTTACCAGTAA

>GmLEA2-24

ATGCCAATGGAGGGTCACGCCGACGTCTCCGCCACATTTCCGCCGCCTCCTGGCCACC  
ACGGCGCCGACACGTATATCGTGCAGCTCCCGAAGGACCAAGTGTACCGCGTGCCGCC  
ACGCGAGAACGCGTTGATCGTGGAACAGTACCGCAACCCAGCCACCGCGAAAAAAG  
ACGCGGCGGTTGTTGTTGCTGCTGCAGCCGTCGTGTCTTCCTAACCGTCGCTCTTATCG  
TTGTGGCAATCGTTGCCGTCGTTGGCATCACGCTGGCCACGTTGTACTTTATTTTCAGC  
CCCTCGGGTCCCAAGTTTACTGTCTCCCATGTGGCCGTTAATAGGAACAAGAGCTCGC  
GGGCGGCGCCGACGTACGAGGTTTCGTTGAGGGCGAGGAATCCGAACGAGAAGTTGG  
CGATTGAGTACCAGGATGGGGACGTGTCGCTGTTGTTTCGATGACACTAAGGTTGCCGA  
GGGAAGTTTCCGACGTTGGAGCAAGGGCGAGGTGAGGCGAGTGAGGTTACGGTTGA  
GCTGACCGGATCCAGTGGAGCGTTGCCAGGCCAATGAATGGTGGGGACGCAGCCGT  
GGATTTGAAATTGGAGATGAACTTGCATAAGGATAAGAACC CGGGACTCGAAACG  
TGGGCCATGAGGTCCGATGTGGCGTGTGAGTTTAAAGTTCAGCGCTCTCGGGAACGACA  
CGCGAGTCTTGTACAGCAATGCGATACCAAGTTCAAGCAATATTA

>GmLEA2-25

ATGGCTCAGAGCCCTGATCAGCAGATGAAGCCCTTAGCTCCATTCATATCATCAACCCA  
GTTACAGCAGACAAGAAGATCAGTTTCAAGAGAGAACATCCGAACAGAAAATCATTTCG  
CATAAGAAAGTTCGTGCTGTGCTGCGGTTGTTTCACTGCCCTTGTTGTGATACTCGTGG  
TCATACTGATAGTCTTGAGCTTCACCGTTTACAATGTCAAAGAACCCGAGGTGAGGATG  
AATTCGGTTACCCTTCTCAGTGGAAC TTTTGCAAACGGTGGTGCCACTAACAAACGTTAC  
ACTTGTGCTGATATCTTTGTCAAGAACACAAACGCTTTTACCCTGAGGTTTGGAAAGCA  
CCAGCACCATTGTTTACTATGATGGTGTGAGAATAGGTGAGGGTACTTCTCCACCGGGT  
AAGGCCAAGGCAAGAAGGACCATAAGGGTAAACTCGACCTTGGAGATTATGTCAAAG  
AAGCTTTTGAAATCCCAACTTTGAATATTGACCTCAGGGATCAGTTTTTGAATATCAG  
CAGCTATAAAGGATAGATGGTAAGGTGAAAATACTCAACATATTTCCGAGGAAGGTTG  
TGGTTGAGATGAATTGTACCATTGGATAACAACATCACCACTGGGTCGGTCACAAATGGT  
GATAATTGTCTTGGAGCCGTTGATATTTAG

>GmLEA2-26

ATGGCGGCCGAGTCTCTGCTCCGCCCCCGCCCCGAGGCGCCGAGGCCAAAGCGG  
CCTCGGCCCTCCGTCGGGGCGCACCAACCTAGCCTCCTGCGTGGTGGCCACCATCTTCC  
TAATCTTCATCATCATCGTTATCCTCATTGTATACTACACCGTCTTCAAACCCAGGACC  
CCAAAATCGCCGTCAACGCCGTCCAGCTCCCCTCCTTCTCCGTCGCTAACGGCACCGT  
CAACTTCACTTTCTCCAGTACGCCTCCGTTAGAAAACCCTAACCGTGCCGCGTTCACCC  
ACTACGACAGCTCCCTCCAGCTCATCTACTCCGGCAGCCAGGTCCGGCTTCATGTTTCATC  
CCCGCCGGCGAGATCGACGCTGGCAGGACGCAGTACATGGCAGCCACCTTCTCCGTCC  
AGTCCTTCCCCCTCTCGGTGCCGCCAGGATGGGCCCCACATTGGCCAACGGCGACGG  
AGTGGGCTTCAACTATGGGCTTAGGGTTGAGCCACTATGGAAATCGAGTCCAAGTTG  
GAGATGGCGGGGCGTGTCAAAGTGTGCACTTCTTACCCATCACGTTTATGCCAAAG  
CCGGTTGCAGGGTTGCCATTGCCGTAAGTATGGATCTGTCTTAGGTTTTCACTGCTAA

>GmLEA2-27

ATGCATGCCAAGACAGACTCGGAGGTAACAAGCCTGGATGCGTCGTCCAGCACAAAGG



TCTCCTCGGCGAGCAGTGTACTACGTTTCAGAGCCCTTCCCACGATGGGGAGAAAACGA  
CGACGTCGTTGCACTCCACCCCTGTTCTCAGCCCCATGGGTTCCCCTCCTCACTCTCAC  
TCTCCTCCAGCCGCTTCTCCGCTTCACGCCACCGCAATAACCATAATAATAAATCTTGG  
AAGGGCATCGACGTCATCGAAGAAGAGGGTCTTCTCCAATCCGAATTAGATCGCCAAC  
ATTCTCTCTCTCGTCGATACTATTTCTCGCCTTCCTCCTCGGCTTCTCCTTCTCTTCTC  
TCTCTTCTCTCATCCTCTGGTGTGCCAGCCGACCCATGAAGCCCAAAATCCTCATCA  
AGAGTATAAAATTTGACCATCTCAGAGTTCAAGCTGGTTCCGATTCCAGCGGAGTAGCC  
ACCGACATGATCACCATGAATTCCACCGTCAAATTCACCTTATCGCAACACTGGAACATT  
CTTTGGGGTCCATGTCACATCCACACCTTTTCGATCTCTCCTATTTCAGATATTGTAATTGCT  
ACGGGAAATTTGAAGAAGTTCTATCAGTCAAGGAAGAGTCAGAGATTAGTGAGTGTG  
GCGGTGATGGGGAACAAGATCCCGTTGTATGGAGGAGGTGCTAGCTTGAGTAGCTCAA  
CCGGTGTGCCACGCTGCCTGTTCCTTTGAATTTGACCTTTGTCATTTCGATCCAGAGCT  
TACGTGCTTGGGAGATTGGTGAAGCCCAAGTACTACAAAAGGGTTCAATGTTCCATCA  
ATTTGGATCCCAAGAAGATTAATGTTCCAATTTCCCTCAAGCATTCTTGACCTATGATT  
GA

>GmLEA2-28

ATGTCTGACCCAGCCTCCAAACCCAGCGGAAACGGCGCGGCCGCCACTAACGGCAAT  
CCCGGACCCGTCAAGTCTCAACTCTACAACCCCAACCGTCAAGTTTACCGCCCCGAAT  
CACACTACCACCGTCGCGGCCAACGCTCCCACCGTAACCTCTGCTGCTGCTGCTGCTT  
CTGGACCATCCTCACCTCCTCGCGGTGGCCCTCCTCGCTGCCATTGTCGGCGCCGCAC  
TCTACGTACTCTACCGCCCTCACCGTCCCGAATTCTCCGTCACAAACCTCCGCATTGCA  
AAGATGAACCTCACAACCTCCGCGGACTCACCTTCACACCTCACTACGCTCTTCAACC  
TCACTCTCATCGCCAAGAACCCTAACAAACCACCTCGTCTTCTTCTACGACCCGTTCTCC  
GTGACGGTGTCTCGAACTCTGTCCCCGTTGGGAACGGTTCCGTTACGGCGTTTACCT  
CCGACAAGAACAACCAAACGAGCCTCCGCGCGGTGCTGTGCGGGTTCGCAAGATCTGG  
ACACGGACTCGTTGACTAGCCTGAGATCGGGGCTGAAGATGAAGAGAGGGTTCCCCG  
TTGAGATTCAGATGGACACCAAGGTGAAGATGAAGATGGATTGGCTCAAGAGCAAGA  
AAGTCGGAATTAGAGTCACCTGCGACGGAATCAGAGGAACCGTTCCCTCCGGCAAAA  
CTCCGGCGGTGGCCTCCGTCGTCGACTCCGAGTGTAAGGTGGATCTTCAATCAAGAT  
CTGGAAGTTCTCCTTTTAA

>GmLEA2-29

ATGGAGGAGCGGGTGTCTTCGTCATCGCTACCGTCGCCATCACCCACCTCTTGAAA  
AGAACCATAATACCGACAAACTCAAGTTACCAGACTTAGACCCTGGCACCTACGTTGT  
CCAGGTCCCAAGGACCAAGTCTACCGTGTTCGCGCCGGAAAACGCCCAAATCGC  
CGAGAGCCATAAGAAATCTCCTCCCAACAAGGAAGCAAAAACGTCACGCTGCTGCTT  
GTGTTGCGTGTGTTCTTCATTATATCTTGGTCTTGCAATTCTTCTCGGAGCCGTTCTA  
GGTGGTCTTTTTTCCATGTTACTCACACCAGAGGACCCTAAGTTTTCCATCACAAGCTT  
TAAGGTCGTGGAGACCAAGCCACACCCCAAATACGACGTCACCTTTGGAAGTCCACAAT  
CCAAATTCCGACGTGGGAATTTTGTATAATGGCAAAGGCCATGTCTCCCTCTCTTAAG  
GCGACAAGAGAATATTGCTTCAGGAGCATAACCTACTTTCCGTCAAGACTCTCACGATA  
CGACAACGTTTGGGCTAACTTTAACATCATCTCAAAGCCGGTCTCCCTAAGGAGGT  
GGAGGAAAGCGTCAGGAACGATAAGAAGAAAGTGAGTGTGACATTCTCGTTGGCCAT  
TCACGCCCTAGCACACATGAAAATGGGCTTGTGCGTAGTGGGACAATGAAATTCGAT  
GTTACGTGCAAAGTGAAGTTGGATACGTTGGCCAAAACCACTCACGTACTCTCTCAAC

AATGCGAAACTAAACGACACTAG

>GmLEA2-30

ATGTCATAAAATAACAATAACCTCTCCAAAACACTGTGCTGACAAAGAAGGACTAAAAA  
TCAAGAACTACAAGAAGATCTACTTCACTTTCTCAGCATTTTTTCATCACAATCCTACTAC  
TAATACTTGTATATATGGCTCATCCTCCACCCTGCAAAGCCTCAATTCTCCCTCAAAGAAG  
TCGACATCTTCCAACCTAACCTTTTCAGGCCCAAACCTCAACTCCTCCATCCAACCTACC  
CTCCTCTCCAAAACCCCAAACCAGAAAGTTGGCATTACTACGACGAGATTCAACTCT  
ATGCAACCTACAAGGGCCAACAAATTACTGGTGATACCCCTGTGCCACCCTTTTATCAA  
GGCCAAGAAGAGAGTAATCTCATAACAGCTTCTTTGGTGGGAAATGCTTTACCCGTGG  
CTCCGTCTCTTGGCTATGAACTTGGTCGTGATCAAATTGTTGGAAGACTAGTCTTGAAT  
CTCAAAGCCAATGGAAAGCTTCGTTGGAAAGTGGGAACATGGGTCTCTGGACGTTACA  
GCATTTTGTACGCATTGATTACCAAGAGCTACTCTTTCATCTATGCGTCTATGCCAGCA  
TTTTTCGGAATTCATTGTTACATGCATATTCTGAAGCTGCCAGTTGAATATTTTGTGCTTA  
ACCATTTGTCCCATGAATACTGA

>GmLEA2-31

ATGAGTCGACACAATATTAATCCAATAGGATCACAATTTTTCTTGCGTACACCCGCATTG  
TTTTTTCCCAACAAGCAAGTTTGCAAAGGCAATAATCTCTATTACCCTCATTATCCAAA  
TCAGAAAAAATGGCCACTAGAGGCCTCAAATTTGCTTGGCCGTGTCTCTCTTTTCTT  
GATCATTCTTGCCATCGTTATTGTGACCTTAATTTTGACCATCTTTAAACCCAAGAACCC  
AGATATATTTCTCCACCCAGTTGACCTAGAAAACCTTCAATTGCTTTCACCTAATACAAC  
TAGTGCACCCTTAGGCATAGTGATCACAATTGTGAACCCTAATTATGGAACTTCAAGT  
ACGTGAATTCCAGTGGCTATCTTAAATATCGTGACACCATTATAGCCGAAGTCCATTGG  
GGATAAGATCATTCCCTGCTCGTAGCACTACCAATGTGAGCACTACTGTGGGTATTATG  
ACCGATAAATTGATACAAGATCCAAAGTTTTTGTGAGATATTGAAGGTGGGGTGTTCAA  
TTTGACAGCAGAGGCCACACTTCCTGGGAAAGTGACCATGATCAAGATTTTAAGGCTT  
AAGGCCAAGATTTATATCTCTTGTGGCGTCTCTTTCAACATAATTGCTGTGGATGCTAGT  
TCCAGCTGCATGTCCAAAATCAAATTGTGA

>GmLEA2-32

ATGACTGATAGGGTTCACCCTTCGGCCAAAACCACCGCCAACGCCGGCCCCAAGCCGA  
CATCCCCGCTACGAAATCCAGCTTTCGGCGCCAACCGCCCCACCTACCGCCCCCA  
ACCGCAGCACCACCGCCGCGCGGTAGTCGCGGATGTGCCTCCACCCTCTGCTGCTGG  
CTCCTCCTGATCCTCCTCTTCTCCTCCTCCTCGTCGGTGCCGCGGCACCGTCCTCTAC  
TTTCTCTACCGTCCCCAACGACCCACATTCTCCGTCACTCCCTAAACTCTCTTCTCCTC  
AACCTCACCACTCCCTCCACCATCAACGCCAAGTTTGACCTCACTCTCTCAACAATA  
ACCCTAACGACAAAATCATCTTCTCCTACGACCCTACCTCCGTATCCCTTCTCTACGGCG  
ACACCGCCGTCGCCAGCACCACCATCCCCTCCTTCCCTCCACCGCAAAGGAACACCAC  
CGTGCTCCAGGCTTATGTTACTAGCACTGAGGAAGTGGTGGATAGTGACGCCGCGATG  
GAGCTGAAGAGGAGCATGAAGAGGAAGAGTCAGCTGGTGGCGCTGAAGGTGGAGCT  
GGAGACCAAGGTGGAGGCCAGATGGGCGTGTTCAGACGCCTCGAGTCGGGATCAA  
GGTTCTGTGCGACGGCGTCCCGTATCTCTCCCCGACGATGAGAAACCGGCGACGGCG  
TCGGCTGAGAATACGGCGTGCCAGGTGGATGTGAGGTTTAAGGTCTGGAAATGGACCG  
TTGGATGA

>GmLEA2-33

ATGCAGATAACAACATCAAGAAGACCATAACCATAACCCTAATCACATCCTTCGCCCTAA

CCCTAACCTAACCTAACCTAACCTAACCAATACACACATTACCGCTTCCCTGGCAAAGTTC  
CCCACCACCAACACCAAGTCCACAACATGGACAAAGGCGCAGCTTCACGCTTCAAAC  
CCAATGCCCCCAAACGTGAACACTGCATTTGCATCACCGTTTTCCCTCCTACTCGGC  
ATCATACTCCTCGTTCTCTGGCTGGCCTACCACCCTACCAAGCCGCGCTTCACGGTGGC  
CAGCGCCGCGTCTACGGCCTCAACGCCACCTCGCCGCACTCATGTCAATCGCCATG  
CAGTTCAACATGGTCATAAGAAACCCTAACAGGCGCGTCTCAATTTCCCTTTGACAGGC  
TCTCCGCTACGTGTCCTACCGCAACCAGCCCCTTACGCCGCATGTCATGCTTCCGCCG  
CTCTTCATAGAGAAGCACAGCGCCGTGTCGCTGTCCCCGGAGATCGGAGGCGTGCCGG  
TGCCGGTGTGCGGAGGACGTCAGCAATGGACTGGCCATGGACGAGAATTATGGGGTGGT  
GGGCGTGAACCTTGTGTTGTTTGAAGGTTGAGGTGGAGAGCTGGTGACATAAACTCT  
GCACATTATGGATTGTATGTCAAGTGTGATGTTTTGATGGGTTTGAGGAAAGTTTTGT  
GGGTCAGTTCCCTCTTCTTGGTGCTCCAGTTTGTGATGTTAATACATGA

>GmLEA2-34

ATGGCGCACGGAAGACCGATTCCGACGTACGAGCATGGACACGTCATCGTCGCCAA  
AACCGCGCCGTTTACTACGTGCAGAGCCCCTCGCGCGACTCTCACGACGGCGACAAGTC  
GTCGACGGCGACGCACGCGACCGCGCGTGCAACAGCCCCGTGGACTCGCCCTCGCA  
CCATTCCCTACGGGCACCACTCTAGGGCTTCTTCTTCGAGCAGGGTCTCCGGCGGGTCTC  
ACAACATCGCCTCTTGGGGGAGGAAAGTGACCCGCAAAAACAAATTAGGGTGGCCTC  
ATGAGTGCAAGGTCATTGAGGAAGAAGAGGAAGGGTATTATGGGGAAAGACAAGGCT  
TTTCTAGGAAGACTCAGATCTTCGTTGGGGTCCCTTGGCTTTGCCTTCATTTTACCCCTC  
TTTGTTCATCATTGCTGCGGCTGCCAGGCCTTATAATGTTCCGGATCAGTGTTAAGAGTT  
TCACAGTACACAACCTTCTTATTCGGAGAAGGGTCGGATATGACAGGAGTTCCAACCAA  
GATGCTGACGGTAAATTGTTCCGGCGAGAATGACAGTGCATAACCCTGCAACCTTCTTC  
GGAATTCATGTCAGCTCTAAAGCAGTGAATCTTATGTATTCTGAGATGACAGTTGCAAC  
TGGTGAGCTGAAGAAGCATTATCTATCGAGAAAGAGTACCCGTACAGTGTCTGTGAAC  
CTGCAAGGAAGCAAGTTTTCTCTATATGGTGCTGATGCAAGCTTAACTGGCTTGGTGG  
ACAATGGAAAATAACCAATGACTCTTGTCTTTGAAGTTGGATCGCTAGGGAATATTGTT  
GGGAGGTTGGTGAGGTCCAAACATCGAAGGCGTGTCTCTTGCTCAGTGGCTATTGATT  
CCCACAACATCGAACCATCAAACCTTAAAGAGAATGCATGCACATACAATTGA

>GmLEA2-35

ATGACCGGGAAGGACGAGTTCATCCGCCTTACCCGAATCCGACTCAACCGCATCGGGA  
TCCGAACCAACCCGAGGCCATTCTCGACCTCTCCTTCTCCATCACCGTTAAAGTCCAC  
AATAGAGACTTCTTCTCCCTCACCTATGACACCCTCGCCGTCTCCGTCCGGTACCGCGG  
CCGCCAGCTCGGCTTCGTCACCGGCGGCGGCGGCGCCGCATCAGGGCGCGTGGCTC  
CTCCTACGTCGACGCCACGCTCACCATTGACGGATTTGAGGTTATCTACGACGCGTTCT  
ACCTGCTCGAAGATATCGCTAAGGGCGTCATTCCATTCGATACTGACACCCGAGTTGAA  
GGGAAATTAGGGCTTTTTCTTCTTCACTGTTCCCTTGAAGGCAACAGTGTGTCGCGAAG  
TGTATGTGAATATAAACCAGCAGACAATTGTACGTCAAGACTGCTATCCTAAGATCTTTT  
GTAGCTTAACTATTATGCAATAG

>GmLEA2-36

ATGCACGCAAAGACAGACTCAGAGGTAACAAGCCTCGCCGCGTCTTCCCCACGCGC  
TCCCCTCCACGCGTCTCTCTACTATGTTCACTCTCCCTCACGAGACTCTCACGACGG  
CGAGAAAACCGCAACGACGTCGTTTCACTCAACGCCCGTTCTCAGCCCCTCTGCCTCT  
CCTCCTCACTCGCGCACTCCTCCTCCACGCGCTTCTCCAAGAAAGACCATAGCCACA

GCCTCAAGCCGTGGAAGCAAATCGATGTTATTGAAGAAGAAGGGCTTCTTCAAGGGGA  
TGATCACCATAACGGGCTTCCACGTCGGTGCTACTTTCTCGCGTTCGTTGTTGGGTTTT  
TGGTTCTTCTCCTTCTTCTCGCTTATCCTTTGGGGGGCTAGTAGGCCCATGAAGCCCA  
AGATCAACATCAAGAGCATAAAGTTTGATCATGTTAGGGTCCAAGCAGGTTCGGATGC  
AACAGGGGTAGCCACCGATATGATTACATTGAATTCCACTTTGAAATTCGCATACCGCA  
ACACAGGCACATTTTTTGGGGTCCATGTCACATCCACACCCGTGGAAGTGCCTATTCA  
GACATTGTAATTGCTTCGGGAAATATGAAGAAGTTTTATCAATCTAGGAGGAGCCAAAG  
GTTGGTGAGTGTAGCAGTGATGGGTAAACAAGATCCCTCTATATGGAAGTGGTGCTAGCC  
TAAGTAGCACAACGGGTGTGCCACTGTGCCTGTGCTATTGAACCTCAACTTTGTGCTA  
CGATCTAGGGCTTATGTGCTTGGGAAATTGGTGAAGCCTAAATACTACAAAACCATTC  
ATGTTCCATAACTTTGGATCCAAAAAAGCTCAATGCTGCGATTTCCCTCAAGAAATCTT  
GCACATATGATTGA

>GmLEA2-37

ATGTGTTGCAGAAACCGCTTCATCGCCTGCACCTGCTGCATAATCATCACCTCTTCTTC  
ATGTTCATAAATTCATCATCGTCTGCATCTCACCTCAAGTGTCAAGTTCATGTAACC  
GATGCCTCCCTAACACAATTCACCTCACAAGCAACAACACTTTGTATTACAACCTGAA  
GGTCAACGTACAGTGAGAAACCCCAACAAGCACACCATAGTGTACTATAGGAGGATC  
ACAGTAATTTCTTGGTACAAAGATAATGCTTTTGGTTGGGTGAGCTTAACACCTTTGA  
CCAAGGCCACAAGAACAACCTTCCTTCAAGCAGTGTTTGAAGGGCAGAGGGTGAT  
TAAGCTCAAATCTAAACAACCTTGGTGAGTATAAAGATGAGACAAGTGTGGGATTTAC  
AAGGACCTTGCTGTGGATTTTGTATCTAGAATCAGAGCCAAGTATGGAAAGTTCAAGA  
GTAGTCGTTTCAATACACCCATTGTTTCAAGTGTGCGCCGATTGAGGGTTCCTTTGATTTCTA  
ATGGTAAATCAGTACCTCCTTTTGTGTCACCCAGATGCAAAAGTGCTTCTTCTTCTCA  
GATCGTGATGCGCCTGATGTTGATGGATAG

>GmLEA2-38

ATGTGTTGCAGAAACCGCTTCATCGCCTGCACCTGCTGCATAATCATCACCTCTTCTTC  
ATGTTCATAAATTCATCATCCTCTTTTGGATAATCATATCCCATCAAATGTCAAGTTCC  
ATGTAACCGATGCCTCCCTAACAGAATTCACCTCACAAGCAACAATACCTTGTATTAC  
AACCTAAAGGTCAACGTACAGTGAGAAACCCCAACAACAAAATCGTAGTGTACTATA  
GGAGGATCAAAGCAATAGCTTGGTACAAAGATAATGATTTTGGTTGGGTGAGCTTAAC  
ACCCTTTGACCAAGGCCACAAGAATACACTTTTCTTCAAGCAGTGTTTGAAGGGCAA  
AGAGTGATTAAGCTCAAACCTAAACAACCTTGGTGAGTACAAAGATGAGACAAGTGTG  
GGATTTACGAGGACTTGGCTGTGGATTTTGTATCTAGAATCAAAGCAAACCTTTGGAAG  
GTTCAAGAGTAGTCGTTTCGATCCACCCGTGTTTCAAGTGTGCGCCGTTTGAAGGTTCTT  
TGATTTCTAATGGTAAAACCTGCACCTCCTTTTGTGTCACCAAATGTAAAATTGATGGTT  
CTTCTTTGACAGATCGTGATTCTCAAGCAGAAGCTAGATAG

>GmLEA2-39

ATGTGTTTCAGATCGCGTTGCAGCTTCTGCTATATCTTCTTCAATCTACACCTTATG  
CTCATGTTCAATCTTTCCATCATCCTCTTCTGGATAATCATCTCACCTCAAGTGTCAAG  
TTCCATGTAACCGATGCCTCACTAACACAATTCACCTCACAAGCAACAACACATTGTA  
CTACAACCTCAAAGTCAACGTACAATGAGAAACCCCAACAACAACATCATAGTGTAC  
TACAGGAGGATCACAGCAATTTCTTGGTACAAAGATAATGCTTTTGGTTGGGTGAGCTT  
AACACCTTTGACCAAGGCCACAAGAACAACCTTCCTTCAAGCAGTGTTTGAAGG  
GCAGAGGGTGATTAAGCTCAAATCTAAACAACCTTGGTGAGTATAAAGATGAGACAAGT

GTTGGGATTTACAAGGACCTTGCTGTGGATTTTGATCTTAGAATCAGAGCCAAGTATGC  
AAAGTTCAAGAGTAGTCGTTTCAATACACCCATTGTTCAAGTGTGCGCCGATTGAGGGTTC  
CTTTGATTTCTAATGGTAAATCAGTACCTCCTTTTAGTGTACCAGATGCAAAAGTGCTT  
ATTTCTTCTCAGATCGTGATGCTGCTGATGGATAG

>GmLEA2-40

ATGGCTCAGAGCCCTGATCAGCAGATGAAGCCCTTAGCTCCATTTCGTATCATCAACAAG  
CCACTTCAGCAGACAAGAAGATCATGATCAGTTTCAAGACACATCCGAACAGAAAATC  
ATTCGCATAAGAAAGTTCGTGTTGTGCTGCGGTTGCTTCACTGCCCTTGTGCTGATACT  
TGTGGTCGTAATCATAGTCTTGGGCTTACCGTTTACAATGTCAAAGAACCCGAGGTGA  
GTATGAATTCGGTTACTCTTGTAAAGTGGAACTTTTGCAAACAGTGGTGCCACAAACAA  
CGTTACACTTCTTGTGATATCTCTGTAAAGAACACAAACGCTTTTACCCTCAGGTTTG  
GAAAACTACCACCATTTACTATGGTGGTATGGGAATAGGTGAGGGTACTTCTCCA  
CCGGGTAAGGCCAAGGCAAGAAGGACCATAAGGGTAAACTCGACCTTGGAGATTATG  
GCAAAGAAGCTTTTAGATATCCCAACTTTGAATATTGACCTCAGGGATCAATCTTTGAAT  
ATCAGCAGCTATAACCAGGATAGATGGTAAGGTGAAAATACTCAACATGTTTCCGAGGAA  
GGTTGTGGTTGAGCTTAATTGCACCATTGGATAAACATCACCCTGGGTTGGTCACAA  
ATGGTGACAATTGTCTTGGAAACCGTTGATATTTAG

>GmLEA2-41

ATGGCCGCGGAGCCGCGCCGGTACCGGCGCCGAGGCCGAAGCGGCCTCGGCCTCCG  
TCGGGGCGCACCAACCTCGCCTCCTGCGTGGTGGCCACCATCTTCCTAATCTTCATCGT  
CATCGTCATCCTCATTGTCTACTACACCATCTTCAAACCCCAAGACCCCAAATTGCCG  
TTAACGCCGTCCAGCTCCCTCCTTCTCCGTCGCTAACGGCACCGTCAACTTCACCTTC  
TCCCAGTACGCCTCCGTTAGAAACCCTAACCGCGCCGCATTCTCGCACTACGACAGCT  
CCCTCCAGCTCATCTACTCCGGCAGCCAGGTCCGGTTCATGTTTCATCCCCGCCGGCGAG  
ATCGACGCGGGCCGGACGCAGTACATGGCCGCCACCTTCTCCGTCCAGTCCTTCCCCC  
TCTCGGCGCCGCTCGAATGGGCCCCACATTGGCCAACGGCGACGGAGTGGGCTTCA  
ACTATGGGCTTAGGGTTGAGCCCACTTTGGAAATCGAGTCTAAGTTGGAGATGGCGGG  
GCGCGTCAAAGTGTTGCACTTTTTACCCATCACGTTTACGCCAAAGCCGGTTGCAGG  
GTTGCCATTGCCGTAACCTGATGGATCTGTCTTAGGTTTTCACTGCTAA

>GmLEA2-42

ATGAACACAAGAGCGGGAGCTAACTCAGAATCCCAGCCACAGCCATCAAGACGACAA  
CAGCACCTCCACTACGCCAGCTCCCCAACGACGTCGTCTCATTCTTCATGCTGCTGCTG  
CCTCTTCTCCTTCTTCTCCTTCTCGCTCTTTAGTCTCGCCGCGCTTCTCGTAATCGT  
GCTCGCCATCAAGCCCAAAGCCCGCACCTGGACCTCCGCCAAGTGGGCCTCCAGTAC  
ATGGCCCTCGTGCCCAACCCAACTCGCCAGGCCATCGACCGCGAAGCTCTACCTCG  
TGATCCGGTTGGTGTGGCGGTGGTGAACCCGAACGAGGTGGGGATCAGGTGCGGCG  
AGTCCAGAGTCACGGTTCGTGTACCGGGACACACCCTTGGGCAGGACCTCCCTGCCCC  
CGTTCTGCCAGCGCGCTCACACCGTGAAGGAGGTGGTGGCCACCATGGCAGTGGATG  
ACGTTAACTTGTCCAACGCCGATGGTGTGACTTCGCCAGAGACGCGTTGCTCAATGA  
CAGGGTTCGAGCTGAGGGTGTGGCCCATGTGCGCCACCAAGATTGCCTCTTCAACCTA  
CCATCTCCTCACTTCAGGTCTCAGTGAATTGTGTAATAGTGATAAGTCCAAGAAAGCA  
ATCTCTAACTTACAAGCAGTGTGGATTTCGAGGGATTGAATTAA

>GmLEA2-43

ATGGAGGGGCACGCCGACCACAACCTCCGCCGTGTTGCCGCCACCTCCTGGCCGCCAC

GCCCCAGCCGCAGGCACGTACATCGTGCAGTTCCCGAAGGACCAAGTGTACCGCGTTC  
CACCACGCGAGAACGCGTTGATCGTGGAACAGTACCGCAACCCGGCCACCGCGAAAA  
AAAGACGCGGCGGTTGTTGTTGCTGTTGCAACCGTTCGTGTCTTGATAACCTTCGCTCTC  
GTGGTTACCACAATCGTTGCCGTGGTTGGCATCACGTTGGCCACGTTGTACTTTATTTTC  
AGCCCCGCGGGTCCCAAGTTTACTGTCTCCCATGTGGCGGTGAATAGGAACAACAAGA  
ACTCGCAGGGGGCGGCGGCGCAGTATGAGGTTTCGTTGAGAGCGAGGAATCCGAACG  
AGAAGTTGGCGATTAGTACCAGGAAGGGGACGTGTCGCTGTTGTTGTTTCGATGAGAG  
TAAGGTTGCCGAGGGGAAGTTTCCAACGTTGGAGCAAGGGGGAGGTGAGGCGAGTG  
AGGTTAAGCTTGAGCTGACCGGATCCAGTGGAGCGTTTCCCAGGGGAATGCATGGTGG  
GGACGCAGCCGTGGATTTGAAATTGGAGATCAAACCTTGCATAAGGATTAGGACCGCG  
GGTCTCGAAACGTGGGGTATGAGCTCCAATGTGGCGTGTGAGTTTAAGGTCAGTGGTC  
TCGGTAACGACACGAGAATCTTGTCAACAATGTGATACCAAATCAAGCAATATTGA  
>GmLEA2-44

ATGACCACCCCAAGAGGAAACCACCACCACAGCCTAACGGTGAGCGAAGAAGACAA  
TGGCCACCGCCACAGCCACCAGCAGCGGCACCGGAAGCGGCAGCGGCACCGACAGC  
AGTAGCCGCAAATTACAATGGATACCGACAGTACCACCCGACAACGCCAGCTCGTTCCG  
TCGTCTCGGCGTTCGTTCAAAGGATGCTGTTGCTGTCTGTTCCCTTCTATTCTCGTTCCCTG  
GCGCTGTTGGTGCTAGCGGTGGTGCTGGTAATAATCCTAGCGGTGAAGCCGAAGAAGC  
CGCAGTTCGATCTGGAGCAAGTCGGGGTGCAGTACATGGGCATCACACCCAATTCCCC  
CTCCACCGCTTCCCTGTCTCTCACCATTCGCCTCCTCTTCGCCGCCACCAACCCCAACA  
AGGTCGGGATCAGGTACGGCCAGTCCAGCTTACCGTCATGTACCGCGGCATCCCCCT  
CGGAAAAGCCACCGTCCCCGGCTTCTTCCAGCAACCTCACAGCACCCGACAGGTGAT  
CGCCACCATCGCCGTCGATCGCGTCAATTTGCTTACAGGCGGACGCCGCCGATTTGATCC  
GAGACGCCTCCCTCAACGACCGAGTCGACCTGAGAGTCTTGGGAGACGTTGCTGCCA  
AGATCCGCGTCATCAACTTCGATTCTCCTGCTGTTCAAGTTTCGGTGGATTGTGCTATAG  
TGATCAGTCCAAGAAAGCAATCTCTGACTTACAAGCAGTGTGGGTTTCGATGGATTGAC  
TGTTTGA

>GmLEA2-45  
ATGAAAAAGGGATTTGGCTGCAAAGGAAGCATTATGTGCCTAGTGGTAGCATTATGTGT  
AGCGATTGCACTTGTATTGTTAGGGGTGATCTTAGCATTGACGGTGTTCAAACCAAGGC  
ACCCCATACCAATGTGGATTCAGTAAGGCTTCAGAACATGAGCTTGGCCATGGACATA  
TTAGCATGAGTGTAATGTGAACTTGACATTAGAAGTGGATGTTTCAGTCAACAACCC  
TAATAAGCTTGGATTCAATTACTACAATAGCTTTGCCCAACTCAACTATAAAGGGCAGTT  
GATTGGGGAAGCTCCTATCCCTAATGGAGACATATTAGCTGAGGAGATTAAGGGACTCA  
ACTTGACACTCATTGTTATGGCTGATCGTTTGGTCTCCAATTCTAATGTCACCAAGGATG  
TTGCATTGGGTTCAATGCCCTCAACACCTTAGTGAGAATTTTTTGCCAAGTCAACATC  
TTAGGGTTTATGAAATCTATGTGGCTTCCACCTCATCACCAAAAATCCCCATTTCCTC  
GACTTCAAGAAATTTGTACAAAGGAGCAAAGTTGTCCCCATTCACTTCAATTTAG

>GmLEA2-46  
ATGCACGCAAAGACAGACTCAGAGGTAACAAGCCTCGCCGCGTCTTCCCCACGCGC  
TCCCCTCCACGCGTCTCTTTACTACGTTAGTCTCCCTCGCGAGATTCTCACGACGG  
CGAGAAAACCGCAACGACGTCGTTTCACTCCACGCCCGTTCTCAGCCCCTCTGCTTCC  
CCTCCTCACTCGCGCCACTCCTCTTCCACGCGCTTCTCGAAGAAGGACCATAGCCATAG  
TCTTAAGCCGTGGAAGCAAATCGATGTTATTGAAGAAGAAGGGCTTCTTCAAGGGGAT

GATCGCCGCAACGGGCTTCCACGTCGGTGCTACTTTCTTGCTTTCGTTGTTGGGTTTTT  
GGTTCTCTTCTCGTTCTTCTCGCTTATCCTTTGGGGGGCTAGTAGACCCATGAAGCCCA  
AGATCACCATCAGGAGCATAACGTTTGATCATGTAAGGGTCCAAGCTGGTTCGGATGC  
AACAGGGGTAGCCACCGATATGATCACATTGAATTCCACTTTGAAATTCACATACCGCA  
ACACAGGCACATTTTTTGGGGTCCATGTCACATCCACACCCGTGGAACCTTTCTTATTCA  
GACATTGTAATTGCTGCGGAAATTTGAAGAAGTTTTATCAATCTAGGAGGAGCCAAA  
GATTGCTGAGTGTATCAGTGATGGGTAACAAGATCCCTCTATATGGAAGTGGTGCTAGC  
CTAAGTAGCACAACGGGTGTGCCAACACTGCCTGTGCCATTGAACCTCAGCTTTGTGC  
TACGATCTAGGGCTTATGTGCTTGGGAAATTGGTGAAGCCTAAGTACTACAAAACCATT  
AAATGTTCCATCACATTGGATCCCAAAAAGCTCAATGCTGCTATTTCCCTCAAGAAATC  
TTGCACATATGATTAA

>GmLEA2-47

ATGATCGGGAAGGACGAGTTCGTCTTACTCGCCCCTTCCCTCCAACCCTAACCCCTAA  
CCCTAACCCCTAACCCCTAACCCCAACCCCAACCCTTATCCCAATCCTAATCCTTATTACGA  
CCCTAACCCCTCATCCTTACCCCAAAAACGTCGTCGTTTTGCTCCCCTCCTACCGTCCCA  
TTCCAGCGTCGTCGCGCCGCTGCATCATCTACTCCGCGCACTCTTCCCTCTTCCCTCCT  
CGTCGCTGGCGCCGCTTCCCTCCTTACCCTCCGACCCGGAGATTTCGTCTCGCTCGGA  
TCCGACTCGACCGCATCGGGATCCGAACCAACCCGAGGCCATTCTCGACCTCTCATT  
CTCCCTCACCGTTAAAGTTCGCAACAGAGACTTTTTCTCCCTTTCCTATGACTCCCTCA  
CCGTCTCCGTCCGCTACCGCGCCGCCAGCTCGGCTTCGTAACCGCCGGCGGCGGCAG  
CATCAGGGCGCGCGGCTCCTCCTACGTTGACGCCACGCTCACCATCGACGGATTTGAG  
GTTATCTACGATGCGTTCTACTTGCTCGAAGATATCGCTAAGGGTGTGATTCCGTTTGAC  
ACTGACACGCGAGTTGAAGGGAAATTAGGCCTTTTCTTCTTCACTGTTCCCTTTGAAGG  
CAACAGTGTGTCGGAAGTGGATGTGAATATAAACCAGCAGACAATTGTACGACAAGA  
CTGCTATCCTAAGTCACTAGGTGATCCGCTGGATGAGAGCGCATATATTGAAGCTGGAG  
ATACATGA

>GmLEA2-48

ATGGCGCACGCCAAGACCGATTCCGACGTCACCAGCATGGACACGTCATCGTCGCCAA  
AACGCGCCGTTTACTACGTGCAGAGTCCCTCGCGCGACTCTCACGACGGCGACAAGTC  
ATCGACGGCGACGCACGCCACGCCGCGGTGCAACAGCCCCGTGGACTCGCCGTCGCA  
CCACTCCTACGTCCACCACTCTAGGGCTTCCCTTTCGAGCAGGGTCTCCGCCGGCTCCT  
ACAACAATATCGCCTCTTACTGGGGGAGGAATAATAAAGGGACCCGCAAAAACAAATT  
AGGGTCATGGACTCATGATCAGTGCAAGGTCATTCAGGAAGAGGAAGGGTATTATGGG  
GAAAGAGAAGGCTTTTCTAGGAGGAAGACTCAGATCTTCGTTGGGATCCTAGCCTTTG  
CCTTCATTTTTACCCTCTTTTGTTCATCATTGCTGGGGTTGCCAGGCCACACAAAGTT  
CGGATCAGTGTTAAGAGTTTACAGTACACAACCTTCTTATTCCGAGAAGGGTTGGATT  
GACAGGAGTTCCAACCAAGATGCTGACAGTAAATTGTTTCAGTAAGAATGACAGTGCAT  
AACCTTGCAACCTTCTTCGGAATTCATGTCAGCTCTAAAGCAGTGAATCTTATGTATTCT  
GAGATGACAGTTGCAACTGGTGAGCTGAATAAGCATTATCTACCAAGAAAGAGTACCC  
GGATAGTGTCGTTGAATCTGCAAGGAAGCAAGGTTTTCTCTATATGGTGCTGGTGCTAGC  
TTAATTGGCTTGGTGGACAATGGAAAATACCAATGACTCTTGTCTTTGATGTTAGATC  
GCGAGGGAATATTGTTGGGAAGTTGGTGATGTCCAACATCGGAGGCGTGTCTCTTGC  
TCAGTGGCTATTGATTCCCAACAACATCAAACCCATCAAACCTTAAGGAGAATGCATGCAC  
ATACAACCTGA

>GmLEA2-49

ATGCCGTCCCACGATCACGTGGCCGAACGCCAGCACCATAGACCAATCAGAAGAAGAT  
TGGTGAACACTCACCACAGCGGCAAAACACACCCCTCTAATCTGGCTAGCAGCCATTCT  
CTGCACCATCATAGCCATAGGAGTGGTGATAGCCGGCATAAGTAGTGTTCGTGGGTTACA  
TGGTGATCCACCCTAGAATCCCAGTTATGAGCATCACCAACGCCACCTCGATCTTCTC  
AGCAACGACTACGCAGGGCTCCTCCAGACGCAGCTCACCATCATCGTCGTGGCTCAGA  
ACGGCAACGCCAAGGCCCATGCAACCTTCTCCGACATTAGGTTTAACTCAGCTACCA  
GGGACAGAGAATTGCGCTCATGCGCGCTCCGCCGTTTCGATGTCCCAAGAACAGCTCC  
AAATCACTCAACTACGTTGTTTCGGGCGGCTTCCATTCCCTTAACTCCCCAACAGATGGA  
GGAGGTGGACGAGTCGTGGAAGCGTGACGTCATTGGCTTTGACTTGAAGGGCAGCGC  
CAGGACTCGGTGGAGGGTTGGCCCTTTAGGTTCTGTAAAGTTCTGGTGCAATTTGGAG  
TGTCAGCTCAAGTTTCATCCTTCTAATGGCTCTTACATTCATCACTCTCGCTGCACCTCT  
AAGTCTAAATGA

>GmLEA2-50

ATGTCCCATCTAAACGGCGCCTACTACGGCCCCGCGTTCCCCCGCCGAAATCCTACCA  
CCGTCCCTCCCACGGCGGGCGGGCCGCGACGGCTGCTGCTGCGGCTGCCTGAGCTG  
CTTCTGTGGCTGCATCTTCGACTGCATCCTCGGCCTAATCTGCAAGATCCTGACCACAA  
TCATCATAATCCTGGCAGTTCTCGCTTTTCTGTTCTGGTTTATCGTGCGCCCAACGTGA  
TCAAATTCACGTCACAGACGCCTCCCTCACGCGTTTCGACTACACCACCAACAACAC  
TCTCCACTATGACCTCACTCTCAACGTGTGCATCCGCAACCCGAACCGCAGGGTTCGGC  
GTCTACTACGATCAAATCGAAGCGCTCGCGCTGTACGAGGATGTTTTGTTTCGGGAACCT  
GACATTGGGTTCTTTCTACCAGCACCACAAGAACACCACCTTCGTGAGTCCCATTTTCA  
AGGGCCAGCGCGTGACTCCACTCGCCAAGGTCCAGGTTTCGGAGTTTGACAAGGAAA  
AGGGTTCTGGGGTTTACACCATAGATTTGAAGCTTTCATGACGGTTCGGTTCAAGTTC  
TTGCTGTTCAAGAGTGGGAGTTTGAAGCCCAAGATTCGGTGTGCGTTGCACGTGCCAC  
TGAAATCGCGTAACGCAACAACCTCTCCGGACGCTGCGTTTCAACCCACTGAGTGCGA  
TTGGGATTACGGGAAAAAGTGGTGGATCCATTAG

>GmLEA2-51

ATGGCTGATAAGCAATCCCAACTAAACGGTGCATATTACGGCCCCGCAATCCCTCCATC  
GGAGCTGCCACGTCACCACCACCGTGGCCGACGCTGCTGCTGTTGCCTCTTCAGCTTC  
TTCTGGAAGCTTCTCCTTGCCATCGTCGTTCTCCTCGTTGTCGATTCTCGTCTTCTGG  
GCTGTGGTCCAGCCACGCACCTTCAAGCTCCATGTCACCGACGCCAACTCACCCAAT  
TCAACCTCACCAACAACAATAATAACATTAACATGCTCCGCTACAATCTCGTTCTC  
AATCTCACTGCACGAAACCCTAACAAAAAACTCAACATCTACTACGACCAAGTGGAGG  
GCCACGTGTCTACGAGGGGATGAGGTTTCGCTCAGCGGACCTGATCACATGGCGAAA  
CTCCTTCCGCCAATACACAAAGAGCACGAACAACATGAGCGGGGTTTTACGGGGCA  
GCACGGGTTGGTGTTCGATGGCGATCACGTGAAGGATTCGAAAAAGATGAGAGAGG  
TGGGGTTTTTGATATTGATGTGAAGCTTTACTTTAACATTAGGTTTAGGCTTGGTGACTT  
CATAGGAAGTAGCTCAAGGGTTAGGGCGAAGTGCGAGCTTCAGGTTCTTTGGTTTCG  
AGGGGAGTGTTTCTTCCCACCAGGTGCCATGTCAAATTCTGA

>GmLEA2-52

ATGTCGGTGAAGGAGTGCGAGCACCACAAGGGGAAGAAGAGGAAGATCTTCCGGCA  
AGTGTTCGTGGTGTCTAGTGGTGTTCCTTTTCATCGTGCTGGTCACAATCTTTTGATATG  
GGCAATCCTTAGACCCACCAAAACCCACCTTACGCTCCAAGACGTCACCGTCTACGCC



TTCAACGCCACCGTGGCGAACTTCCTCACTTCGAATTTTCAGGTCACGCTCATCTCGCG  
TAACCCGAACGACCGCATCGGTGTTTACTATGATCGCCTCGAAACCTTCGTGACCTACC  
GGAGCCAGCAGGTCACGTACCGAACCGCCATCCCTCCGACATATCAAGGCCATAAAGA  
GATCAATGTTTGGTCTCCGTTTGTATGGCACCAACATCCCCGTCGCGCCGTTCAATTT  
CCTCGGCCTCAGCCAGGACCAGAGTAACGGTAACGTCCTCGTCACCATCCGAGCCGAG  
GGTAGGGTTCGTTGGAAGGTCGGCACCTTCATCTCCGGCCGCTACCACCTCTACGTCC  
GCTGCCCGGCGTTCATCAGCTTTGGACCCCGCAGCAATGGAATCGTCGTCGGAGAGAA  
CGCCATCAAGTTCAGATTATCCAACGGTGCTCCGTTAGTGTCTAA

>GmLEA2-53

ATGGCAGATCATCAGAGACTGAGGATCCACCCTATGGAGGGGGAAGCACCACCGCCCC  
CAACAACCTCCATTGGTCCCTCCAGGCTCATCAAGATCAGAAAAGGGTGTTCCTTTGCA  
CCATCCTCCACCTCTACCACGTGCTATGCCAGCAGCATAACCCTACACCACACAAAAGA  
AGCTCAAGCTGTTGCTGCAAGTGCATATGCTGGACAATAATCTTGTTGTTCTCCTCCT  
CATTATCTTTGCAGCAAGTGTGGAATCCTTTATCTAGTCTTCCAACCAAAGCTTCCTGA  
TTACTCAGTTGACACTCTCAGGATAAGTGATCTGAGGCTTAACTTTGACATGAGCCTCT  
ATGCAAAGTTTGATGTGAAGATCACAGCAACCAACCCAAACAAGAAGATTGGCATCTA  
CTATGAAAAGGGTGGAAAGTTGAGTGTGTGGTACACAAACACAAGGCTCTGTGAAGG  
GTCACTGCCACAATTCTACCAAGGTCATGAGAACAAAACAGTGCTCAATGTGTCTTG  
AGTGGTCAAGTGCAGTCTGGAAGCACCTAATGAATGCACTGCAGCAGCAACAGCAG  
ACAGGGCGCATTCATTGGATCTCAAGGTGCATGCACCAATAGCCATCAAACCTGGGA  
GGTTGAAGCTGATGAAGGTGAGAGTGTGGGAGAATGCCTTTTGGTGGTGGATAGCTT  
GTCATCTAATAATCTCATAAGCATCAAGGCTAGCAACTGCAAGTTTAGATTGAACTTT  
GA

>GmLEA2-54

ATGCACAACAACGACCACATAACCGTTCACCACGTGCAGGGTCCAACCCGAAGCCCG  
TGAAACTGAACCGGCACCACACGATGCGGTAACGTCACCGGGTCCACGAAAGCC  
TCACAACCCGCGTCTCCAAGATGATCTGCGCTACCTTCTTAGGCCTTCTTTTTATTGTGG  
GCCTCATCACCTTCATCCTCTGGCTCAGCCTCCGGCCCCACAGGCCAGGTTCCACATC  
CAGGAGTTCAACTTGCCGGGCCTGACCCAAAACCTCCGGGTTCGAAAACGCCGTCATA  
ACGTTCAAAGTATCCGCGCGAAACTCCAACCAGAACATCGGGGTTTACTACGAGTCCA  
TGACCGCGCCGTTTATTACCGGGACCAGAAAATCGGGTCCAAGCCGTTACTTTACCC  
GTTTTATCAGCAGCCCAAGAACACGACGGAGGTGGACGGCGATCTTAGTGGGGCGAC  
GTTGACCGTTAGTAGTCAGCGCTGGTCCGAGTTCAGAGCGATAGGGCTGACGGTAGC  
GTGGTGTTCGCTTGGAATTGACATCTGTGATCAGATTCAAGATATCCACGTGGGACAG  
CAAGCGCCACACGATGCACGCCAACTGTAATGTGGGCGTGGGACCCGATGGTTCCCTC  
TTGACCCTTTACAAGGACAAGAGGTGCCCGTTTATTTCTCTTGA

>GmLEA2-55

ATGTGTGAAGGCAAGAGTCTCTACATATGGCCCCTGAAAGTTATAGGCCTCTTAGGCCT  
TATTGTTCTGTGCCTGTGGCTGGCCTTACGTCCCAAGAACCCTCCTACTCCATTATGTT  
CATCTCCATAACAATCCCTCCAACCTCAAGTGAACCTGCACCATCTTTTACAGCCTTC  
AAATTGAAAACCCAAACAAGGACTCGAGCATTTACTATGACAAAACGATTTAAGTTT  
CTTATATGGGGAGCCTGAGGACGAGGTGGGGGAGACAACCTATAGTCCCATTCCATCAA  
GGAACCTGGCAACACCCGGGATGTATCTGATACTGTTAATGCCAAACCTCGACCATCAA  
ACCTCTCTCAGTGCCATCTCAAATGCAACCACAGAGTTAAAAGTTGCTTTGATCACAA

GATACCGATAACAAGACATGGGGAATTAAGAGCAAGTTCCACGGGTACAACCTCAAAGG  
TATTCTACCAATTGATTCCGATGGGAAGCTCTCACGTAAGAAGAAAAAGTACCCACTTA  
GCCGTAATCCAACAACTAGGAAGGTTCAAATAAGGCACTGA

>GmLEA2-56

ATGACAACAGAGGAAGTGATCACCATGTTCCCATCACGCAAAGAAGAAAAACAAAGC  
AGCAGCAAGTGTTTGGTGTATGCTTTGGTTGTCCTTGTAGCCATATTGTTCAATTTGGCTT  
GTTTTTGCATCTATCGTGTGCGCGTGGTTGATCCCCAGATTCAGTTGAAATCAGCTAGA  
TTGATGCACAACACTAAAAATCATAGTTTTTTCATCAACTTCTTCCTTGAACGTGACTATG  
ATTGCTCGTGTGTCCCTCACGAATCCAACTTGTTCCGGTCGCTTCTATTACGGGAACAG  
TAGAGTGAGTGTGCTATATGGGGCTTCTATAGTTGGTGTGCTTGGGAATTGGAAGGTGCGA  
GATTGGAGGGTAGAGAAACCAAAGAAATCGATTTTCATGGTTCACATGAGGTTTCAGCAC  
TAAGCTATTGGTAATAATGAGAAATCTAACCAATGACACTGCCACTCTGACTCTGCAG  
GCATGCTTAAACTCAGAAGCTACGCAAAATTAAGTGGTACAGTGCACGTGCTGAACAT  
GGTAAATAAGAAAAAGACCTTAGGAATGGCTTGTATTATGAATCTCAACCTGACCTCAT  
ATTCCACACAACATTTCCAATGCTAA

>GmLEA2-57

ATGGCCAAGTCCATAGAGCAAGAAGGAAGAAGCGGCAAGTGTTTCGTATATTTTCTGG  
GCGCCTTTGTATCTTATGCGCACTTGTATTGGTTTTTGCCTCCATATTGCGCCTCAAGA  
ATCCATATCTCAAATTAAGATCAGCTACTTTCAACCAAATCCGTTACAGCGCTTCACCAT  
CACCTTCCTTCAACGCCACCCTCATCATCTTTCTTGCCCTCAACAACCAACTTTTCGGT  
GCCTTCACTTACGAGAATAACAGCCTCAGTGTGCTCTATGCGGGTCTAAAGATCGCTCA  
TAGCCAAATCAACGGTGGCAGGGTGAGTTTCAGACAAACCAAAGAAATTCATGTTACT  
GTGAAATTCATGTCCGCTATTGACATTACTTCGGGGTCGTTGAATCTCACCCTAATGTC  
TTTTTTAGTGGCAAAGTTCATCTGTTTAAAGATTATTAACATCAGAAAGACCATTGAAATG  
CCTTGCTCTATGAACCTCAACTTTACCTCTCACGCAACTCAGGCTATTCAATGCCAATA  
G

>GmLEA2-58

ATGGGAGGAAGAATGCACACGAAATCAGACTCGGAGGTTACGAGCAACAGCATGGAG  
CAGTCGTCACCGTCGCGTTCCTCCCGCGGCGGCACTCTACTACGTGCAGAGCCCTT  
CGAACACGACGTGGAGAAAATGTCGTACGGTTCAAGCCCCATGGGTTCCCTCACCA  
CCATTTCCACTACTACTCTCTTCCCCCATCCACCCTCCCGCAATCCTCCACCTCTCG  
CTTCTCCGCTTCCCTCAAAAACCCTCGCAGCAACTTCTCCTCCTCCTCCTGGAAGA  
AGCTCCACCCACACCCCAACCCCGACGCCGCTCGACGACGACGACGACGACGACG  
ACGGCGACGACGACCTCAACCACTTCCCCCGCAACCTCCGCCTCTACTTCTGCTTCTTC  
CTCCTCTTTCTTCTTTTTTACCCCTCTTCTTTTGATCCTATGGGGCACCAGCAAGAGC  
TACAAGCCTCGAATCATTGTCAAGAGTATAGTGTTCGAGAACTTGAATGTTTCAGTCAGG  
AAACGATGGAACCTGGGGTACCCACTGATATGTTGTCGTTGAACTCAACGGTCAGAATT  
TTGTATAGAAACCCAGCCACTTTCTTCGGCGTTCATGTCACCTTCTACCCCTCTTCACCTT  
AGCTATTACCAGCTTGCAATTGCCTCTGGCCAGATGCAGAAGTTCTATCAATCGAGGAA  
GAGTCAGCGGAAGTTGGCGGTAGTGGTGTAGGACACCAGATTCTCTCTATGGAGGA  
GTGTCAGTTCTTGAAATACTAAAGAGCACTTGGAGAACGTTGCATTGCCACTAAAAC  
TGACATTTGTAGTGAGATCAAGGGCTTTTCATCTTGGGAAGATTAGTTAAGTCTAAATTCT  
ATCGAAGAATCACATGTTCTGTCACTTTGCATGGCAACAACTTGGAAAACATCTTAAT  
TTGACGGATTCATGTGTCTACAAGTGA

>GmLEA2-59

ATGTCCGTCAAAGAGTGCGGCCACCACTCCTCCCAACGCCGCAACCTCCTCCGCCTCA  
TCCTCGGGCCACCGCCGCCTTCGTCTCTCCTCATCTCCTCACCATCTTCTCATCTGG  
GTCATCTCCGCCACAAAGCCCCGCTTCACTCTCCAAGATGCCACCCTCTACGCCTT  
CAACCTCTCCACTCCCACACCCAACACCCTCACCTCACCATGCAGGTCACCCTCTCC  
TCCCACAACCCCAACGCGCGCGTTCGGCGTCTACTACCACGCGCTCCACGTCTACGCCT  
CCTACCGGAGCCAGCAGATCTCCCTCGCCACCGCGCTCCCCGACACCTACCAGGGCCA  
CCGCGACTTCGCCGTCTGGTCGCCGTTTCTATTTCGGTAACGTCGTCCCCGTCTCGCCGT  
TTGTGCTCAGCTCACTGCAGCAGGACCAGAGCGCTGCCGGCGCCGTTTTGGTCAACGT  
TAAGGTCAACGGGAGGGTCAAGTGGAAGGTTCGGGTCTTGGGTCTCTGGGAGGTACCA  
TATCTATGTGAACTGTCCCGGTATATTAGCTTCGCCGGAGATCGGAGCATTGCCGCCG  
GAGGACTCGTGGCTTCGCCGGTGAAGTTTCGCCTCTTGCAGAGTTGCAGTGTTGATGT  
GTAG

>GmLEA2-60

ATGGACAACAAAAGTCAAATGGAGTTGGAGTTCAGCAATAATCGGAGCAGCATCC  
GCAGTGGCAGCATCAGCCCTAATATCCGCGAAACCCAAGGACCCAACATTTACCTCA  
TTTCATAAACTTCACCTCTTTAAACTCAATTTCCCTCTCTTAGACGCAGAGGTTCTCC  
TCACGGTCCACGTCACCAACCCTAATATCGCCCCATCCACTACTCCTCCACTTCCATGT  
CCATCTTCTACCAAGGTTCTCTTCTCGGCTCGGCTCAGGTTCAAGCCGGCTCCCAGCCG  
CCCCGCTCCTGCCAGCTCCTCCGCCTCCCCGCACGCCTCCACGCGCTCGAGCTCGCTC  
ACCACGCCACGCGCTTCTTCCACGACGTCGCGCGCCGCGAGATGTTCTCGACGCCGC  
GGTTGATATCGCCGGCACCGCCAGGGTCATGTGGTGGGACCATAACTTCAAGGTCCAC  
GTGGACAGCCACGTCACCGTCGATCCCGTGTTCCTCGACGTCATTGATCAGGAAAACA  
CCTCCGAGCTTGAAGTATTCACCGCAGCGCGTGGGGAGTGAGCAATGA

>GmLEA2-61

ATGGAGGAGGGAAAGAGCAAGTCTACATTGGCGAAGAATCCGAGCCGCAGCCGGAAT  
CCGAGCCGGCGTGTGGCCTTGGACGTGCCCTCCCCTCGCCACATGGGCTCCACCCTCA  
GTGGCATCCATTCCTCCATCGACCACCTTGACAAGGGACGTTACCACCCATGTTGCTTT  
GCATGTTGTGCATGGTCATGCCTTATTGTGTTTCATCTTAATCATAGCCATTCTCTTTCTG  
GTATTACCTACTTGGCTTTTCTCAAGTCAGGGATGCCAAAATTAACGTGAGAGCCTTC  
AACATAACAAAGTTTCAAGTTGATGATGGGTACAAAAGATGAATTCGGTTATAGGCTT  
AGGATTAATATTCTCTAACAAGAATGATAAGCTTAAGCTTTTGTATGGCCTCTTGATGT  
TGATGTCACTAGTGAGGATGTGCTATTGGGGAAGAAAAACAAGGTGGCTTCTCTCAA  
AAGCCCTTGAATGTCACCAATTTGGACATGACCATGACATTGGAAAATGCCGATGTTGA  
CAAGTATGCCGCTGAAGAGTTGAAATCAGACATCAAAGCCTATGAGATGGTGTGTTGATT  
TGTATGTGGGTGGACACATTTGGTTTTTCAGGTTGGGAAATTGCAGATGAATAATGTACCC  
TTTCTAGCATCTTGAATCAAATCAAGAGGGAGGATGTGGATTTTGAAGAAAGCCTG  
AATGTGAAGTTAAGCTGTTTGCTGCCAGGCCTTCAACAAACTGA

>GmLEA2-62

ATGATGGCTGCAGAACATCAAAGAATTCATCCTGTTTCATGATGTGGAGGCACAACACA  
GACCATTGGTGCCTCAAACATTTGCAAATCTGATGATAAGGGTATTCTCATCGCACT  
TTTCTGTGATGCATTCAAAGCCACCTAAGAGAAGAAGAAGCTGTTGCTGCAGGTTCA  
TGTGTTGGACACTTAGCATATTAAGTATTTGATAATTGCTATTGCCATCACAATAGGGAT  
CCTATACCTTGTTTTTAGGCCAAAGCTCCCCAAATACTCAGTGGACCAACTGAGGATAA

GCCAGTTCAATGTTTCAGACAACAACACCCTCTATGCCACCTTCAATGTTGCAATCACT  
GCAAGAAACCCTAACAAGAAGATTGGAATATACTATGAGGGTGAAGCCACATAAGTG  
CTTGGTACATGGAAACACAATTGTGTGAAGGGTCTTTGCCAAAATCTACCAGGGTCA  
CAGGAACACCACAGTGCTTGATTTGCCTCTAACTGGTCAAGCACATGATGCAAATGGC  
TTGGTGAATAGAATTCAGGAGCAGCTGCAACAGACCAACAATGTTCTCTCAATCTTA  
AGGTGAATCAGCCTGTGAGGGTTAAGCTTGGTAAGTTGAAGCTCTTCAAAGTCAAGTT  
CAGGGTTAGGTGCAAGCTTGAAGGTGGATAATATTCTTGGGGCTAGTAATGATATTAGAA  
TTTCTAGAAGTAGTTGTAAGTTCAGGCTTAGGCTGTGA

>GmLEA2-63

ATGGGAGGAAGAATGCACACGAAATCAGACTCGGAGGTGACGAGCAACAGCATGGAG  
CAGTCGTCGCCGCGCGTCTCTCCCGCGCGGCCACTCTACTACGTCCAGAGTCCTT  
CAAACCACGACGTGGAGAAAATGTCCTACGGCTCAAGCCCCATGGGTTCCCCACACCA  
CCATTTCCACTACTACCTCTCTTCCCCCATCCATCACTCTCGCGAATCCTCCACCTCTCG  
CTTCTCCGCTTCCCTCAAAAACCCTCGCAACTTCTCTCCTCCTCCTCCTGGAAGAAGC  
TCCACCCTCACCCAAACCGCGACGTTGACCCCGACGACCATGACGACGCCGACCACC  
ACCTCAAGCAGTCCTCCCGCAACCTCCGCTTGTACTTGTGGTTCTTCTCCTCTTTCTT  
CTCCTTTTGACCCTCTTCTCTTTCATCCTCTGGGCCCGCCAGCAAGACCTACAAGCCTCG  
AATCATTGTCAAGGTAACCTTGTCCAAATGGTATTGTTATTTACTGTAGTCTTTGTGATT  
GATATTTGGTTTTTGTATGGGGGTGGACAGAGTATAGTGTGGAGAACTTGTATGTTCA  
GTCAGGAAACGATGGAACCTGGGGTACCAACTGATATGTTGTCGTTGAACTCAACGGTC  
AGAATATTGTACAGAAATCCTGCCACTTTCTTCGGCGTTCATGTCACTTCTACCCCTCTT  
CTCATTAGCTATTACCAGCTTGCAATTGCCTCTGGCCAGATGCAGAAGTTCTATCAATCG  
AGGAAGAGTCGGCGGAGTTGGCTGTAGTGGTTTCAGGACACCAGATTCCTCTCTATG  
GTGGCGTGTCAGTTTTAGGGAATACTAAAGAGCATTGGAGAGTGTGCAATTGCCACT  
GAACCTGACATTTGTAGTGAGATCAAGGGCCTTCATCTTGGGAAGATTAGTTAAGTCTA  
AATCTTTTCGAAGAATCAGATGTTCTGTCACTTTGCATGGCAACAACTTGGAAAACAT  
CTTAATTTAACGGATTCCTGTGTCTACAAGTGA

>GmLEA2-64

ATGTCCGTCAAAGAGTGCGGCCACCACTCATCCCAACGCCGCAACCTCCTCCGCCTCA  
TCCTCGGCGCCATCGCGGCCTTCGTCGTCTCATCCTCCTCGTCATCTTCTCATCTGGG  
TCATCCTCCGCCCCACAAAGCCCCACTTCACCCTCCAAGACGCCACCCTCTACGCCTTC  
AACCTCTCACCCCCACACCAACACCCTCACCTCACCATGCAGGTCACCCTCTCCT  
CCCACAACCCCAACGCGCGCATCGGCGTCTACTACCACGCGCTCCGCGTCTACGCCTC  
CTACCGGAGCCAGCAGATCTCCCTCGCCACC GCGCTCCCCGACACCTACCAGGGCCAC  
CGCGACTTCGCGGTCTGGTCGCCGTTTCTCTTCGGCAATGTCGTCCCCGTCTCGCCGTT  
TGTGCTGACCTCGCTGCAGCAGGACCAGAGCGCCGCCGCGCGTAGTGGTCAACGT  
TAAGGTCAACGGGAGGGTCAAGTGAAGGTCGGGTCTTGGGTCTCTGGGAGGTACCA  
TATCTACGTGAACTGTCCCGGTATATTAGCTTCGCCGGAGATCGGAGCAATGTCGCCG  
GAGTCGTGGCTTCTCCGGTGAAGTTTCGCCTCTTGCAGAGTTGCAGTGTGATGTGTA  
G

>GmLEA2-65

ATGAGCACCAAGGAGTGCTGCCACCACGACGAGGAGCGGCGTCAGCTCCCCCGCCGC  
GTATTCGCCGCGATCCTCGGCTTCATCCTCCTCATCCTCCTGGTGATCTTCTCATCTGG  
ATCATCCTCCGCCCCACCAAACCCCGCTTCATCCTCCAAGACGCCACCCTCTACGCCTT

CAACCTCTCCTCCACCGGCGACACCCCTTCCCCCATTACCCCAACCCCAACACCCTC  
ACCCTACCATGCAGGTCACCCTCGCCGCCTTCAACCCCAACCACCGCATCGGAGTTT  
ACTACACCAAACCTCGACGCCTACGCCGCCTACCGCGGCCAGCAGGTCTCCGTCGCCAC  
CTCCCTCCCCGCCACCTACCAGGGCCACCGCGACACCTCCGTCTGGTCCCCCTACCTCT  
ACGCCACCGCCGTCCCCGTCTCCCCCTTACGCTCCAGATCCTCCAGCAGGACAAAAC  
CTCCGGAGGAATTCTGGTCAACGTAAAAGTCAACGGAAGAGTCAAGTGGAAGGTCCG  
AACTTGGGTTTTCCGGAATTTACCATATTAATGTCAACTGTCCGGCGTACCTCAGGCTCG  
CCGGCGACCGGGACGACGCCATCGGATTTGCCGGTCCGGCCGTGAAGTTTCAGCTCTT  
CCAAACATGCATTGTTGATGTCTAG

>GmLEA2-66

ATGGCTAATAGAGGCCTCAAATTTGCTTGGCTGTGTCTCTACTCTTCTTGGTCATCGTT  
ACAATTATGATTGTGACTTTATTTATGACCATCTTTAAGCCCAAAAATCCTGAAATCACT  
GTCCACCCGTGTTGGTCTAGAAGACTTTCAATTTCCCTTTCACCCAATTTGACCATAAAT  
GTGACTCTAGGCATGATAATTACTATAAGGAATCCAAACTATGGAAGCTTCGAGTACAA  
AAACTCCACTGGTTATGTGAATTTTCATGATACCGTGGTAGCCGAAGTTCCAATAGAAG  
CAGAGTTAGTTCCAGCACGTGGCCAGATTAATGTGAACACTTCAGCAGATTTTATGGTA  
GAAAAGTTAATCAATGATCCTAATTTTTTGTGATGTTCTAGGTGGAACCTTGAATTTT  
ACATCAACAACTGCACTTCCTGGGAAAGCCCGTATGTTCAACATTATCAAATTGAAGGC  
CACGTCTTATAGCTCATGTGACATCTCTGTTAATATAAGCTCTAGGAAAGTTGATACCAA  
TTGCAATTACAAAATCAAGCTTTAA

>GmLEA2-67

ATGACATCTGAAGCTTATGTACCTAAAAGATATGAGTCGCTAGAGAACCCTTTTGCTCAT  
AAACCGCGTAAGCGTTCCACCAAGGCTCTGGTTTATGCGGGTGCCTTAGAAAGGAAA  
ATAAGGTACTCTGATGTTGTCATTGTGCGTGAAGCGGATAATCAGAATGAAGACATT  
GGATTGGACTATTTAGATAATGAAGTTGGGATAATGTACTTAGGATCTCAACTTAGCTCG  
GGGCAGATCCCTCCTTTCTTGCAGCCAGGGAAGAACACAACAAAGGTGAATGTGGAA  
TTGAAAGGGGAAAATGAATTTGGTGAAGAAAGGGAAAATTCCTTTGTTGATAACAGTGA  
AGCTTCCCATAAGGCTTGTGATTAAGATTTGATTCATCTCAGGAAAGTTGTGGTTAAT  
GTAAATTGTTCCGTAGTTATTGACAAGTTGGAAGCCAACAAAAGTCCTAAGATTTTGA  
CAAAGTTTTACCTATGGCATAGATTTCTGA

>GmLEA2-68

ATGCGACCAACACCCACCCCTGATAACCTCAATTGCATTCCCAGAATAAAGGTAGGATC  
TGGTAAAGGGAGAAAAGTGTGCCTGACGGTGACAGGTGTTGTGATTGCAATTGTATTG  
CTAATTGTGATACTAGCGTTGACAGTGTTCAAAGCCAAGCATCCTGTTACCATAGTGGA  
CTCAACGAAGCTAGAGGACTTTCACGTGAGCTTGGATCCAGTAAAATAAGGGTAGAT  
TTGAATGTGACCTTGGGAGTGGATGTCTCAGTGAAGAACCCGAACAAGGTGGGATTCC  
AGTATTCAGACAGCGCTGCCACCTCAATTACAGAGGGCAGCTGATAGGTGAAGTCCC  
GATCTCTGCCGGAGAGATTTTCATCCGGTGAGACCAAGGATTCAATCTCACCCACACC  
ATTATGGCCGACCGTTTGCTCTCCAATTCTCAGCTTTTATCTGATGTCACATCTGGTACA  
TTGCCCTAAGCACTTTCGTGAGGATGTCTGGGAAAGTCAGCATCTTAGGCTTTATCAA  
AGTCCATGTGGTTTCCCTCCACTTCTTGTGATGTTGCAATTAATCTTTCTAATGGAAGTGT  
TGGGAACCAAGAGTGCCAATACAAGACAAAACCTTTGA

>GmLEA2-69

ATGGCTCATCCTCCCACACAATCGCAGTCTAGAGCAGCCAATAAGCCAAAACGCTCAA

ACCTTCTTCGTTGCATTGCCATTTTCATACTAGCCTTGATCATCCTTGTGGGCATTGCTG  
TGATCATAATTTGGCTAGTTTTGAAGCCCAAAGGTTGGAATACACTGTGGAGAATGCT  
GCAATCCACAACCTCAACTTAACCGATGCAAATCACCTCTATGCCAACTTTGACTTCAC  
CATAAGATCTACAATCCCAACTCTAGAGTCTCCATATACTATGACACTGTGGAGGTGTC  
AGTGCGTTATGAGGACCAAACCTCTAGCAACCAATGCGGTTTCAGCCATTTTTCCAGTCA  
CATAAGAATGTGACCAGGCTTCATGTGGGCCTCACGGCCCAAACCGTGGCCCTGTATG  
ATTCTGTGCCTAAGGACCTTAGGCTCGAGAGATCCTCTGGGGATATTGAGTTGGATGTG  
TGGATGAGGGCAAGGATAAGGTTCAAGGTTGGAGTGTGGAAGTCAAAGCATCGTGT  
TGAAGATTTTTTGTCTCCTGTCTTGGTGCATTTTTCTAAAGGAAAGAGTTTCGAAAGG  
GCCCCTTGTGATGTAGAACTCTAA

>GmLEA2-70

ATGACATCTGAAGCATATGTGCCTAAAAGATATGAGTCTCTAGAGAACCCTTTTGTGCAT  
AAACCGCCGCGTAAGCGTTCTCGTCGTGGTTCTGGTTTTTGCGGGTGCCTGAGGTGTT  
GTTGCTGCTGCTTTAGTTTTCTGCCGTTGCTGCATTTGCACCATTTTTATCATAATTATACT  
CTTGGTGGGAATTGGTTTTGGCTTTATTTTACTTTATTAAGCCTAAGGTTCCCTCCTATGA  
CATTGAACACATTAATGTCAAGTCATTTGATATCAGAAAGGAAAGTAAGGTATACTG  
ATGTTGTCATTGTCGTGAAAGCGGATAATCCTAATGAAGAAATCGGATTGGACTATTTG  
GAGAATGAAGTTGGGATAATGTACGTAGGATCTCAACTTAGCTCGGGGCAGATCCCTCC  
TTTCTTGCAGCCAGGGAAAAACACAACAACGGTCACCGTGGAAATTGAAGGGGGAAAA  
TGAATTTAGTGTGAAATGCAAATCACTTTATGGAAGACCAGGAAAAAGGGAAATATT  
CCTTTGTTGATAACAGTGAAGCTTCCCATAAGGATCGTGATTAATGATTTGATTCATCTC  
AGAAAAGTTGTGGTTAATTTAAATTGTTCCGTGGTTATTGACAAGTTGGAAGTCAACAA  
AAGTCTAAGATTTTTGGACAAAGTTTTTCAGCTATGGCATAGAGTTCTGA

>GmLEA2-71

ATGGCTAATAAAGGCCTCAAATTTTTGTTTGATCGTGTCTCTACTCTTCTTGATCATTGTT  
ACCATTGTGATTGTGACCTTGTTTTTACCGTCTTTAAACCCAAGGATCCTAACATCACT  
GTCCACCCTATTGGCCTCGAACACTTTGACTTTTCCCTTTTACCCAATATCACCGCGAAT  
GTGAGTTTtaggcATGGTgATCACTATAGAGAATCCAAATTATGGAAGCTTCGAGTTCAC  
AAACTCGATTGGTTACATCAATTTTCATGATACTGTTGTAGGCGAAGTTCCAATTGGGG  
CAGAGTTGGTTCAGCGCATGGCCAGATTAATGTGAACACTTGGGCAAATTTTATGGTA  
GCGAAGTTAATCAGTGTTCCAAATTTTGGTCAGATGTTCTAAGTGGAACTTTGAATTT  
CACATCAACATCTTCACTGCCTGGGATAGCTCGCATGTTCAAGATTTTCAAATTGAAGG  
CCACGGCCTATAGCTCATGTAACATCTCTCTTAGAATAGTCCCTAGGAATGTTGATACCA  
AATGCATATCCAAAATCAAGCTTTGA

>GmLEA2-72

ATGGCTTCTAGAGGCCTAAAATTTGCTTGGCTGTGTCTCTACTCTTGTGATCATT  
ACAATTGCAATTGTGACCTTATTTATGACCATCTTTAAGCCCAAATCCTGAAATCACT  
GTCCACCCTGTTGGTCTAGAAGACTTTCAATCTTCTTTTACCCAATTTGACCCTAAAT  
GTGACTCTAGGCATGATAATTACTATAAGAAATCCAAACTATGGAAGCTTCCAGTACATA  
AACTCCACTAGTTAIGTGAAATTTTCATGATACCGTGGTAGCTGAAGTTCCAATTGAAGC  
AGAGTTAGTCCCAGCACGTAGCCAAATTAATGTGAACACTTCAGCAGATTTTATGGTAG  
CAAAGTTAATCAATGATCCTAATTTTTTGTGAGATGTTCTAGGTGGAACTTTGAATTTCA  
CATCAACAATTGCACTTCCCTGGGAAAGCCCGTATGCTCAATATTATCAAATTGAAGGCC  
ACGTCTATAGCACATGTGACATCTCTGTTAATATAAGTTCTAGGAATGTTGATACCAAT

TGCAAGTCCAAAATCAAGCTTTAA

>GmLEA2-73

ATGATAAATCCCACCAAAGCTATGCCCGTTTCACACTCTTTCCTTTCTCTGGCTGATTCC  
ACAGACACACACCGCTTTACTATTATGCAAGACCCTTCTCGCCCCGCCCTCCTCCCTT  
CTACCACCAAACGGCGGCCAGCCTCCTCCCCCGCCGCTCCGCCGCCATCGCCACC  
GGTACCCCTACGCTGCCAACAACAATACTACAACACCCTTACCCCTCCTCCTCGCTC  
CTACGCCTCCCGCTCCTTCTTCCGCGCTTTCTTTCGCCACCATGATCTGCCTCGCCGTCGT  
CTTCGGCGTCGTCCTCATCATCACCTGGCTCGTCCTCCGCCCTCCCTCCCCACTTCA  
CCCTCCACTCCCTCTCCGTTTCCAACCTCTCCAGCACCTCCCAATCCCTCTCCGCCACG  
TGGCACCTCTCCTTCCCTCGTCCGCAACGGCAACAAGAAGATGACCGTCTCCTACAACG  
CCCTCCGCTCTTCCATCTTCTACCGCCAAAATACTCATCTCCGAGTCTCAGTCTCGTCCC  
TTCAGGCAGGACACCAGGTCCCAGACCACACTCAATGCCACCCTCACCGCCGCCGGC  
ACCTACCTCGAGCCCAAACCTGATCGACAATCTCAACGCCGAGAGGAACGCCAGCTCG  
GTCCTCTTCGACGTTACGGTCGTCGCCACCTCTTTCGGCTCCGGCTCGTGGAGGTT  
CAGGACGAGGGTTCTCAAGGTTCTGTGCCGAAAGTACCCGTCGGCGTCTCGTCCAAG  
TCCAGCTCCGGTGATTTGGTCGGCGGAGATCGGGAATGTCAGGTGTGGACGTGA

>GmLEA2-74

ATGAGCACCAAGGACTGCGGCAACCACGACGAGAAGAACCCTCAGTTCCTCCGCTGC  
CTATTCGCGGCGATCCTCGGCTCCATCCTCCTCCTCATCTTCTCATCTGGATCATCCTC  
CGCCCCACCAAACCCCTCTTTCATCCTCCAAGACGCCACCGTCTACGCCTTCAACCTCTC  
CTCCTCCGGCCCCACCCCTTCCCCCATCAATCCAACCCCAACACCCTCACCTCACCT  
TGCAAGTACCCTCGCTTCTTCAACCCCAACCACCGCATCGGAGTCATCTACACCAA  
ACTTGACACCTACTCCGCCTACCGCGGCCAGCAGTCTCCATCGCCACCTCCCTCCCCG  
CCACCTACCAGGGCCACCGAGAAACCGCCGTCTGGTCCCCCTACCTCTACGCCTCCGC  
CGTCCCCGTCTCCTCTTTCACTCTCCAGATCCTCCAGCAGGACAGAACCTCCGGAGGA  
ATTCTGGTTAACGTCAAAGTCAGCGGAAGAGTGAAGTGAAGGTTGGAACCTTGGGTT  
TCCGGAAATTACCATATTAATGTCAACTGTCCGGCATACTCAGGGTCGCCAGCGATCG  
GGACGACGCCGTTGGATTTCGCCGGTCCCGCCATCAAGTTTCAGCTTTCACAAAGTTGC  
ATTGTTGATGTCTAG

>GmLEA2-75

ATGACAGACAGGGTGTACCCATCGGCCAAGCCCGCCGCGGTTAACGGCGCCGCCGCC  
AACCCATCTTTCCCGGCGACTAAGGCTCAACTTTACGGCGCCACACGCCCCACCTACC  
GCCCTCAGCCCCACCACCGGCGCCGGAGCAAGCGCCGGTGTCTGCTGCACCTTCTTCTT  
CTGGCTGATCCTCACCGTTCTGATCCTCCTCCTCCTGATCGGCGTCGGCGGCACGGTGT  
TCTACCTCCTCTACCGCCCCACCACCCACCTTACCGTGACGTGCTGAAACTCTCT  
TACCTGAACCTCACCTCCTCCTCCAACACCCTTAACTCCCGCTTCGACATCACCGTCTC  
CGCCACGAACCCCAACAAGAAGATCCTTTCGCCTACGACCCACCTCCATCACCATC  
CTCTCCGCCGACATCGACCTCGGCGACGGCACCGTCCCCGGCTTCCAGCACCCGAAGA  
AGAACACCACGCTGATCAAAGGCTCCATCCTCAGCTCCGGCCAGGCGTCCAAAGCG  
ACGAAGCCTCACGCTTGAAGTCCAGCATGAAGAGCAAGAACGGGTTGCCACTCAAAG  
TGAATTTGGAACCAAAGTGAAGGCCAAGATGGGAAATTTGAAAACCCCAAAAGTCG  
GAATCAGAGTCTCCTGCGACGGAATCAGAGTCAGTCTTCCCTCCGGTAAGAAACCGGC  
GACGGCGTCCACTTCTAACGCCAAATGTGACGTCGATGTTTCGGTTCAAGATCTGGAAG  
TGGACCGTTTGA

>GmLEA2-76

ATGACGTTGTCAGCAAAATCTGAATCGGATATCACAAGCTTAGCTCCATCTTCACCTTC  
AAGATCACCAAGCGGCCTGTGTACTATGTGCAGAGTCCTTCAAGGGATTCTCATGATG  
GGGACAAGTCATCTTCAATGCAGGCAACTCCAATATCAAACAGTCCTATGGAGTCTCCC  
TCACACCCTTCATTTCGGGCGTCACTCAAGGAACTCTTCCGCGAGCCGCTTTTCGGGGA  
TTTTTCAGGTCATCTTCGGGAAGGAAAGGGAGTAGGAAGAGGAATGATAAGGGGTGGC  
CTGAGTGTGATGTGATTCTGGAAGAAGGGTCTTATCATGAGTTTCAGGACAAGGGTTT  
CATGAAGGCGCTTCCAGGCCTTGATTACCTTTGTGGTTGTCTTCGCTGTGTTTTGTTTGA  
TCATTTGGGGCCTTACAAGGCACAAATTGCTGTAAAGAGTTTGACGGTGCATAATTTCT  
ATGTTGGAGAGGGTTCAGACTTCACGAGTGTCCCCACAAAATGCTGACAGTTAATGG  
CACTTTACGCATGAGCATCTACAACCCTGCTACATTGTTTGGGATCCATGTGCACTCCA  
CACCCATCAATCTTGTTTTCTCAGACATCACTGTTGCTACTGGCGAGCTGAAGAAACAC  
TATCAGCCAAGAAAAGTCACCGCATTATATCAGTGAACCTAGAGGGTACTAAGGTTC  
CTTATATGGGGCTGGATCCACCATAACTGTATCCCAAAGTGGCGTTGAAGTTGGACTCA  
CATTGAACTTTGAAATCCGTTTCGCATGGAAATGTGGTGGGTAAACTGGTCAAGACAAG  
GCATCGTAAAGGAAATCACTTGCCCTTGGTCCTCAACTCTTCTCGATCAAAGCCCTATC  
AAATTCAAAGGAATTCATGCACCTATGA

>GmLEA2-77

ATGCGATTCTCAAAGCTTCCTTCTACACTCTTCTTCTCCGCAAACCTCATAACCATCAC  
CATCAAAGTACGTCGTTTTATCGCGGCGTCGCGTAGTGACCTTGGCAGTGGGTGTGTT  
GATCTTGCTGAGTGTCTCTACATTTTCTGGCCATCGGGTCTGATCTGAAGATCGTGG  
GGCTGAAACTGAGGCGCATAAAGGTGCACCCTGTGCCGCAATCACCATAGACATCTC  
CATGCTTCTCACGCTGAGGGTGCACAACGTTGACGTCTACTTCATGGACTTCGGAGCG  
GTTAACGTCGCCGTCGCCTACAGGGGGAAGATGCTGGGCCACGTGACGTCCAGGCGC  
ATGCACGTGAGGGCCAGGGGTCTTCTTACGTGGATGCTGACGTGGAATTTGCTGGCA  
TCAGCGTGCTACCGGAGCTTGTGTTGCTGCTGGAGGACGTGGCCAGAGGTATCGTACC  
CTTTGATACCATTAGCCATGCTAAGGGCCAATTGGGCCTTCTTCTTCTTCACTTCCCAT  
CAAGGCAAAGTATCGTGTGAGGTTGTGGTCAAGTATAATAAACCAGACCATTGTTTCGTC  
AACATTGTCTCCACGAGTGA

>GmLEA2-78

ATGCTAGCCTCTGTGGAAGAAGAAGTGGCACACCAAAAACAACCAAGGAATCAACATT  
CTCAGCAATCAGAAGCACCAAATTCCTTGCCAACACTAGAGCAATTTTCGGGCAACC  
TCGACTTCAAAGGACAAAACCAATTATATGGTGTGCTGCAATACTGTGCTTCATATTCA  
GCCTAGTGCTTATCTTCTTTGGAATTGCAACACTGATTCTCTACCTTTCCATGAAACCAC  
GAAACCCACGTTTGACATTCCCAATGCAAGCCTCAATGTGGTGTACTTTGACTCACCA  
CAGTACCTCAATGGTGAATTCCTCTCCTTGCAAATTTTCCAATCCTAACAGGAGAAT  
TGGGCTGAGGTTTGAGTCTTGAACATTGAGCTTTTCTACTCAGACAGACTCGTGTCTT  
CACAAACAATCAAGCCTTCACTCAAAGGCCAAGGGAAACCAGGCTGCAATCAGTGA  
ACTTGATATCAAGCTTGGTGTTTTTACCGCAAGATGTTGGTGTAAAACCTCAAAGGCAA  
GTGGAGAATAACAGGGTCAATTACAATGCAAGGGGAACATTTAAGGTGAGGTTCAATA  
TTGGCCTTGTCCATTTATCTTACTCTCTGTATAGCACATGCCAGATAGAGATGACTAGTC  
CTCCAGCTGGTATTCTAGTAGCAAGACAATGCATAACAAACCGATGA

>GmLEA2-79

ATGTCGACATCTGATAAGCCAGAAGTGGTGGAAAGGGGTAGCAAGGATGAAAAACAC



AAGGAAGATGATCAAGAGGAGGGGAAGGGTGGATTTCATTGAGAAGGTGAAGGATTC  
ATTCATGACATTGGTGAGAAGATTGAGGAAGCTATTGGGTTTGGGAAGCCAAGTCTGCTG  
ACGTTACTGCGATTACATTCCATCGATTAATCTTACAAAGGCAGATCTTGTGTGTTGATG  
TGCTCATCAAGAACCCGAATCCGGTGCCAATCCCTCTGATTGACATAGATTACTTGGTT  
GACAGTGATGAAAGGAAGCTAGTTTCTGGATTGATACCAGATGCGGGTACCATCGGTG  
CACATGGAGAGCAGACTGTCAAATTCCTGTCACTTTGATTTATGATGACATCAAGCAA  
ACATATGCTGATATTAACCTGGAAGCATCATTCTTATAGGGTGAAGGTTAGTCTCATT  
TTTGATGTTCCCATCTTGGGAAGGCTAACTCTACCTTTGGAGAAAAGTGGAGAAAATCCC  
CATACCATAACAAGCTGATATTGATCTTGAGAAGATTCATTTTGAAAGGTTCTCTTTTGA  
AGAGACAATTGCAACGCTTCATTTGAAGTTGGAAAACAAGAATGATTTGACCTTGGC  
CTCAATGCGCTCGATTATGAGGTCTGGCTTGGTGATGTTAGCATTGGTGGTGCAGA  
ACTCACCAAGTCTGCTAAAATTGAGAAAAGTGGAAATTAGTTATATTGATATTCCAATTACCTT  
CAGGCCCAAGGATTTTGGCTCTGCACTCTGGGACATGATTAGAGGAAGGGGAACAGGT  
TACACCATGAAAGGACATATTGATGTTGACTCTCCCTTTGGAGCAATGAAGTTGCCCAT  
CAGCAAAGAAGGTGGTACTACCCGTCTTAAGAAAAAGAAGGAAGATCGTGATTATGAT  
GACGATGACGATGATGAGGATTGA

>GmLEA2-80

ATGGCTGACCGAGTTCACCCCAGCCACTCGCCTTCCGTTTCCGCGGATTACAAACCGC  
CATCGCCTCAAGACTCCTCCGTCTGTTCCGAAACCGCCGTCGCCACCGTCACCGGAGAA  
GCCAGTGCCCTCCGCCTGGAACCTACGTCATCAAGATCCCCAAGGACCAAGTCTACCGC  
GTCCCTCCGCCGAGAACGCTCGCCGCTACGACCAATACGCTCGCCGTAAACACCGCC  
GGAGCCGATGCTGCTGCTGCTTCTGCTGGCTCATCGGAATCCTCTTCATTCTCGTCGTG  
CTCCTCGCCATCGCCGCCGGCGTCTCTACCTCGTTTTCCGTCCCGAGGCGCCGAAATA  
CTCCATCGAAAACATCACCGTCAGAGGAATTAACCTCACCTCGCCGTCGTCCGTGGCG  
GCGATCTCGCCGAGTTCAACGTCACCGTCAAGGCCGATAACCCTAACGACAAGATCG  
GGATCCGTTACTTGAAGGATAGCTCCGCCGAGGTGTTTTATAAGGACGCGAGGCTGTGT  
AACGGCGCTCTGCCGGCGTTTTACCAGCCGTCAAACAACGTGACGGTGTGGGACG  
GCGTTAAGGGGTGACGGAATCGAGCTGAGAAGCGAGGACCGAAGAGCGTTGCTGGA  
GGCGCAGACCAAACGGAGAGTGCCGTTGACCGTTAGGATTAGGGCACCGGTGAAAAT  
AAAAGTGGGGTCCATTAGGACGTGGAAGATTACCGTTAAGGTGAACTGTGATGTGACG  
GTGAATGAGTTAACGGCGCAGGCCAAGATTGTTTCTAAACGTTGTAGTTATGACGTGGA  
TCTTTGGTGA

>GmLEA2-81

ATGGTAGCATTATGTGTAGCGATTGCACTTGTATTGTTAAGGGTGATCTTAGCATTGACA  
GTGTTCAAACCAAGGCACCCCATTACCAATGTGGATTCAATAAGGCTTCAGAACATGA  
GCTTGGGCATGGACATGTTTAGCATGAGTGTAATGTGAACTTCACATTGGAAGTGGAT  
GTTTTAGTCAACAACCCTAATAAGCTTGGATTCAATACTACAATAGCTCTGCCAACTC  
AATTATAGAACAATTGATTGGGGAAGCTCCTATCCCCAATGGAGACATATTAGTTGA  
GGAGATTAAGGGACTTAACTTGACTCACTGTTATGGCTGATCGTTTGGTCTCCAATT  
CTAAGGTCACCAAGGATGTTGCATTGGGTTTCATTGCCCTCAACACCTTAGTGAGAATT  
TTTTGCCAAGTCAACGTCTTAGGGTTTATGAAATTCTATGTGGCTTCCACCTCATACCAA  
AAATTCCCATTCTCGAGTTCGAGAATTTGTACAAAGGAGCAGAGTTGTCCCATT  
ACTTCAATATAGCAAAAAGAATCACAATAAG

>GmLEA2-82

ATGGCAGACCCTCAGAAAATTCACCCTGTGCACCATGATGTTGAGGCACAAAACCACC  
CTTCAGCACCATTGGTGCCAAGGAGCATGTCAAATCTGATGCTGGTGATCCACAAAG  
AGTAGTAGTAGTACAACAACAACAACAGCAGCAGCAACACATTCCTGTGAAGCA  
CACCAAGCCACCAACAAGAAAAGAAGAAGCTGCTGCTGCAGGTTCTTCTGTTGGCT  
AATTAGCATATTGCTGATTCTGATTGTGGCAATTGGCATCACTATTGGAATACTATACCTT  
GTCTTCAGACCAAAGCTTCCAAAGTACTCAGTGGATGAACTTAAAGTCACAACTTTG  
ATCTTGCAGACAACAACAGTTTATCAGTGACATTCAACTTGACAATCACTGCCAGAAA  
CCCCAACAAGAAGATTGGAATAGACTATAGGGGTGGCAGCCACATAAGTGCTTGGTAC  
ATGGACACAAAATTATGTGAAGGGTCTTTGCCAAAATTCTATCAAGGTCACCGCAACA  
CAACGATTCTTAGTATCCCTCTTACGGGGAAAACGCAGGATGCTACCGGCTTGCAAAT  
ACCCTTCAGAATCAGCTGCAAGAGACTGGGAATGTGCCTCTTAATTTGAGGGTGAAGC  
AGCCTGTGAGGATCAAGCTTGGGAAGTTGAAGCTGTTCAAATCAAGTTCAGGGTTAG  
GTGCAGGATTGTGGTGGATAGCCTTAGTGCTAATAGTTCTATTAGAATTCAGAGTAGTA  
GTTGTAAATTCAGGTTTAGGCTGTGA

>GmLEA2-83

ATGATGTTGTCAGCAAAATCTGAATCGGATATCACAAGCTTAGCTCCATCTTCACCTTC  
AAGGTCACCAAAGCGCCCTGTGTACTATGTGCAAAGTCCTTCAAGGGATTCTCATGAT  
GGGGACAAGTCATCTTCAATGCAGGCAACTCCAATATCAAACAGTCCTATGGAGTCTC  
CCTCACATCCTTCGTTTGGGCGTCACTCGAGGAACTCTTCTGCGAGCCGCTTTTCGGG  
GATTTTCCGGTCATCTTCTGGAAGGAAAGGGAGTAGGAAGAGGAATGATAAGGGGTG  
GCCTGAGTGTGATGTAATTTCTGGAAGAAGGGTCTTATCATGAGTTTCAGGACAAGGGT  
TTCACAAGGCGCTTCCAGGCTTTGATTGCTGTCCTTACCTTTGTGGTTGTCTTCACCGT  
GTTTTGCTTGATCATTGTTGGGGTGCTAGCAGGCCTTACAAGGCAGAAATTGCTGTAAAGA  
GTTTGACGGTGCATAATTTCTATGTTGGAGAGGGTTTACAGACTTACGGGTGTCTCACA  
AAAATGCTGACAGTTAATGGCACTTTACGCATGAGCATCTACAACCCTGCTACATTTTT  
TGGCATCCATGTGCACTCCACCCATCAATCTAGTTTTCTCAGAAATCACTGTTGCTA  
CTGGCGAGCTGAAGAAACACTATCAGCCAAGAAAAAGTCACCGCATTGTATCAGTGA  
ACCTAGAGGGTACTAAGGTTCCCTTATATGGGGCTGGATCCACCATAACTGTATCCCAA  
ACTGGTGTGAAAGTTCCACTCACATTGAACTTTGAAATCCGTTTCGCGTGGAATGTAGT  
GGGTAAACTGGTCAAGACAAGGCATCGTAAGGAAATCACTTGCCCTTGGTCTCAAC  
TCTTCTCGATCAAAGCCTATCAAATTCAAAAGAATTCATGCACCTATGATTGA

>GmLEA2-84

ATGACAGACAGGGTGTACCCATCCGCCAAGCCCGCCGTGGTTAACGGCGGGCGCCGCC  
AACCCATCTTTCCCGGCGACGAAGGCTCAACTTTACGGCGCCACCCGCCCCACCTACC  
GCCCTCAACCCACCACCGGCGCCGGAGCCGGCGACGGTGCTGCTGCACCTTCTTCTT  
CTGGCTGATCCTCACCGTGCTGATCCTCCTCCTCCTGATCGGCGTCGCCGGCACGGTGT  
TCTACCTCCTTACCGCCCGCACCACCCACCTTACCGTACGTCGCTGAAACTCTCC  
TACCTGAACCTCACCTCCTCCTCCAACACCCTGAACTCCCGCTTTGACATCACCGTCTC  
CGCCACGAACCCCAACAAGAAGATCCTCTTCGCTACGACCCACCTCCATCACCATC  
CTCTCCGGCGACATCGACGTCCGGCGACGGAACCGTCCCGGCTTCCAGCACCCGAAG  
AAGAACCACGCTCATCAAAGCCTCATCCTCAGCTCCGGCCACGCGCTCCAAAGCG  
ACGAAGCTTACGTTTGAAGTCCAGCATGAAGAGCAAGAACGGGTTGCCACTCAAAG  
TGAATTTGGAACCAAAGTGAAGGCCAAGATGGGAAATTTGAAAACCCCAAAGTGG  
GAATCAGAGTCTCCTGCGACGGAATCAGAGTCACTCTTCCCTCCGGCAAGAAACCGGC

AACGGCGTCCACTTCCAACGCTAAGTGCGACGTCGATGTTTCGGTTCAAGATCTGGAAG  
TGGACCATTGA

>GmLEA2-85

ATGACCACCCCAAGAGGAAACCACCACCCGCAGCCTAACGGTGAGCGAAGAAGACAA  
TGGCCACCGGCACATCCAGCAGCGGCAGCGGCAGCGGCTCCGGAAGCGGCAGAGAC  
AGCGACAGCAACAGCAGCAGGCGGACATTCTTACAATGGGTACCGACAGTACCACCC  
AAGAACGCCGGGTCGTTTCGTCGTCGTCGTCGGCATCGTTCAAAGGGTGTGTTGCTGC  
CTCTTCCTTCTATTCTCGTTCCCTGGCGCTGCTGGTGCTAGCGGTGGTGTGTAATAATC  
CTAGCGGTGAAGCCGAAGAAGCCACAGTTCGATCTGGAGCAAGTGGGGGTGCAGTAC  
ATGGGCATCACACCCAATCCCCCTCCACCGCTTCCCTCTCCCTACTATTCGCCTCCTC  
TTCGCCGCCACCAACCCCAACAAGGTCGGGATCAGGTACGGCCAGTCCAGCTTCACCG  
TCATGTACCGCGGCATCCCATTTGGGAAAAGCCACCGTCCCCGGCTTCTTCCAACAGCC  
TCACAGCACCCGACAGGTATCGCCACCATCGCCGTCGATCGCGTCAATTTGCTTCAG  
GCCGACGCCGCCGATTTGATCCGAGACGCCTCCCTCAGCGACCGAGTCGACCTCAGAG  
TCTTGGGCGACGTTGCTGCCAAGATCCGCGTCATCAACTTCGATTCTCCAGGTGTTTCCAG  
GTCTCGGTGGATTGTGCTATTGTGATCAGTCCAAGAAAGCAATCTCTGACTTACAAGCA  
GTGTGGGTTTCGATGGATTGACTGTTTGA

>GmLEA2-86

ATGGCTCATCCTCCCTACAATCGAACTCTACAGCAGCCAATAAGCCAAAACGTTCCA  
ACCTTCTCCATTACATTGCCATGTTTATAGTAGCCTTGATCATCCTTGTAGGCATAGCTGT  
GATAATAATTTGGCTAGTTTTGAAGCCAAAAGGTTGGAGTACAGTGTGGAGAATGCT  
GCAATCCACAACCTTCAACTTAACGGATGCAAATCACCTCTATGCCAACTTTGATTTAC  
CATAAGATCCTACAATCCCAACTCTAGAATCTCCATATACTATGACACTGTGGAGGTGTC  
AGTGCGTTATGAGGACCAAACTCTAGCCACCAATGCTGTTTCCAGCATTCTTCCAGTCAC  
ATAAGAATGTGACCAGGCTGCACGTGGCCCTCACGGCGCAATCCGTGGCCCTGTATGA  
GTCTGTGCCTAAGGACCTTAGGCTTGAGAGATCCTCTGGGGATATTGAGTTGGATGTGT  
GGGTGAGGGCAAGGATAAGGTTCAAGGTTGGTGCCTGGAAGTCAAGGCATCGTGT  
TGAGGATTTTTTGTCTCCTGTGTTGGTGCACCTTTTCTAAAGGAAAGAGTTTCGAAAGG  
GCACCTTGTGAAGTAGAACTCTAA

>GmLEA2-87

ATGCTAGAGACGGAGCAAGCAAGACCATTAGCCCCATCAATAGAGCGCCAAAGCAGC  
GATGAGGATAACACCACTCCACACCCTCAAACACAAGGCCACAAAAAACTCATCAAA  
CGTTGTGCTTGCCATTAATCTCTTTACTTCTCATAGCAATAGTGATCATAGTTTTAATCT  
TCACAGTATTTTCGTGTCAAGGACCCCGTGATCACAATGAACAGCATCAAGATCACAAA  
GCTCCAACCTGTCAACACCATGTCACAACAACCCGGGGCCAACATGTCCTTAGTCGCT  
GACGTGTCGGTGAAGAACCCTAACGTTGCATCCTTTAGGTATAGCAACACCACCACGA  
GTTTGTACTACCATGGTGTGATTGTGGGGGAGGCTAGAGGACCACCTGGGAGGGCCAA  
GGCCAGAAGAACATTGAGGATGAATGTCACAATTGATGTCATCACCGCTCGCGTCATTT  
CTAGCCCGGATTTTGTGACGGATTTAGGTTCCGGGTTGTTGACTATGAGCAGCTTCTCT  
AGAGTTCCTGGGCAGGTCAAGATCTTGAACCTTGATTAAGAGACATGTTGTTGTGAAAA  
TGAATTGCACCACCACTTTTAATATTTCCACACAGGCGATTAAGGAGCAAAGTTGTAAG  
CGGAAGGTTAAACTTTAG

>GmLEA2-88

ATGTCGCAGTTGCTGGATAAAGCCAAGAAGCTTCGTGTTCGGAGAAGGTAATGATATGG

CCAAGCCGGAGGCGAGTGTCACTGACGTGGACTTCAAGCGCGTGAGCAAAGATAATG  
TCGAGTACTTGGCCAAGGTCTCTGTTCGTAACCCTTATTCAACTTCCATACCCATTTGTG  
AGATCAACTACTCTTTCAAAGCGCATCCAGGGAGATAGCATCAGGGAAAATTCCAGA  
CCCAGGATCGTTGAAGGCAAAGGACACAACAATGGTGGATGTGCCAGTTAAGGTTCCA  
TACAGCATATTGATGAGCTTGGCAAAGGACATTGGTGCTGACTGGGACATAGACTATCA  
ATTGGATCTTGGTCTGGTTATTGATGTTCCCTGTCATTGGCATCTTCACCATTCCTCTCTCT  
CAGAAAGGAGAGATCAAGCTACCAACCCTCTCTACCATGTTTCGCCTAA

>GmLEA2-89

ATGAAGGTAGGATCTGGTAAAGGGAGAAAAGTGTGCCTGTCGCTGACAGGTGTTGTGA  
TTGCAATTGTATTGCTAATTGTAATACTAGCGTTGACAGTGTTCAAAGCCAAGCATCCTG  
TTACCACAGTGGACTCAACGAAGCTAGAGGACTTTCACATGGGCTTGGATACACCAAAA  
ACTAAGGGTCGATTTGAATGTGACCCTGCACGTGGATGTCTCAGTGAAGAACCCGAAC  
AAGGTGGGATTCAAGTATTCAGATAGCACCGCCACCTCAATTACAGAGGGCAGTTGA  
TAGGTGAAGTCCCGATCCCTGCCGGAGAGATTTTCATCCGGTGAGACCAAAGGATTCAA  
CCTCACCTCACCATTATGGCGGACCGTCTTCTCTCCAATTCCCAGCTTCTCTCTGATGT  
AGCGTCTGGTACATTGCCCTAAACACTTTTGTGATGATGTCAGGGAAAAGTCAGCATCT  
TAGGCTTTATCAAAGTCCATGTGGTTTCCCTCCACTTCTTGTAACGTTCCAATTAATCTTT  
CTAATGGAACAGTTGGCAACCAAGAGTGCCAATACAAGACAAAACCTTTGA

>GmLEA2-90

ATGAAGCCCAACGACAACATGGCAATGCTGGCCAAGACCGACTCCGAGGTTAGCAGC  
CTCACGCAGTCCCTCGCCGACGCGATCCCCGCGACGGGCAGTGTACTATGTGCAGAGCC  
CGTCGCGAGACTCATCGCACGACGGGGAGAAGACTACGAACTCGTTTCACTCGAGTC  
CGCTGCAGAGCCCATTGGGCTCCCCGCCCACTCCCACTCCAACCTCCTCTTGGGCCA  
TCACTCGCGGAGTCCGCCTCCACGCGTCTCTGGCTCGCGCAAGAGCAGCTCCTCG  
GGCAACAACCGCAAGGGCCCGTGGCGGCCCTGGAAGGACCAGTTCCATGCCATCGAG  
GAGGAGGGCCTCATCGATGCTCACGACAATGCCCGTGGCTTCCCTCGTTGCTGCTATTT  
CCCAGCATTGTGCATCGGCTTCGTCTCTCTTCTCCGCATTCTCCCTCATTCTCTGGGG  
TGCTAGTCGCCCCAAAAGCCCGCCATTTCTCTCAAGAGTATAACCTTTGATCAATTCG  
TGATAACAAGCCGGAGCGGACATGTCAGGAGTTGCCACAAGTTTGGTGTCCATGAATTC  
ATCTGTGAAAATGACGTTTCGTAACACCGCTACATTTTTCGGGGTCCATGTGACCTCAA  
CTCCCGTGGATCTCAATTATTATCAACTTACTCTAGCCACTGGAACATGCCAAAGTTTT  
ATCAATCTAGGAAGAGCCAAAGATCTGTTAGAGTGATGGTGATTGGGAGTCATATACCA  
CTGTACGGAGGAGGAGCAAACCTGAACAGTGTGAACGGTAAACCGGTTGAACCGGTG  
CCACTGACGTTGAGCGTGATGGTGCGGTCTAGGGCTTATGTTTTGGGCAAATTGGTGA  
AGCCAAAGTTCTACAAGAAAATAGAGTGTTCCATCGTTATGGATCCGAAGAAGATGGG  
CAAGGCCATTTCACTGGTCAAGAAATGCACTTACCAGTAA

>GmLEA2-91

ATGATGGCTGCAGATCAGCAAAGAATTCATCCTGTTTCATGATGTTGAGGCACCACACA  
GACCTTTGGTGCCTGAAAATATGCAAATCTGATAAGGGTATTCCTCAGCGCACTTTT  
CCTGTGATGCATTCAAAGCCACCTAAGAGAAGAAGAAGCTGTTGCTGTAGGTTTCATGT  
GTTGGACACTAAGCATATTGCTGATTTTGTGATCATTGCTATTGCCATCACAATAGGGATCC  
TATACCTTGTGTTTCAGACCAAAGCTCCCCAAATACTCAGTGGACCAACTGAGGATAAG  
CCAGTTCAATGTTTCAGACAACAACACCCTCTATGCCACCTTCAATGTGGCAATCACTG  
CAAGAAACCCTAACAAGAAGATTGGAATATACTATGAGGGTGAAGCCACATAAGTGC

TTGGTACATGGACACAAAATTGTGTGAAGGGTCCTTGCCAAAGTTCTACCAGGGTCAC  
AGGAACACCACAGTGCTTGATCTGCCTCTAACTGGTCAAGCACCTGATGCAAGTGGTT  
TGGTGAATAGAATTCAGGAGCAGCTGCAACAGACCAACAATGTTCTCTCAATCTTAA  
GGTGAATCAGCCTGTGAGGGTTAAGTTTGGTAAGCTGAAGCTCTTCAAAGTCAAGTTC  
AGGGTTAGGTGCAGGCTTGAGGTGGATAATTTTGGTGCTAGTAATGATATTAGAATTTCT  
AGCAGTAGTTGTAAGTTCAAGCTCAGGCTGTGA

>GmLEA2-92

ATGCTTACCCCTCCACCCCCACCTCCTCCCCGACTCCTAACCACAAGGCAAACCAAAC  
AAGTCTCTCCTGACCAAATTGTTCATATCAAACTACCAATCAAACAACATTCTCAAGAA  
TCAGATGCACCAAATTATGTTACAACAAAGTCAATTAGGCCGCCGCCACCGCCACCAC  
CACCACCACCAATACTCAGGCAACCTCCATTTCAAAGGACTAATCCAATCATATGGTTT  
GCTGCAGTGTTGTGCCTCATATTCAGCCTTCTACTCATCTTCTTTGGAGTTGTAACCTTG  
ATCATCTTCTAGGAATCAAGCCAAGAAACCCCTACTTTGACATCCCCAATGCAAACCT  
CAATGCAGTGTACTTTGACTCACCAGAATACTTCAATGGTGACTTCACCCTCGTTGCAA  
ACATCACCAACCCCAACAAGAAGATTGATGTGAGGTTTGAATCTTTTGATGTGAGCTT  
TTCTTCTCAGACAGGATCATATCAACACAGTCCATTGAGCCCTTTACACAGAGGAGAA  
GGGAGAGCAGGTTGGAGTCCTTGCACCTCATATCCAGCTTGGTGTTTTTGCCTAAGGAT  
CTTGGTGTGAACCTTAAAGGACAGGTGCAAGGGAACAGGGTTAAGTACAATGTAAGA  
GGAACCTTTAAAGTGAGAGTAAGCATGGGGTTTTTCCATTTGTCTTACTGGTTGCATAG  
CAGATGCCAGATAGAGATGACTGGTCCACCAACTGGTGTCTTGGTAGCTAGGAAGTGT  
ATCACAAAGAGATGA

>GmLEA2-93

ATGTCTCAATTAGCACCAAAAACAATTCATGACTGAATCACAAAGTAACCAGGACCACG  
AGCAAGTGGTGGTGTATCTCACAGAAAAAGCTAAAGAGGAGAAGAGTGTGTGTGATGG  
TCACAGGAGCAGTGCTGTTACTGCTCATTGTGCTAGTCATAGTGGCAATTATCTTGGCC  
TTTACCTTGTTC AAGACCAAAGAACCAAGA ACTCAGCTTGTGTCTGCCACTTTAGAAG  
GTATAGCACCTCGTCTCACACTTCCCTGCCATTGACCTACAAATCAATGTCACACTTGAC  
CTCAAGGTTCCGGTTGAAAACAGAAATCGTGCTAGTTTGAAGCATGAAGGGGGAAAG  
AGTGTGTTGCTGTATAAAGGAAAAGAGGTTGGAGATGCTTATATAAACCTGGTCTTAT  
TCCTTCAAGGGTTCTACTATTCTTCCATGCAGACTCACCTTCAGGTGGAAAAGCTAG  
CTTCCA ACTTGACCAGTTTAGTTGGTGATTTGATGGGGGGAGAGATCTCTATGGACACA  
GTTACTAGAATTCCTGGGAAAGTTACCTTCCCTGGATTCATCAAGAAACATATTGTTGC  
AGAGTCCAATTGCCAATTCACTATTAGTGTCTGAGTTGAAGATCACAAACCAA ACTT  
GCAAGAGTAAGGCCAAGTTATGA

>GmLEA2-94

ATGAAGAAGGGATCTGGCTGCAAAGGAAGCATTGTGTGCCTGATGGTAACATTATGTGT  
AGTGATTGCACTTGTATTGCTAGGAGTGATCTTAGCAATGACAGTGTTCAAACCTAGGC  
ACCCTATTACCAATGTGGATTCCGTAAGGCTTCAAACATGAGCTTGGACATGGACATA  
TTTAGCATGAGTGTAATGTGAACTTGACATTGGAAGTGGATGTTTCTGTTAACAACCC  
TAATAAGCTTGGATTCAATTACTACAATAGCTATGCTCAACTCAATTATAGAGGACAGTT  
GATTGGGGAAGCCCCTATACCCAATGGACACATATTAGCTGAGGAGATTAAGGGACTCA  
ACTCGACACTAACTGTTATGGCTGACCGTTTGGTCTCAAATTCTGAGGTGACCAAGGAT  
GTTGCATTGGGTTTATTGCCCTCAACAGCTTGGTGAGAATTTTTGGCCAAGTCAACGT  
TTTAGGGTTTATCAAATCTATGTGGCTTCCACCTCATCTTGTGATTCACCCTCAATCTT

TCCAATAGAACAATAGTGGACAATAAGTGCCAAGAGAAGACAAAGATTTTCGGGTTGA  
>GmLEA2-95

ATGCGTGTGGGTTTGGGTGTTAAGGTATCGTTGGGTGTGATCGGTGTGAGTCTAATATT  
TGCAGTGTGAAAATGTCGCAGTTGTTGGACAAAGCCAAAAACTATGTTGCGGAGAA  
AGTCACGAACATGCCCAAGCCCGAGGCGAGTGTACCCGACGTGGATTTCAAGCGCGT  
GAGCCGCGACAGCGTCGAGTACTTGGCTAAGGTCTCTGTTTCCAACCCTTATTCCACTC  
CCATTCCCATTTGTGAGATCAAGTACTCCCTCAAAGTGCTGGCAAGGAGATAGCATCA  
GGGACAATACCTGACCCAGGGTCACTGAAGGCAAGTGACACAACAATGCTGGATGTG  
CCAGTGAAGGTGCCTCATAGCATATTACTGAGCTTGGCAAAGGACATTGGTGCAGATTG  
GGACATTGATTACCAATTGGATCTTGGTCTAGTTATTGACCTTCCTGTCATTGGCAACTT  
CACCATTCTCTTTCTCAGAAGGGAGAGATAAAGCTCCCAACCCTCTCTGACATGTTTG  
CCTGA

>GmLEA2-96

ATGTCCCAGTTGAACGGAGCCTACTATGGCCCCTCCATCCCGCCGCCGAAAACCTCCTA  
CCACCGCCCAGGGCGCGGCGGAGGCTGCTGCTGCGGCTGCCTCTTCAGCCTCATCTTC  
AAGCTCATCTTAAACCGTGATAATCATCGTTGGCATCGCCGGGTTCTGTTCTGGCTCATA  
GTCCGTCCGAACGTGGTGAAATTCCACGTGACCGACGCCACCCTGACGCAGTTCAACT  
ACACCGCCAACAACACTCTCCACTACGACCTCGCCCTAAACATCACGGTCCGAAACCC  
CAACAAGAGGCTCGGAATCTACTACGACCGCATCGAGGCGCGTGCAATGTTCCACGAC  
GCAAGGTTTCGATTCACAGTTCCCGGAGCCGTTTACCAGGGCCACAAGAGCACGAAG  
GTGCTGAACCCAGTCTTCAAGGGTCAGCAAGTGGTGCCACTCAACGCTGAGCAAAGC  
GCGGAACTGAAGAAGGAGAACGCCACTGGGGTGTACGAGATCGACGTGAAGATGTAC  
CTTAGGGTGAGGTTCAAGCTGGGGGTGTTGAAGACCAAGACGCTCAAGCCCAAAGTA  
TCATGCGACTTGCGTGTTCTTTCAAAGGAAGCGCCGCTTTGAGACCACCAAGTGCC  
ACTGGGATCGCTGA

>GmLEA2-97

ATGGCCGATAAGCAACCCACCTGAACGGTGCTTATTACGGTCCCGCCATTCCCCCGGC  
GGAGCAACCACGCTACCGCCCTCACCGCGAAAGAAGCTGCTGCTGCTGCCTCTTCGG  
AATCTTGTGGAAGATTCTGGTTGCACTCATTGTCCTCGTTGGCCTCGCAGTACTCATATT  
CTGGCTGGTGGTTCAACCCCGCTACTTCAAGTTCTACGTACGGAAGCCGACCTAACA  
CAATTTGATTACTATAGCAACAACAACACCCTCCACTACAACATGGTCTCAACTTAC  
TGCACGCAACCCCAACAAGAAGCTCAGCATATACTACGACAAGGTTGAGGCATTAGCA  
TTCTACGAGGATGTCAGGTTGCGCAATTACAGTGTGATAACGCCCATGAACTCCTTCCG  
GCAGTACAAGAAGAGCAGCAGCACCATGAGCGCTGTTTTATCGGGGCAGCAAGTGTT  
GCCGCTCGACAACGACCTAGTCTCAGAGTTGAACCAAGACAAGATTGGTGGGGTGTA  
CGAGATCTATGTGAAGCTCTACTTCAAGATTAGGTTCAAGGCTCGGGGATGTCAAACCC  
GTCGTTCAAGCCAAAGGTCAAATGTGATGCGAAGGTTCCCTTGAGGACCATGGGCAA  
CGTAACTCTGTTTCAGACCACCAAGTGTGATGTCGATTACTAG

>GmLEA2-98

ATGGCCGATAAGCAACCCCACTTGAACGGTGCTTATTACGGTCCCGCCATTCCCCCGGC  
GGAGCAACCACGCTACCGCCCTCACCGCGCAGAAGCTGCTGTTGCTGTCTCTTCGGA  
ATCTTGTGGAAGATTCTGGTTGCACTTATTGTCCTCGTTGGCCTTGCAATCCTCATTTTC  
TGGTTGGTGGTTCAACCCCGCTACTTCAAGTTCCATGTCACGAAAGCCGACCTAACAC  
AATTTGATTACTATAGCAACAACAACACCCTCCACTACAACATGGTCTCAACTTCACT

GCACGCAACCCCAACAAGAAGCTCAGCATATACTACGACAAGGTTGAGGCATTAGCAT  
TCTACGAGGATGTCAGGTTTCGCCAATTACGATGTGATCACTCACATGAACTCCTTCCGG  
CAGTACAAGAAGAGCAGCAGCCCCATGAGCGCTGTTTTACGGGGCAGCAAGTGCTG  
ATGCTCAACAATGAACAAGTCTCAGAGTTGAACCAAGACAAGAATGCTGGGGTTTATG  
ACATCTATGTGAAGCTCTACTTCAGGATTAGGTTTCAGGCTTGGGGACGTCATATCCAAT  
GACTACAAGCCCAAGGTCAAATGTCACCTCAAGGTCCCTTTTAGTAAAAATGGCACCT  
TACTCTGTTTCCGACCACCAAGTGTGATGTCGATTTCTAA

>GmLEA2-99

ATGTCGGTTAAGGAGTGCCACCACCACCACAAGGGAAAGAAGCACAAGCTCTGGAGA  
CGCATCTTCTGGGGAATAGTGATCTTCGCCTTCATCGTGTACTGACAGTTCTTATAATC  
TGGGCAATCCTAAAGCCTTCAAACCAACCTTCATCCTCCAAGACGTCACCGTTTACG  
GCTTCAATGCCACCATCCCCAACTTCCTCACCTCAAGTTTTTCAGGTCACGCTTTCCTCG  
CGCAACCCCAACGACAAAATCGGAATCTACTACGACCGTCTCAACACCTACGTAACCT  
ACCGGAACCAGCAGGTCACGTACCGAACCTCAATCCCACCCTCGTACCAAGGTCACA  
AGGAAGAGGATGTGTGGTCCCCGTTTGTCTACGGCACTAATGTCCCCGTCGCACCCTA  
CAACTTCGTTGGCCTCAGTCAAGACCAGACCAACGGCAACGTCCTCGTCTCGTTAAG  
ATTGACGGTAAGGTACGATGGAAAGTTGGTTCCTTCGTCTCTGCTCACTACAACCTCAA  
TGTAAGGTGCCCTGCTTTCATAACCTTTGGCCCCAAAGCAACGGGATTGCCCTTGGC  
AATAACGCCGTTAAGTATCAATTGGTTCAACGCTGCACCGTCGGGGTTTGA

>GmLEA2-100

ATGTCAAAGGACAAAGTTTCCGGTGATCCAAGACGTGCAGTGTGCACAGGTATCACCA  
TCTTCCTCCTCTTAGCCGGCGTCACTCTCCTCGTCTCTGGCTGGTCTACCGTCCCCAC  
AAGCCGCGCTTCACGGTCATCGGCGCCGCCATCTACGGCCTCAACACCAGCACGCCGC  
CGTCTATGTCAACCACCATGCAGTTCTCCGTCCTCATAAAGAACCCGAACAGGCGTGT  
CTCCATTTACTACGACAGGTTCTCCGCCTTTGTCTCGTACAGGAACCAGGCCATAACGC  
CGCAGGTTCTGCTGCCACCCCTGTACCAGGAGAAGCGCAGCTCGGTTTCGGTGTCCCC  
GGTGATCGGAGGCACGCCGCTCCCGGTGTCCGGTGGAGGTTTCGAACGGGTTGGCGAT  
GGACGAGGCTTATGGGGTGGTGGGTCTGAGGCTGATATTTACGGGCAGAGTGCGGTGG  
AAGGCTGGGGCCATCAAACCTGCGCACTATGGGCTCTACGTTAAGTGCATGTTTTGAT  
GGGTTTGAAGAAAGGTTGGTGGGTCAAGTTCCTCTCCTCGGAGTTACACCCTGCGAT  
GTCGATCTATGA

>GmLEA2-101

ATGTCTACATCTGATAAGTCAGAAGTGGTGGAAAGGGGTGCTAAGGATGATGAAAAGC  
CAAAGGAAGAACATGAGAAGGGTGGATTTCTTGATACAGTGAAGGATTTCAATCAAGA  
CATGGTGAGAAGATTGAGGGAGCAGTTGGGTTTGGGAAGCCAACTGCAGATGTCAC  
TGGGATACACATTCCATCAATTAATCTTGAGAAGGCAGAGCTAGTTGTTGATGTTCTTAT  
AAAGAACCCGAATCCGGTGCCAATTCCTTAATTGACATAAACTACTTGGTTCGAGAGT  
GATGGGAGGAACTAGTTTCGGGATTGATACCAGATTCCGGGCACAATCCATGCACATG  
GAGAGGAGACAGTCAAGATTCCTCTTACTTTGATTTTTGATGACATAAGGAATACCTAT  
GATGATATTAACCAGGAAGCATCATTCTTATAGGGTGAAGGTTGATCTCATTGTGGAT  
GTTCTGTCTTTGGAAGGCTCACTCTACCTTTGGAGAAAACCTGGAGAAATCCCCATTCC  
ATACAAGCCTGATATTGATCTCGATAAAATTCAGTTTGAGAGGTTTTCTTTTGAAGAGA  
CAGTTGCTATTCTTCAATTTGAAGTTGGACAACAAGAATGACTTTGACCTTGGCCTCAAT  
GCTCTTGATTATGAGGTCTGGCTTGGTGTGTTAGCATTGGAGGAGCAGAACTTGCCAA

ATCTGCAAAGCTCGTGAAAAGTGGGATTAGTGACATTGATGTTCCAATTACCTTCAGGC  
CTAAGGATTTTGGCTCTGCTCTTTGGGACATGATTAGAGGAAGGGGGACAGGCTACAC  
TTTTAAAGGACATATTGATGTTGACACTCCCTTTGGAGCAATGAAACTGCCCATCACGA  
AAGAAGGTGGTACTACCCGTCTCAAGAAGAATGAAGACAGTGGAGATGACGAGGAGT  
GA

>GmLEA2-102

ATGCACAACAACGACCACATAACCCGTTCCACCACGTCCAGGGTCCGAACCCGAAGCCC  
GTTAAACTGAACCGGCACCACACGATGCGGTACTATGCCACCCGTGTCCACGAAAGCC  
TCACAACCCGCGTCTCCAAGATGATCTGTGCCACCTTCTTGGGCCTTCTTTTCATTGTG  
GGCCTCATCACCTTCATCCTCTGGCTCAGCCTCCGGCCCCACAGGCCAGGTTCCACAT  
CCACGAGTTCAACATAACCGGGCTGACCCAAGATTCCGGGTTTCGAAAACGCCGTCATA  
ACGTTCAAAGTATCCGCGCGAAACTCCAACCAGAACATCGGGGTTTACTATGAGTCCA  
TGGACGGCGCCGTTTATTACCGCGACACGAAAATTGGGTACACGCCGTTACTTTACCCG  
TTTTATCAGCAGCCCAAGAACACGACGGAAGTGGACGGCGATCTTAGTGGGGCGACG  
TTGACCGTTAGTAGTCAGCGCTGGTTCGGAGTTCCAGAGCGATAGGGCTGACGGTAGCG  
TGGTGTTCGCTTGAATTGACGTCTGTGATCAGATTCAAGATATCCACGTGGGACAGC  
AAGCGCCACACGATGCACGCCAACTGTAATGTGGGCGTGGGACCCGATGGTTCCTCC  
TGACCATTTATAAGGACAAGAGGTGCCCCGTTTATTTCTCTTGA

>GmLEA2-103

ATGGCAGATCATCAGAGACTGAGGATCCACCCTATGGAGGGGGAAGCACCACCACCAC  
CCCCAACAACTCCATTGGTACCTCCAGGCTCGTCAAATCAGAAAAGCGTATCCCTTTA  
CACCATCCTCCACAACACTACGTGCTATGCCAGCAGCATAACCCTACAGCACACAAAAGAA  
GCTGCTGCTGCAAGTGCATATGTTGGATAATAACCTTGCTTGTCTCCTCCTCATTATCT  
TGGCTGCAAGTGTGGAACTCTACCTAGTCTTCAAACCAAAGCTTCCTGATTACTCA  
GTTGACACCCTCAGGATAAGTGATCTGAGGCTTAACTTTGACATGAGCCTCTATGCAAG  
GTTTGATGTGAAGATCACAGCAACCAACCCAAACAAGAAGATTGGCATATACTATAAA  
AAGGGTGGAAAGGTTGAGTGTGTGGTACACAAACACAAGGCTTTGTGAAGGTTCACTG  
CCACAGTTCTACCAAGGTCATGAGAACAAAACAATGCTCAATGTGTCTTGAGTGGTC  
AAGTGCAGTCTGGAAGCACCTTAATGAATGCACTGCAGCAGCAACAGCAGACAGGGC  
GCATTCCATTGGATCTCAAGGTGCATGCACCAATAGCCATCAAACCTTGGGAGGTTGAA  
GCTTATGAAGGTGAGAGTCTTGGGAGAATGCCTTTTGGTGGTGGATAGCTTGTCTATA  
ATAATCTCATAAGCATCAAGGCTAGCAACTGCAAGTTCAGATTGAAACTTTGA

>GmLEA2-104

ATGGCCACCACAATGCCGAAATTCAAGCGAAAACCTTGTGATGGGTGCAAATGGTCGCA  
CCAACCCCTTGGTGTGGCTAGTGGCGATTATCTGCACCATCATAGCAGTAGCAGTGGTA  
GTTGTAGGCATTGTAGTGTTCATTGGTTACATAGTGATAACCCCTAGAGTGCCTGTGATC  
AGTGTACCAATGCACATTTAGATCTTCTCAGAAATGACTATGCTGGTTTGTCTCAAAC  
CCAACCTACCATCGTCGTGACTGCGAAGAATGGGAATGCCAAGGCTCATGCATCCTTC  
TCCGCGATCACCTTCAACATCAGCTACCAGGGCCAAGACATTGCTGTGCTTGTGCTGA  
CCTTTTGAGGTGCCAAAGAACAGCTCAAAGGACCTCAGCTATGTTGTCCAATCTTCTT  
CTATACCCTTGACTCCTGATCAAATGGAGGAAGTGAATGATGCTTGGAAAGAGGAATGA  
AATTGAGTTTGACTTCAAAGGGGCTGCAAGGACACAGTGGAGGGTAGGGCCTTTAGG  
GTCTGTGAAGTTCTTGTGCCATCTTGATTGTGACCTCAAGTTTCGCCCCGTGAATGGGA  
CTTACATTCCTCGCGGTGCACCTCAAATCACACTGA



>GmLEA2-105

ATGGCCGATAAGCAGCCACACTTGAACGGTACCTATTACGGTCCC GCCATTCCCCGGC  
GGAACAACCACGCAATCGCCATCACCACGGAAGAAGCTGCTGTTGCTGCCTCTTTGGA  
ATCTTGTGGAAGATTCTGGTTGCACTCATCGTCTCGTTGGCCTCGTATTCTCATATTC  
TGGCTGGTGGTTCAACCCCGCTCCTTCAAGTTCAGGTCACGGAAGCGGACCTAACCC  
AATTTGATTACTACACCAACAATCTCACTCTCCACTACAACATGGTGCTCAACTTCACT  
GCACGCAACCCCAACAAGAAGCTCAGCATATACTACGACAAAGTTGAGGCATTAGCAT  
TCTACGAGGATGCCAGGTTGCGCAATTACGATGTCATAACTCACATGAACTCCTTCCGC  
CAGTACAAGAAGAGCACCAGCCCCATGAGCGCCGTTTTCTCGGGGAAGAAGGTGTTG  
ATGCTCAACAGCGAACAAGTCTTAAGTTGAACCAAGACAAGAGTGATGGGGTTTATG  
ACATCTACGTGAAGCTCAACTTCAGGATTCGGTTCAGGCTCGGGGACTCCATATCCGGT  
AACTTGAAGCCCAAGGTCAAATGTCACCTCAAGGTTCCCTTCAGTAAAAGTGGCACCT  
TACTCTCTTTGAGACCACCAAAATGTTCTGTCCATTTCTAA

>GmLEA2-106

ATGGCAGAAATGCAGATACAACATCAAGAAGACCATAACTATAACCCTAATCACATCCC  
TCGCCCTAGCCCTAGCCCTAACCCCTACCCAATACACACAATACCGTTTCCCTGGCAAAG  
TTCCCCACCACCAACACCAAGTCCACAACATGGACAAAGCCACACCTTCTCGTTCAA  
ACCTAATGCCCCCAACGTCAACACTGCATTTGCATAACCGTTTTCTCCTCTTACTCG  
GCATCATACTCCTCGTTCTCTGGCTGGCCTACCACCCTAACAAGCCGCGCTTCACGGTG  
GCCAGCGCCTCCGTCTACAGCCTCAACGCCACGTCGCCGCCACTAATGTCCATCGCCAT  
GCAGTTCAATGTGGTCATAAAAAACCCTAACAGGCGCGTCTCCATTTCTTTGACAGG  
CTCTCGGCCTACGTGTCCTACCGCAACCAGCCCGTGACGCCGCACGTGCTTCCGC  
CGTCTTCATAGAGAAGAACAGCGCCGTGTGCTGTCCCCGGAGATCGGAGGAGTGG  
CGGTGCCGGTGTGCGGAGGACTTGACCAATGGAATGGCCATGGACGAGAATTATGGGGT  
GGTGGGCGTGAAACTTGTGTTGTCCGGAAGGTTGAGGTGGAGAGCTGGTGACATCAA  
CTCTGCACATTATGGTTTCTATGTCAAGTGTGATGTTTTGATGGGTTTGAGAAAAGGTTT  
TGTGGGTCAGGTTCTTCTTGGAGCTCCAGTTTGTGATGTCAATACATGA

>GmLEA2-107

ATGCCTAGGGAAAACCCTGATTACGAGCTTCTTTTTGCCGCATGGCTGCCACATGCAT  
TGCCTTCTAATCATTATCCTAATCTTTGTTCTGTGTATTATCTTTTCAACTTACACACC  
TCCTTACAGTACGTCGATCACCGTCTCAAATTC AACGTCACCACTCACGCAGAGG  
AGTTAACGGCGACTTTCAACGTTGAGGGCATTCTTGAAAACCCTAACCTGGCGTACTC  
CATAAGGTACCAGAGCCTGGACCTCGCGCTCTGGTTCGACA ACTTCACCATCGCCTCC  
ACTACAATCAAACAACCACCTTCTCCACCCAAGGCCAGACCGACACCCAGTTCGGG  
CCCAGTTTGCCATGGCCCGCAGGTGGTTACCTAGCGGCTTGGCCAGTGAAATTGTGGC  
GCAACGAAATTATCATGGTTCAGTGGATTTTGGAGCCACATTGGTTGCTCGGTTCAAGT  
ACAAATTTGGCGTGTGCACTCCAAGAAGGTTTCATATTTCAAGCTTTATTGTGATCCG  
TTGCATGTTGCACTCCATTCTAACAGTACTACGGGAAAGTTGGTTGCTCTTGTGATTGT  
AAATCAGTTTAA

>GmLEA2-108

ATGCCTTGCAAACCCCGCTGCATCTACTGCACAATCTACATATTTATATTCATTTTCATGC  
TTTGCTTCTTCTCTTCTTGATAATAATCAACCCTTCAAGTGTCAAGTTCTACGTA ACTG  
AGGCCACCCTCACACAATTCAACCTCACAAGCAACAACACCTTGTATTACAACTTCAA  
GGTCAACATCACAGTGACAAACCCCAACAAGCACATGATAGTGTACTATAGGACGATC

AAAGCAATAGCTTGGTACAAAGATAATGAGTTTGTATAGGGTGAGCTTAACACCCTTTGA  
CCAAGGCTACAAGAATACCACCTTTCTTCGAGCAGTGTTTGTAGGGCAAAGTGTGATTA  
TGCTCAAACCTAAACAACCTTGGTGAGTACAAAGATGAGACAAGTATTGGGATTTACAA  
TGA CT TGGCTGTGGATTTTGTATCTTAGAATTAGAGCCAAGTTTGGAGAATTAAGAGCA  
GGCGATTCAAATTTGATTTCTTAAAGTACTTGTGCGGAGAGA ACTGTAGGAGTTTTGGC  
AATTA

>GmLEA2-109

ATGGTACATAATTGCTCCTCCACCGCCTCCCTGATTGGCCATAACTTGTGCCACGTTATT  
CAAGGCCTCGGTAAGAAGTCATTCTCGCTCATTCTCGCAGTCATTACTCTCTATGTCAC  
TCGCTCAAGCGTTCTTCGTTAGCAATTGTGACGTTTCTGGTGCTTTCTAGAGCTCCTCC  
TCCGATTGCTCTGTAAAGTGTGCGCATCGTTCAAAGGGTGTTGTTGCTGTCTCTTCTTCT  
ATTCCC GTT CCTAGCGTTGCTGGTGCTAGCGGTGGTGCTGGTAATAATCGTAGCGGTGA  
AGCCAAAGAAGCTGCAGTTTGTATCTGGAGCAACTGGGGGTGCAGTACATGGGTATCAC  
ACACAATCCCCCTCAATCGCTTCCCTCTCTCACCATTACCTCCTCTTCGCTGCCAC  
CAACCCCAACAAGGTTGGGATCAAGTACGGCCAGTCCAGCTTCACTTTCATGTACCGC  
GGCATCCCATTGGGAAAAGCCACCATTTTCGACTTCTTCCAACAGCCTTACAGCACCC  
GACAACTCATCGCCGTTGATCGCGTCAATTTGCTTGAGGTCGATGCCGCTGATTTGATT  
CGAGACGCCTCCCTTAGATTCTTGGGCGACGTTGCTGCCAAGATCCGCTTTAACCTGA  
GGACTGCATCTGGAGACGTTGTCCCTATCAACTTAGAAATTGAAGATACTTGTGCGCGT  
AGCAACGCTGCAAGAAGAAGAAGGGAACAAGACACAGAAGGAAGCAGTTACACCTC  
GCCTCCTCTTTCTCCGCATCACGCTAAAATGGACGGGGAACCGGCACGAAGAGTCACC  
CTTGAGGACTTCTCCAATACCGCCACTCCTCATTCTTACGAGCATTGCAAAACCGGA  
GGTACAAGCCGCCAATATTTGCTACCCACACTCCCTTATTCAGCTAATCCAAGGGAACC  
TCTTCCATGGTCTTCCAAGCGAAGATCCATATGCTCACCTCGCTCGTACATAGAAATAT  
GCAACACCGTAAAAATCGCTGGAGTCCCAGAAGATGCGGAAGAAGTAGTGGAAAAGT  
TCTTAAAGAAGTACTTTCCAGAGTCAAAGACTGCTGAAGGGAAAATGGAGATTTCTTC  
TTTCCATCAATCCC GGATGAGTCCCTTAGCGAAGCACTAGACCGTTTTTCACGGGCTGT  
TACGAAAGACACTGACACACGGATACAGCGAGCCGGTACA ACTGAACATATTCATCGA  
TGGCTTGC GGCTCAATCGAAACAGCTACTAGATGCATCTGCAGGGGGAAAATCAA  
CTGAAGACTCCCAAAGAAGCGATGGAGCTCATCGAAAACATGGCAGCCAGTGATCAA  
GCAATCCTTCATGATCGTAGCTATATGCCACAAAAAGAAGCCTTTTGGAACTTGGCAC  
ACAGGACGCGACATTGGCACATAACAAGCTGTTGACGAGGCAGATAGAAGCCCTTACC  
GAAACCCTCAGCAAATTACCTCAGCAATTACAAGCGGTAAGTTCTTCCCACTCTTCTGT  
TTTGCAGGTAGAAGGATGCCCCACATGCGGAGGAACCCATGAGCCTGGACAATGTGTA  
AGCCAACAGGATACCTCTCAAGAAGTAAACTATATGGGCATACCAAATCGCAGATTCCA  
GGTTACAACCAGGGGAACTCATCTGGATTCCACCAAGGGGGAGCAGGATTCAATCAC  
GGACCACCGGATTCAATCAAGGAAGAACTTCATGCAAGGT  
TCAGGGTGGAGGAATCAGGGAAACAGTACAAGGAGCAAAGGAACCAACAACCATA  
CCAACCGCATGCCCGCATCCAGCCAGGGCCCCAATCAGCAAGAAAAGCCACCAAT  
ATAGAAGAACTGTTGCTGTAA

>GmLEA2-110

ATGTCTCTTCTTCTTGTATCATTGTTGCTATTGTGATTGTTGCATTGTTTTTACCATCTT  
TAGACCCAAGGATCCTAACATCATTGTCCACCCCGTTGGCTTCGAAAACCTTAAACCCTT  
CCCTCTTAAACCAATGTGACCGCAATGTGAGCCTCGGCATGCTTACTATCGAGAAT

TCAAACATGAAAACCTTTGAGTACCCAAATGCCACTGGTTATATCAAATTCATGACAC  
CGTTGTGGGCCAAGTTCCAATTGTGGGAGAGTTGGTCCCACCGCGAAGCCAGATTAAT  
GTGAACACTTCGGCAAATTTTCATGGTAGCAAAGTTAATCAATGACCCCAATTTTTGTGTC  
AGATTTTCTAAGTGAATTGTGAATTTACATCAACAGCTTCACTGCCTGGGAAAGCGC  
ATATGCTAAAGATTATCAAATTCAGGCCACAGTTTATAGCTCGTGTGACATCTCTCTTA  
ATATAACCTCTAGGAATGTTGATTCCAAATGCATATCCAAGATCAAGCTTTGA

>GmLEA2-111

ATGGTGGCATGTTGCAGTATGAGGTGTTCCAAAGGGCTTAAAATCTGCTGTGGTGTGAC  
TGCCCTTCTTCTAATTATATTAATAGTAGTACTGGTGGTCTTGTCTTCACTATCTTCAAG  
CCTAAAGACCCCGACATTGTTCTGCAGTCAGTTAAGCTTGACGGTTTCAAACCTGAAG  
TCTTCCCAACTCTGAAACTAAACGTATCACTAGGCATAGTGGTGACGGTTGAAAACCC  
AAACCATGGAAGCTTTACCTACCAGAACAGCACAGCTTTTCTTTACTATCGAGGAAATC  
TTGTTGCTGAGGCTCCACTACACCAGGACACAATTCCAGCTCGTAACGATCATAATATA  
AGCACATCTTTGACTATTTTTGTAGATCTCACAAAATTTAAGGATTTACCCAGTGATTAT  
TCCGGGGGCGTTATAAATTTTACCTCAACAACCACCTTACTGGGGAAAGTCAAGGTATT  
GGACCTTTTCAAGATCAAGGCCACTAGTACTCCACCTGTGATCTCTCTCTATTCGTA  
TGACCAAACCATCAATTCTACGTGCAACTCTGAAATCAAATTCTGA

>GmLEA2-112

ATGTTTTTTTTGCTGAATCCCCTAATGATATATTGAAACCGCGCCGCAACATAGAGCCC  
TCTCTCTCTCTCCCTCCCTCTCTCTTCCCTCTCTCTGTTGGAAGAACAAGTAGAAG  
AAGCAACAGAAAACAGAACCACCGAACCCACTCAGAACCACCAGTGCTTCGAAGTAG  
CGGCGCAAAAACCGCTCTGCAACCCGCACCGCTCCGCCGCGACCCAAAACCTGCGCC  
GCTACACATGTGCCCGTCGCGGATGGGTGCCACTCTGCTCCGCCCTGCTGCTATAGCGG  
CCGCAACGGCTGCTATTGACAACCTATGTTAACACCACTTATTCTGATTGTTGACTTC  
AGTGACTATTCCCTTGCATTGAATTTAGTTCTTCCGTTCTGTCAAGCAAAAAGCAATA  
CCATCACTCCGCTTTAATGGCAGTTCCGTTGAACAGCCTTTAAAGTGTAATCCTACGC  
ATCCCCGTTCAACAGTTTCTCTTCTCAATTTTCGTGACTGCCGACTATCATTTGATAACG  
GATCCTTTGAAGGAACAAGCAGAATAAAGGTAGGATCTGGTAAAGGGAGAAAAGTGT  
GCCTGACGGTGACAGGTGTTGTGATTGCAATTGTATTGCTAATTGTGATACTAGCGTTG  
ACAGTGTTCAAAGCCAAGCATCCTGTTACCATAGTGGACTCAACGAAGCTAGAGGACT  
TTCACGTGAGCTTGGATCCAGTAAAATAAGGGTAGATTTGAATGTGACCTTGGGAGT  
GGATGTCTCAGTGAAGAACCCGAACAAGGTGGGATTCCAGTATTCAGACAGCGCTGCC  
CACCTCAATTACAGAGGGCAGCTGATAGGTGAAGTCCCGATCTCTGCCGGAGAGATTT  
CATCCGGTGAGACCAAAGGATTCAATCTCACCCACACCATTATGGCCGACCGTTTGCTC  
TCCAATTCTCAGCTTTTATCTGATGTCACATCTGGTACATTGCCCTAAGCACTTTCGTG  
AGGATGTCTGGGAAAGTCAGCATCTTAGGCTTTATCAAAGTCCATGTGGTTTCTCCAC  
TTCTGTGATGTTGCAATTAATCTTTCTAATGAACTGTTGGGAACCAAGAGTGCCAA  
ACAAGACAAAACCTTTGA

>GmLEA2-113

ATGCTTATCACTATAGAGAATCCAAACTATGAAAACCTTTGAGTACCCAAACGCCACTGG  
TTATGTCAAATTTCTTGACACCGTTGTGGGCCAAGTTCCAATTGTGGGAGAGTTGGTCC  
CACCACGTAGCCAGATTAATGTGAACACTTCGGCAAATTTTATGGTATCAAAGTTAATC  
AATGATCCCAATTTTCTGTGATTTTCTTAGTGGAATTGTGAATTTACATCAACAGCT  
TCACTGCCCGGAAAGCGCATATGCTAAAGATTATCAAATTCAGGCCACAGTTTATAG

CTTATGTGACATCTCTATTAATATAACCTCTCGCAATGTTGATTCCAATTGCATATCCAAG  
ATCAAGATTGA

The amino acid sequences:

>GmLEA2-1

MPPHRDRDHDHDDDHVAEHHHHHHHRPIRRKLVNTHHSGKTHPLIWLAAILCTIIAIGVVI  
AGIVVFVGYMVIHPRIPVISITNAHLDLLSNDYTGLLQTLTIIVVAQNGNAKAHATFSDIR  
FNLSYQGGQGIAVMLAPPFDVAKNSSKPLNYVVRASAPILTPEQMEEVDESWKRDVIGFDLK  
GSARTRWRVGPLGSVKFWCNLECQLRFRPSNGSYIHHSRCTSESK

>GmLEA2-2

MAKSIQQERRSGKCFVYLLAAFVILCALVLVFAALLRVKNPYLKLRSATSNKISYSTSPSN  
ATLIIFLGIKNPNFGAFSYNNNRVSVLYAGVKIADRQINGGRVRFRETKEINVTVKLMSAKA  
PISENLSIDISSGSLNLTSNVKFSGTVHMLKIINIRKTIEMACAMKLNLTSHTIQGIQCQ

>GmLEA2-3

MCPWAWVMFHFATSIHPSSHSNTERAMAKPENRTNLASCFVATVFLIFLLIVVFIVYFTVFK  
PQYPKIAVSAIQIPSFATNGTVNFTFSQYASVRNPNRGTFSHYDSSLQLLYYGRQVGFMFV  
PAGKIAAGRTQYMAATFTVQSFPLGLGPTSVDGPSSVGPTMEMESRIEMAGRVRVHLHFS  
HHVEAKAQCRVAIAINDGSVLGFR

>GmLEA2-4

MPAISPAYYAPNYNLLHHSPLYNEINALSQISNIFVKSLCIWLLQVIGLLSLIVLCLWLALR  
PKSPYSIVFISIGQPSNSNENNTIFYNLDIENPNKDSIYYDDTILSFLYGEQEDDVGETTIG  
SFHQGTGNTRDVS DTVNAKPRPFKPLLNAINATRVKSCFDHKISIQDMGN

>GmLEA2-5

MSECEHHKGGKRRKIFRQVFWCIVVFLFLVLLTILLIWAILRPTKPTFTLQDVTVYAFNATIPN  
FLTSNFQVTLISRNPNNDIGVYYDRLEIYVIYRSQQITYRTAIPPTYQGHNEINWSPFVYGT  
NIPVAPFNFLRLSQDQSDGNVLTIRADGRVRWKVGAFIGRYHFYVRCPAFISFGPRSNGI  
VVGENAIFQIIQRCSVSV

>GmLEA2-6

MSHLNGAYYGPSVPPPYSYHRPSRGGRDGCCCGCLSCFCGCFDCILGLICKILTILIVAIL  
GFLFWFIVRPVNLKFHVTDASLTRFDYTTNNTLHYDLALNVSIRNPNRRVGVYYDHIEAH  
ALYQDVLFGNQTGLPFFQHHKNTTFVNPLFKGQRTPLAGNQVEVDFKEKSGSVYTIDL  
KLFMVVRFKFLFKSASVKPKIRCALHVPLKSRNATTTISPDAAFQPTECGWDYGKKWWI  
H

>GmLEA2-7

MADPQKIHPVHHDVEAQNHPSAPLVPRSMSKSDAGDPQRVVVQQQQNIPLKQTKPPPK  
KRRSCCRFFCWLISILLILIVAIGITVGILYLVFRPKLPKYSVDELRVTHFDLADNNSLSVTF  
NLTITARNPNKKIGIDYRGGSHISAWYMDTKLCEGSLPKFYQGHRNTTVLSIPLTGKTQDA  
TGLQSTLQNQLQESGNVPLNLKVKQPVRILGKLLFKIKFRVRCKIVVDSLSANSSIRIQS  
SSCKFRFRL

>GmLEA2-8

MADRVHPSHSPSVSADSQPASPQDSSVVPKPLPPSSEKPVPPPPTYVIKIPKDQVYRVPPP  
ENARRYDQYTRRKHRRSRCCCCFCWLGILFILVFLAIAAGVLYLVFRPEEPKYSIENIAV  
RGINLTSPSSTAAMSPVFNVTVKADNPNDKIGIRYLKDSAEVFKDARLCNGALPAFYQP  
SNNVTVFGTALRGDIELRSEVRRALLEAQTKRRVPLTVRIRAPVKIKVGSVKTKITVKV  
NCHMTVNELTARAKIVSKRCNYDVDLW

>GmLEA2-9

MSTSDKPEEVERGSKDEKHKEDDQEEGKGGFIEKVKDFIHDIGEKIEEAIGFGKPSADVTAI  
HIPSINLHKADLVVDVLIKPNPVPPIPLIDIDYLVDS DGRKLV SGLIPDAGTIHAHGEQTVKI  
PVTLIYDDIKQTYADIKPGSIIPYRVKVS LIFDVPILGR LTLPLEKTGEIPIYKPDIDLEKIHFE  
RFSFEETIATLHLKLENKNDFDLGLNALDYEVWLG DV SIGGAELTKSAKIEKSGISYIDIPIT  
FRPKDFGSALWDMIRGRGTAYTIKGHIDVDTPFGAMKLPISKEGGTTRLK KKKKEDRDYDD  
DDDDEQE

>GmLEA2-10

MPTESGPNVVANEELGTPKQPRNQHSQQSGAPNSLANTRAIFGQPR LQRTKPIIWCAAIMC  
FIFSLVLIFFGIATLILYLSMKPRNPTFDIPNASLVVYFDS PQYLNGEFTLLANFNSPNRRIG  
VRFESLNIELFYSDRLVSSQTIKPFTQRPRENRLQSVNLISLVFLPQDVG VKLQRQVENNR  
VNYNARGTFKVRFNVGLIHLSYSLYSTCQIEMTSPAGILVARQCITNR

>GmLEA2-11

MKVGSGKGRKVCLTVTG VVIAIVLLIVILALT VFKAKHPVTTVDSTKLEDFHVS LDPVKLR  
VDLNVTLGVDVSVKNPNKVGFQYSDSTAHLN YRGQLIGEVPISAGEISSGETKGFNLTLTI  
MADRLLSNSQLSDVTSGLPLNTFVRMSGKVSILGFIKVHVVSSTSCDVAINLSNGTVGN  
QECQYKTKL

>GmLEA2-12

MSQLNGAYYGPSIPPKTSYHRPGRGGGLGCCCGCLFSLIFKLILT VIIIIGIAVFLFWLIVRP  
NVVKFHVTEATLTQFNYPNNTLHYDLALNITVRNPNKRLGIYYDR IEARAMFHDARFDS  
QFPEPFYQGHKSTNVLPVFKGQQLVPLNADQSAELKKENATGVYEIDVKMYLRVRFKL  
GVFKTKTLKPKVSCDLRVPLKGSAGAGVFQTTKCDWDR

>GmLEA2-13

MADKQPHLNGAYYGPAIPPAEQPHYRPSRERSCCCCLFGILWKILVALIVLVGLAVLIFWL V  
VQPRSFKFHVTKANLTQFDYYTNNNTLHYNMVLNFTARNPNK KLSIYYDKVEALAFYED  
VRFANYSVITHMNSFRQYKKTTSHMSAVFSGQQVLPLDNDLVSELNQDKSGGVYEIDVKL  
YFRIRFRLGDVKTRRFKPEVKCDIRVPLRTNGSVTLFQTTKCDVDY

>GmLEA2-14

MADYKQHHGRSCGCCCLFGILWKIVVALIVLVGLVFLIFWL VVQPRYFKFHVTEADLTQFE  
YYPNNTLHYNMVLNFTARNPNK KLSIYYDKVEALAFYEDARFANYDVITHMNSFRQYK  
KSTSPMSAVFSGQKVLMLNNEQVSQFNQDKSVGAYDIYV KLNFRIRFRLGDSISRHLKPK  
VKCDLKVPLNKSGTFTLFQTTKCHVNV

>GmLEA2-15

MADKHGRSCCCCLFGILWKILVALIVLVGLVFLIFWL VVQPRSFKFQVTEADLTQFDYYTN  
NHTLHYNMVLNFTARNPNK KLSIYYDKVEALAFYEDARFANYDVITHMNSFRQYK KSTS  
PMSAVFSGKKVLMNSEQVSKLNQDKSDGVYDIYV KLNFRIRFRLGDSISGNLKPVKCH  
LKVPFSKSGTFTLFETTKSAVAASLESCGRFWLHSSSSLASYSSYSGWVFN PAPSSSRKR  
T

>GmLEA2-16

MADKQPHLNGAYYGPAIPPAEQPRYRPHSHRGRSCCCCLFGILWKILVALIVLVGLAVLIFW  
LVVQPRSFKFHVTEADLTQFDYYTNNNTLHYNMVLNFTARNPNK KLNIIYDKVEALAFY  
EDVRFASYDVITHMNSFRQYKSSSPMSAVFTGQQLMLNNDQVSEFNQDRNTGVYDIY  
VKLYFRMRFRLGDFISNDYKPKVKCHLKVPFKNGTFTLFQTTKCDVDF

>GmLEA2-17

MILPYHFKTLKYQTSNSSLFSLHSSLLSSFPHKTSVRNISTLTMSVKECHHHKGGKHKHLWR  
RIFWGIVIFAFIVLLTVLIWAILKPSKPTFILQDVTVYGFNATIPNFLTSSSQVTLSSRNPNDKI  
GVYYDRLDITYVTYRNQQVITYRTSIPPSYQGHKEEDVWSPFVFGTNVPVAPFNFVGLSQD  
QTNGNVLLVKIDGKVRWKVGTTFVSGHYNLYVRCPAFITFGPQSTGIALGKNAVKYQLVQ  
RCTVGV

>GmLEA2-18

MSKDKVSGDPRRAVCTGITIFLLLAVTLLVWLWVYRPHKPRFTVIGAAVYDLNTTTTPLM  
STTVQFSVLIKPNRNRVSIYYDRFSAFVSYRNQAITPQVLLPPLHQEKRSSVSVSPVMGGTA  
LPVSVESDGLAVDEAYGLVGLRLIFEGVRWKAGAIKTAHYGLYVKCDVLMGLKKGLV  
GQVPLLGVTPCHVHL

>GmLEA2-19

MDVSTQNPVFSSKKCCFFLLIICMVVGLATFFMILIIRPHKPVFSVREVKINFYKIDNDSSNL  
TLLVSSVIYLLTNAENHNKFGIGFSSSRFLVYHEGLHIGTIRIPWFFQPPHSENVSVPSRVLL  
HSANLTKIIANTSLQEISKQNAQMRIIGDSRAHVWVLHIKLFEMIFAFSCDCESHLS

>GmLEA2-20

MSDPASKPNGNAAAATNGNPGPVKSQLYNPNRQVYRPQSHYHRRGQRSHRNFCFFFFFF  
WTILTLLAVALLAAIVGAALYVLYRPHRPEFSVTNLRIAKMNLTTSADSPSHLTLFNLTLIA  
KNPNNHLVFFYDPFSMTVFSNSVPVGNVSVAFTSDKNNQTSLRVLSGSQDLDTDSLTSL  
RSGLKMKRGFPVEIQMDTKVKMKMDWLKSKKVIRVTCDGIRGTVPSPGKSPAVASVVDS  
ECKVDLRIKIWKFSF

>GmLEA2-21

MEERVLLSPPPPPPLEKKHSTNKLELPDFNPGTYVVQVPKDQVYRVPPENARIAESHK  
KAPPKAAKTSRCLFCVLFHFFVLLILLGAVLGGFLSMMLLTPKDPQFSITRFKVVETKPHP  
KYDVTLEVHNLNSDVGVS YKNKGHVSLSLRRQEVASGAYPSFNQDAHDRTTFGVTLTSS  
KVGLPKEVEESVTNDKKKVNVTFS LAIHALARMKMGLLRSGTMKFDVTCNVKLDTLAK  
TTQVLSQQCETKRH

>GmLEA2-22

MSKITITSPKHCAGKEGLRIKKNYKKIYFTFSAFFTILLILLIWLILHPAKQFSLKEVDIY  
QLNLSGPNLNSSIQLTLLSKNPNQKVGIIYDEIQFYATYKGQQITGDTVPVPFYQGQEEENL  
ITASLVGNALPVAPSLGYELGRDQIVGRLVLNLKANGKLRWKVGTWVSGRYRFNVNCVAI  
NAFGPSIPAGPLTSKQGAQCSTTL

>GmLEA2-23

MKPNDNMTMLAKTDSEVSSLTQSSPARSPRRDVYYVQSPSRDSSHDGEKTTNSFHSSPLQ  
SPLGSPPHSHSNSSLGRHSRESASTRFSGSRKSSSSGNRKGWPWPWKDQFHAIEEEGLLD  
PNDNAHHGFPRRCYFPAFVVGFFVLFSAFSLILWGASRPQKPAISLKSITFDQFVIQAGAD  
MSGVATSLVSMNSSVKMTFRNTATFFGVHVTSTPVDLNYQLTVATGTMKPKFYQSRKSQR  
SVRVMVIGSHIPLYGGGANLNSVNGKPEPVLTL SVMVRSRAYVLGKLVKPKFKYKIECS  
IVMDPKKMGKAISLVKKCTYQ

>GmLEA2-24

MPMEGHADV SATFP PPPGHHGADTYIVQLPKDQVYRVPPRENALIVEQYRN PATAKKRRG  
GCCCCSRVFLTVALIVVAIVAVVGITLATLYFIFSPSGPKFTVSHVAVNRNKSSRAAPQYE  
VSLRARNPNEKLAIEYQDGDVSLFD DTKVAEGKFPTLEQGRGEASEVTVELTGSSGALP  
RRMNGGDAAVDLKLEMKLAIIRTAGLETWAMRSDVACEFKVSALGNDTRVLSQQCDTK  
FKQY

>GmLEA2-25

MAQSPDQQMKPLAPFISSTQFSRQEDQFQERTSEQKIIRIRK FVLCCGCFTALVVILVVILIV  
LSFTVYNVKEPEVRMNSVTLLSGTFANGGATNNVTLVADIFVKNTNAFTLRFSTSTIVYY  
DGVRIGEGTSPPGKAKARRTIRVNSTLEIMSKKLEIPTLNIDLRDQFLNISSYTRIDGKVKI  
LNIFPRKVVVEMNCTIGYNITTGSVTNGDNCLGAVDI

>GmLEA2-26

MAAGVSAPPPAPQAPRPKRPRPPSGRTNLASCVVATIFLIFIIIIVILIVYYTVFKPQDPKIAVN  
AVQLPSFSVANGTVNFTFSQYASVRNPNRAAFTHYDSSLQLIYSGSQVGFMPAGEIDAGR  
TQYMAATFSVQSFPLSVPPRMGPTLANGDGVGFNYGLRVEPTMEIESKLEMAGRKVLH  
FFTHHVYAKAGCRVAIAVTDGSVLGFHC

>GmLEA2-27

MHAKTDSEVTSLDASSSTRSPRRVYYVQSPSHDGEKTTTSLHSTPVLSPMGSPPHSHSSS  
SRFSASRHRNNHNKSWKIDVIEEGLLQSELDQRHSLRYYFLAFLLGFFLLFSLFSLI  
LWCASRPMKPKILIKSIKFDHLRVQAGSDSSGVATDMITMNSTVKFTYRNTGTFFGVHVTS  
TPFDLSYSDIVIATGNLKKFYQSRKSQRLVSVAVMGNKIPLYGGASLSSTGVPTLPVPLN  
LTFVIRSRAVVLGRLVKPKYYKRVQCSINLDPKKNVPIKLSKHSCTYD

>GmLEA2-28

MSDPASKPSGNGAAATNGNPGPVKSQLYNPNRQVYRPQSHYHRRGQRSHRNLCCECF  
WTILTLLAVALLAAIVGAALYVLYRPHRPEFSVTNLRIAKMNLTTADSPSHLTTLFNLTLLIA  
KNPNNHLVFFYDPFSVTVLSNSVPVGNQSVTAFTSDKNNQTSRAVLSGSQDLDTDSLTS  
RSGLKMKRGFPVEIQMDTKVKMKMDWLKSKKVGIRVTCDGIRGTVPSPGKTPAVASVVD  
ECKVDLRIKIWKFSF

>GmLEA2-29

MEERVSSSSLPSPSPPLEKNHNTDKLKLDPDLPDGTYYVQVPKDQVYRVPPPENAQIAESH  
KKSPPNKEAKTSRCLCCVLFHIFLVLAILLGAVLGGLFSMLLTPEDPKFSITSFKVVKP  
HPKYDVTLEVHNPNSDVGILYNGKGHVLSLRRQENIASGAYPTFRQSDSHDTTTFGLTTS  
SSKAGLPKEVEESVRNDKKKVSVTFLAIHALAHMKMGLLRSGTMKFDVTCKVKLDTLA  
KTTHVLSQQCETKRH

>GmLEA2-30

MSKITITSPKHCADKEGLKIKNYKKIYFTFSAFFITILLILVIWLILHPAKPQFSLKEVDIFQL  
NLSGPNLNSSIQLTLLSKNPNQKVGIIYDEIQLYATYKGGQITGDTVPVPPFYQGGQESNLIT  
ASLVGNALPVAPSLGYELGRDQIVGRLVLNLKANGKLRWKVGTWVSGRYSILSRIDYQEL  
LFHLCVYASIFGIHCYMHILKLPVEYFVLNHLSEY

>GmLEA2-31

MSRHINPIGSQFFLRTPALFFPHKQVCKGNNLYPHYPKSEKMATRGLKICLAVSSLFLIIL  
AIVIVTLILTIFKPNPDIFLHPVDLENFQLLSPNTTSAPLGIVITIVNPNYGNFKYVNSSGYL  
KYRDTIAEVPLGIRSFARSTTNVSTTVGIMTDKLIQDPKFLSDIEGGVFNLTAEATLPGKV  
TMIKILRLKAKIYISCGVSFNIIAVDASSSCMSKIKL

>GmLEA2-32

MTDRVHPSAKTTANAGPKPTFPATKSQLSGANRPTYRPQPQHRRRRSRGCASTLCCWLL  
LILLFLLLLVGAAGTVLYFLYRQRPFTSVTSLKLSFNLTTPSTINAKFDLTLSTTNPNDKII  
FSYDPTSVSLLYGDTAVASTTIPSFLHRQRNTTVLQAYVTSTEEVVDSDAAMELKRSMKRK  
SQLVALKVELETKVEAQMGMVFQTPRVGIKVLCDGVAVSLPDDEKPATASAENTACQVDVR  
FKVWKWTVG

>GmLEA2-33

MQIQHQEDHNHNP NHILRPNPNPNPNPTQYTHYRFP GKVP HHQH QVHNMDKGAASRFK  
PNAPKREHCICITV FLLLLGIILLV LWLAYHPTKPRFTVASA AVYGLNATSPPLMSIAMQFN  
MVIRNPNRRV SISFDRLSAYVSYRNQP VTPHVMLPPLFIEKHS AVSLSPEIGGV PVPVSE DV  
SNGLAMDENYGVVGVKLV LFGRLRW RAGDINSAHYGLYVKCDVLMGLRKG FVGVQVPL  
LGAPVCDVNT

>GmLEA2-34

MAHAKTDS DVTSM DTS SSSPKRAVYYVQSPSRD SHDGD KSSTATHATPACNSPVDSPSHHS  
YGHHSRASSSSRVSGGSYNIASWGRKVTRKNKLGWPHECKVIEEEEEEGYYGERQGF SRK  
TQIFVGV LGFAFIFTLFCFIIAAAARPNVRISVKSFTVHNFLFGEGSDMTGVP TKMLTVNC  
SARMTVHN PATFFGIHVSSKAVNLMYSEMTVATGELKKHYLSRKSTRTVSVNLQGSKVSL  
YGADASLTGLVDNGKIPMTLVFEVGS LGNIVGRLVRSKHRRRVSCSVAIDSHNIEPIK LKEN  
ACTYN

>GmLEA2-35

MTGKDEFIRLTRIRLNRIGIRTNPRPILDLSFSITVKVHN R DFFSLTYDTLAVSVGYRGRQLG  
FVTGGGGGRIRARGSSYVDATLTIDGFEVIYDAFYLLEDIAKGVIPFDTDTRVEGKLGLFFF  
TVPLKATV SCEVYVNINQQTIVRQDCYPKIFCSLTIMQ

>GmLEA2-36

MHAKTDSEVTSLAASSPTRSPRRPLYVYVQSPSRD SHDGEKTATTSFHSTPVLSPSASPPHS  
RHSSSTRFSKKDHSLSLKPWKQIDVIEEGLLQGD DHHNGLPRRCYFLAFVVGFLV LFSFF  
SLILWGASRPMKPKINIKSIKFDHVRVQAGSDATGVATDMITLNSTLKFAYRNTGTFFGVH  
VTSTPVELSYSDIVIASGNMKKFYQSRRSQRLVSVAVMGNKIPLYGSGASLSSTTGVP TVP  
VLLNLNFVLR SRAYVLGKLVKPKYYKTIQCSITLDPKK  
LNAAISLKK SCTYD

>GmLEA2-37

MCCRNRFIACTCCIIITLFFMFIISIIVCISPSSVKFHVTDASLTQFNLT SNNTLYYNLKV NVT  
VRNPNKHTIVYYRRITVISWYKDN AFGWVSLTPFDQGHKNTTFLQAVFEGQRVIK LKSKQ  
LGEYKDETSVGIYKDLAVDFDLRIRAKY GKFKSSRFNTPIVQCRRLRVPLISNGKSV PPFV  
TRCKSASFFSDRDAPDVDG

>GmLEA2-38

MCCRNRFIACTCCIIITLFFMFIISIILFWIIISPSNVKFHVTDASLT EFNLT SNNTLYYNLKV N  
VTVRNPNNKIVVYYRRIKAI AWYKDNDFGWVSLTPFDQGHKNTTFLQAVFEGQRVIK LK  
KQLGEYKDETSVGIYEDLAVDFDLRIKANFRGFKSSRFDPV VQCRRLKVPLISNGKTAPP  
FSVTKCKIDGSFFADRDSQAEAR

>GmLEA2-39

MCFRSRCSFCYIFFTIYTLMLMFILSIILFWIIISPSNVKFHVTDASLTQFNLT SNNTLYYNFK  
VNVTMRNPNNNIIVYYRRIT AISWYKDNAFGWVSLTPFDQGHKNTTFLQAVFEGQRVIK L  
KSKQLGEYKDETSVGIYKDLAVDFDLRIRAKYAKFKSSRFNTPIVQCRRLRVPLISNGKSV P  
PFSVTRCKSAYFFSDRDAADG

>GmLEA2-40

MAQSPDQ QMKPLAPFVSSTSHFSRQEDHDQFQDTSEQKIIRIRK FVLCCGCFTALV VILVV  
VLIVLGFTVYNVKEPEVSMNSVTLVSGTFANSGATNNVTLLADISVKNTNAFTLRF GKTTT  
IVYYGGMGIGEGTSPPGKAKARRTIRVNSTLEIMAKLLDIPTLNIDL RDQSLNISSYTRIDG  
KVKILNMFPRKVVVELNCTIGYNITTGLVTNGDNCLGTVDI



>GmLEA2-41

MAAGAAPVPAPRPKRPRPPSGRTNLASCVVATIFLIFIVILIVYYTIFKPQDPKIAVNAVQL  
PSFSVANGTVNFTFSQYASVRNPNRAAFSHYDSSLQLIYSGSQVGFMPAGEIDAGRTQY  
MAATFSVQSFPLSAPPRMGPTLANGDGVGFNYGLRVEPTLEIESKLEMAGRKVLHFFTH  
HVYAKAGCRVAIAVTDGSVLGFHC

>GmLEA2-42

MNTRAGANSESQPQPSRRQQHLHYASSPTTSSHSSCCCLFLLFSFFALLVLAALLVIVLAI  
KPKSPHLDLRQVGLQYMALVPNPTPRGPSTAKLYLVIRLVAVVNPNEVGIRCGESRVTVV  
YRDTPLGRTSLPafcQRAHTVKEVVATMAVDDVNLsnADGADFARDALLNDRVELRVLA  
HVATKIRLFNLSPPLQVSVNCVIVISPRKQSLTYKQCGFEGLN

>GmLEA2-43

MEGHADHNSAVLPPPGRHAPAAGTYIVQFPKDQYVRVPPRENALIVEQYRNPATAKKRR  
GGCCCCNRRVLITFALVVTIVAVVGITLATLYFIFSPAGPKFTVSHVAVNRNKNKSQGAA  
AQYEVSLRARNPNEKLAIQYQEGDVSLLLFDESKVAEGKFPTLEQGGGEASEVKLELTGS  
SGAFPRGMHGGDAAVDLKLEIKLAIRIRTAGLETWGMSSNVACQFKVSGLGNDTRILSQQ  
CDTKFKQY

>GmLEA2-44

MTTPRGNHHPQPNGERRRQWPPPQPAAPEAAAAPTAVAANYNGYRQYHPTTPARSSSS  
ASFKGCCCLFLLFSFLALLVLAVVLVILAVKPKKPQFDLEQVGVQYMGITPNPSTASLSL  
TIRLLFAATNPNKVGIryGQSSFTVMYRGIPLGKATVPGFFQPHSTRQVIATIAVDRVNLL  
QADAADLIRDASLNDRVDLRVLGDVAAKIRVINFDSPAVQVSVDCAIVISPRKQSLTYKQC  
GFDGLTV

>GmLEA2-45

MKKGFSGCKGSIMCLVVALCVAIALVLLGVILALTVFKPRHPITNVDSVRLQNMSLAMDIFS  
MSVNVNLTLEVDVSVNNPNKLGfNYNSFAQLNYKGQLIGEAPIPNDILAEIKGLNLTL  
IVMADRLVSNVTKDVALGSLPLNTLVRIFCQVNIlgFMKFYVASTSSPKIPHFLDFKNLY  
KGAKLSPFTSI

>GmLEA2-46

MHAKTDSEVTSlaASSPTRSPPRRPLYVQSPSRDShdGektattsfHSTPVLSPSAPPHS  
RHSSSTRFSKkdHSHSLKPWKQIDVIEEGLLQGDrrnglPrRcyFlafVVGFLVLSFF  
SLILWgASRPmkPKITIRSITFDHVRVQAGSDATGvatDmitLNLSTLKfTYRNTGTFFGVHV  
TSTPVELSYSDIVIAAGNLKkfyQRrsQRLLSVsVMGNKIPLYGSGASLSTTGVPPLPVP  
LNLsfVLRSRAYVLGKLVKPKYYKTIKCSITLDPKKNAAISLkKsCTYD

>GmLEA2-47

MIGKDEFVSYSPLSPNPNPNPNPNPNPNPNPYPNPNPYYPNPNHPYPQNvvvllPSYRPHF  
QRrrRRCIIySAALFLFLVAGAAFLlyPSDPEIRLARIRLDRIgIRtnPrPILDLSfSLTVKVR  
NRDFfSLsYDSLTVSVgYRGRQLGFVTAGGGsIRARGSSyVdatLTIDGFeviYDAfyLLE  
DIAKGvIPFDTDTRVEGKLGLFFFTVPLKATVsCEVDvNINQQTIVRQDCyPKSLGDPDES  
AYIEAGDT

>GmLEA2-48

MAHAKTDSDVtSMDTSSSPKRAVYYVQSPSRDShdGKsStathatPacNSpVDSpSHS  
YVHHSrASSSRVsAGSYNNIASYWGRNNKGTRKNKLGSwthDQcKVIQEeEGYYGERE  
GFSRRKTQIFVGILAFaFIFTLFCFIAGVARPHKVRISVKSfTVHNfLFGEGLDLTGVPTKM  
LTVnCSVRMTvHNpATfFGIhVSSKAVNLMySEMtVatGELNKHYLPrKSTRIVSLNLQGS

KVSLYGAGASLIGLVDNGKIPMTLVFDVRSRGNIVGKLVMSKHRRRVSCSVAIDSHNIKPIK  
LKENACTYN

>GmLEA2-49

MPSHDHVAERQHHRPIRRRLVNTTHSGKTHPLIWLAAILCTHIAIGVVIAGIVVFGYMYVIH  
PRIPVMSITNAHLDLLSNDYAGLLQTQLTIIVVAQNGNAKAHATFSDIRFNLSYQGQRIALM  
RAPPFDVPKNSSKSLNYVVRASIPLTQQMEEVDESWKRDVIGFDLKG SARTRWRVGPL  
GSVKFWCNLECQLKFHPSNGSYIHHSRCTS KSK

>GmLEA2-50

MSHLNGAYYGPAVPPPKSYHRPSHGGGGRDGCCCGCLSCFCGCIFDCILGLICKILTTHIILA  
VLAFLFWFIVRPNVIKFHVTDASLTRFDYTTNNTLHYDLTLNVSIRNPNRRVGVYYDQIEA  
LALYEDVLFGNLTLSFYQHHKNTTFVSPIFKGQRVTPAKVQVSEFDKEKSGSVYTIDLK  
LFMTVRFKFLLFKSGSLKPKIRCALHVPLKSRNATTSPDAAFQPTCEDWDY GKKWWIH

>GmLEA2-51

MADKQSQLNGAYYGPAIPPELPRHHHRGRRCCCCLFSFFWKLLLAIVVFLVVFVFWA  
VVQPRTFKLHVTD AKLTQFNLTNNNNINMLRYNLVNLNTARNPNKKNLYYDQVEGH  
VSYEGMRFASADLITWRNSFRQYTKSTNNMSGVFTGQHGLVFDGDHV KDFEKDERGGV  
FDIDVKLYFNIRFLGDFIGSSSRVRAKCELQVPLVSRGVFLPTRCHVKF

>GmLEA2-52

MSVKECEHHKGGKRRKIFRQVFWCLVFLFIVLV TILLIWAILRPTKPTFTLQDVTVYAFNAT  
VANFLTSNFQVTLISRNPNDRIGVYYDRLETFTYRSQQV TYRTAIPPTYQGHKEINVWSPF  
VYGTNIPVAPFNFLGLSQDQSNGNVLV TIRAEGRVRWKVGT FISGRYHLYVRCPAFISFGPR  
SNGIVVGENAIKFQIIQRCSVSV

>GmLEA2-53

MADHQRLRIHPMEGEAPPPPTPLVPPGSSRSEKGVPLHHPPLPRAMPAAYPTPHKRSSSC  
CCKCICWTIILVLLLIIFAASVGILYLVFQPKLPDYSVDTLRISDLRLNFDMSLYAKFDVKIT  
ATNPNKKIGIYYEKGGKLSVWYTNTLCEGSLPQFYQGHENKTVLNVSLSGVQVQSGSTL  
MNALQQQQQTGRIPDLKVHAPIAIKLGRLKLMKVRVLGECLLVVDSLSSNNLISIKASNC  
KFRLKL

>GmLEA2-54

MHNNDHIPVHHVQGSNPKPVKLNRRHHTMRYVYVHRVHESLTTRVSKMICATFLGLLFIVGL  
ITFILWLSLRPHRPRFHIQEFNLPGLTQNSGFENAVITFKVSARNSNQIGVYYESMDGAVY  
YRDQKIGSKPLLYPFYQQPKNTTEVDGDLGATLTVSSQRWSEFQSDRADGSVVFRELETS  
VIRFKISTWDSKRHTMHANCNVGVGPDGSLTLYKDKRCPVYFS

>GmLEA2-55

MCEGKSlyIWPLKVIgLLGLIVLCLWLALRPKNPSYSIMFISIQHPSNSSENCTIFYSLQIENP  
NKDSSIYYDKTILSFLYGEPEDEVGETTIVPFHQGTGNTRDVSDTVNAKPRPFKPLFSAISN  
ATELKVAlITRYRYKTWGIKSKFHGLQLKGILPIDSDGKLSRKKKKYPLSRNSNKLGRFKI  
RH

>GmLEA2-56

MTTEEVITMFPsrKEEKQSSSKCLVYALVVLVAILFIWLVFASIVLRVDPQIQLKSARLMH  
NTKNHSFSSTSSLNVTMIARVSLTNPNLFRFYFGNSRVSVLYGASIVGAWELEGARLEGR  
ETKEIDFMVHMRfSTKLLVIMRNLTNDTAHSDSAGMLKLSYAKLSGTVHVLMVNMVKKK  
TLGMACIMNLNLTSYSTQHFQC

>GmLEA2-57

MAKSIEQEGRSQKCFVYFLGAFVILCALVLFASILRLKNPYLKLRSATFNQIRYSASPSPSF  
NATLIIFLALNNPTFGAFTYENNSLSVLYAGLKIAHSQINGGRVSRQTKEIHVTVKFMSAID  
ITSGSLNLTNTNVFFSGKVHLFKIINIRKTIEMPCSMNLNFTSHATQAIQCQ

>GmLEA2-58

MGGRMHTKSDSEVTNSNSMEQSSPSRSPRRPLYVQSPSNHDVEKMSYGSSPMGSPHHF  
HYLSSPIHHSRESSTSRFSASLKNPRSNFSSSSWKKLHPHPNPDAGLDDDDDDDDGDD  
DLNHFPRLRLRYFCFFLLFLLFFTLFSLILWGTSKSYKPRIIVKSIVFENLNVQSGNDGTGVP  
TDMLSLNSTVRILYRNPATFFGVHVTSTPLHLSYYQLAIASGQMOKFYQSRKSQRKLAVV  
VLGHQIPLYGGVSVLGNTKEHLENVALPLKLTFFVRSRAFILGRLVKSKFYRRITCSVTLH  
GNKLGKHLNLTDSVCYK

>GmLEA2-59

MSVKECGHHSSQRRNLLRLILGATAAFVLLILLTIFLIWVILRPTKPRFTLQDATLYAFNLST  
PTPNTLTLTMQVTLSSHNPARNRVGVYHALHVYASYRSQQISLATALPDYQGHRDFAVW  
SPFLFGNVVPSFVLSLQDQSAAGAVLVNVKVNGRVKWKVGSWVSGRYHIYVNCPA  
YISFAGDRSIAAGGLVASPVKFRLLQSCSVDV

>GmLEA2-60

MDNKKSKWSWSSAIIGAASAVAASALISAKPKDPTFHLISINFTSLKLNFPLLDAEVLLTVH  
VTNPNIAPIHYSSTSMSIFYQGSLLGSAQVQAGSQPPRSCQLLRLPARLHALELAHHATRFL  
HDVARREMFLDAAVDIAGTARVMWWDHNFKVHVDSHVTVDPVFLDVIDQENTSELEVF  
TAAALGSEQ

>GmLEA2-61

MEEGKSKSTLAKNPSRSRNPSSRRVALDVSPRHMGSTLSGIHSSIDHLDKGRYHPCCFACC  
AWSCLIVFILIIAILFLGITYLAFLKSGMPKINVRAFNTKFQVDDGSQKMNSVIGLGLIFSN  
KNDKLLKLYGPLDVDVTSSEVLLGKKKQGGFSQKPLNVTNLDMTMTLENADVDKYAAE  
ELKSDIKAYEMVFDLYVGGHIGFQVGKLMNVPFLASCNQIKREDVDFGRKPECEVKLF  
AARPSTN

>GmLEA2-62

MMAAEHQRIHPVHDVEAQHRPLVPQNIAKSDDKGIHRTFPVMHSPKRRRSCCCRFM  
CWTLSELLILIIAIAITIGILYLVFRPKLPKYSVDQLRISQFNVSDNNTLYATFNVAITARNPK  
KIGIYYEGGSHISAWYMETQLCEGSLPKFYQGHRNTTVLDLPLTGQAHDANGLVNRIQEQ  
LQQTNNVPLNLKVNQPVRVKLGKLLFKVKFRVRCKLEVDNILGASNDIRISRSSCKFRLR  
L

>GmLEA2-63

MGGRMHTKSDSEVTNSNSMEQSSPARSPRRPLYVQSPSNHDVEKMSYGSSPMGSPHHH  
FHYYLSSPIHHSRESSTSRFSASLKNPRNFSSSSWKKLHPHPNRDVPDDHDDADHHLKQ  
SSRNRLRYLWFFLLFLLLLTLFSFILWAASKTYKPRIIVKVTCPNGIVIYCSLCDLIFGFCYGG  
GQSIVLENLYVQSGNDGTGVPDMLSLNSTVRILYRNPATFFGVHVTSTPLLSYYQLAIAS  
GQMOKFYQSRKSRRSLAVVSGHQIPLYGGVSVLGNTKEHLESVALPLNLTFFVRSRAFIL  
GRLVKSKFFRRIRCSVTLHGKLGKHLNLTDSVCYK

>GmLEA2-64

MSVKECGHHSSQRRNLLRLILGAIAAFVLLILLVIFLIWVILRPTKPHFTLQDATLYAFNLST  
PTPNTLTLTMQVTLSSHNPARNRIGVYHALRVYASYRSQQISLATALPDYQGHRDFAVWS  
PFLFGNVVPSFVLTSLQDQSAAGAVVVNVKVNGRVKWKVGSWVSGRYHIYVNCPAY  
ISFAGDRSNVAGVVASPVKFRLLQSCSVDV

>GmLEA2-65

MSTKECCHHDEERRQLPRRVFAAILGFILLILLVIFLIWIILRPTKPRFILQDATVYAFNLSSG  
DTPSPITPTNTLTLTMQVTLAAFPNHRIGVYYTKLDAYAAYRGQQVSVATSLPATYQGH  
RDTSVWSPYLYATAVPVSPFTLQILQQDKTSGGILVNVKVNGRVKWVGTWVSGIYHINV  
NCPAYLRLAGDRDDAIGFAGPAVKFQLFQTCIVDV

>GmLEA2-66

MANRGLKICLAVSLLFLVIVTIMIVTLFMTIFKPKNPEITVHPVGLEDFQFSLSPNLTINVTL  
GMIITIRNPNYGSFEYKNSTGYVNFHDTVVAEVPPIEAELVPARGQINVNTSADFMVEKLN  
DPNFLSDVLGGTLNFTSTTALPGKARMFNIIKLKATSYSSCDISVNISSRKVDTCNYKIKL

>GmLEA2-67

MTSEAYVPKRYESLENPFAHKPRKRSHQSGGLCGCLRKENKVYSDVVIVVKADNQNEDI  
GLDYLDNEVGIMYLGSQLSSGQIPPFLQPGKNTTKVNVELKGENEFGEKGIPLLITVKLPI  
RLVIKDLIHLRKVVVNVNCSVVIDKLEANKSPKILDKVFTYGIDF

>GmLEA2-68

MRPTPTPDNLNCIPRIKVGSGKGRKVCLTVTGVVIAIVLLIVILALTVFKAKHPVTIVDSTK  
LEDFHVS LDPVKLRVDLNVTLGVDVSVKNPNKVGFQYSDSA AHLN YRGQLIGEV PISAGE  
ISSGETKGFNLTHTIMADRLLSNSQLSDVTSGLPLSTFVRMSGKVSILGFIKVHVVSSTS  
CDVAINLSNGTVGNQECQYKTKL

>GmLEA2-69

MAHPPTQSQSRAANKPKRSNLLRCIAIFILALILVGIIVIIIWLVLKPKRLEYTVENAAIHNF  
NLTDANHLYANFDFTIRSYNPNRSVSIYYDTVEVSVRYEDQTLATNAVQPPFQSHKNVTRL  
HVGLTAQTVALYDSVPKDLRLERSSGDIELDVWMRARIRFKVGVWWSKHRVLKIFCSPVL  
VHFSKKGKSFERAPCDVEL

>GmLEA2-70

MTSEAYVPKRYESLENPFAHKPPRKRSGFCGCLRCCCCCFSCRCCICTIFIHILLVGI  
GLALFYFIKPKVPSYDIEHINVKSFDIRKESKVYTDVVIVVKADNPNEEIGLDYLENEVGIM  
YVGSQ LSSGQIPPFLQPGKNTT TTVTVELKGENEFVEMQNHFMEDQEKGNIPLLITVKLPI  
RIVINDLIHLRKVVVNLNCSVVIDKLEVNKSPKILDKVFSYGIEF

>GmLEA2-71

MANKGLKFCCLIVSLLFLIIVTIVIVTLFFTVFKPKDPNITVHPIGLEHFDLFPNITANVSLG  
MVITIENPNYGSFEFTNSIGYINFHDTVVEVPIGAELVPAHGQINVNTWANFMVAKLISVP  
KFWSDVLSGTLNFTSTSSLPGIARMFKIFKLKATAYSSCNISLRIVPRNVDTKCISKIKL

>GmLEA2-72

MASRGLKICLAVSLLLLIIFTIAIVTLFMTIFKPKNPEITVHPVGLEDFQSSFSPLNLTINVTLG  
MIITIRNPNYGSFQYINSTSYVKFHDTVVAEVPPIEAELVPARSQINVNTSADFMVAKLINDP  
NFLSDVLGGTLNFTSTIALPGKARMLNIIKLKATSYSTCDISVNISSRNVDTCNCKSKIKL

>GmLEA2-73

MINPTKAMPVSHSFLSLADSTDTHRFTIMQDPSRPAPPPFYHQNGGQPPPPAASAAIATGYP  
YAAQQQYYNTTYPPRSYASRSFFRAFFATMICLAVVFGVVLITWLVRPSLPHFTLHSL  
VSNLSSTSQSLSATWHLVFLVRNGNKKMTVSYNALRSSIFRQNYISESQLAPFRQDTRSQ  
TTLNATLTAAGTYLEPKLIDNLNAERNASSVLFVQVVAATSFRRSGSWRFRTRVLKVLCKR  
VPVGVSSKSSSGDLVGGDRECQVWT

>GmLEA2-74

MSTKDCGNHDEKNRQFLRCLFAAILGSILLIIFLIWIILRPTKPLFILQDATVYAFNLSSSGPT

PSPINPTPNTLTLTLQVTLASFNPVHRIGVIYTKLDTYSAYRGQQLSIATSLPATYQGHRETA  
VWSPYLYASAVPVSSFTLQILQQDRTSGGILVNVKVSGRVKWKVGTWVSGNYHINVNCPA  
YLRVASDRDDAVGFAGPAIKFQLSQSCIVDV

>GmLEA2-75

MTDRVYPSAKPAAVNGAAANPSFPATKAQLYGATRPTYRPQPHHRRRSKRRCCCTFFFWL  
ILTVLILLLLIGVGGTVFYLLYRPHHPTFTVTSLKLSYLNLTSSSNTLNSRFDITVSATNPNKK  
ILFAYDPTSITILSADIDLGDGTVPFGFQHPKKNNTTLIKGSILSSGQALQSDEASRLKSSMKSK  
NGLPLKVNLETKVKAKMGNLTKPKVGIRVSCDGIRVSLPSGKKPATASTSNACDVDVRF  
KIWKWTV

>GmLEA2-76

MTLSAKSESDITSLAPSSPSRSPKRPVYVYVQSPSRDSDHDGDKSSSMQATPISNSPMESPHPS  
FGRHSRNSSASRFSGIFRSSSGRKGSRKRNDKGWPECDVILEEGSYHEFQDKGFMKALPG  
LDYLCGCLRCVLFDFHLPYKAQIAVKSILTVDHNFYVGEESDFTSVPTKMLTVNGTLRMSIY  
NPATLFGIHHVSTPINLVFSDITVATGELKKHYQPRKSHRIISVNLEGTKVPLYGAGSTITVS  
QTGVEVGLTLNFEIRSHGNVVGKLVKTRHRKEITCPL  
VLNSSRSKPYQIQKEFMHL

>GmLEA2-77

MRFSKASFYTLRLKPHNHHHQNYYVLSRRRVVTLAVGVLILLSALYIFWPSGPDVKIVGL  
KLRRIKVHPVPPITIDISMLLTLRVHNVVDVYFMDFGAVNVAVAYRGKMLGHVTSRRMHVR  
ARGSSYVDADVEFAGISVLPVLLEDVARGIVPFDTISHAKGQLGLLFFHFPIKAKLSCE  
VVVSIINQTIQRQHCLHE

>GmLEA2-78

MLASVEEELGTPKQPRNQHSQQSEAPNSLANTRAIFGQPRLQRTKPIIWCAAILCFIFSLVLI  
FFGIATLILYLSMKPRNPTFDIPNASLNVVYFDSPOYLNGEFTLLANFSNPNRRIGLRFESLN  
IELFYSDRLVSSQTIKPTQRPRETRLQSVNLISLVLFPQDVGKLVQRQVENNRVNYNARG  
TFKVRFNIGLVHLSYSLYSTCQIEMTSPAGILVARQCITNR

>GmLEA2-79

MSTSDKPEVVERGSKDEKHKEDDQEEGKGGFIEKVKDFIHDIGEKEIEEAIGFGKPTADVTA  
IHIPSINLHKADLVVDVLIKNPNVPIPLIDIDYLVDSERKLVSGLIPDAGTIGAHGEQTVKI  
PVTLYDDIKQTYADIKPGSIIPYRVKVSILFDVPILGRRLTLPLEKTGEIPIPKPIDLEKIHFE  
RFSFEETIATLHLKLENKNDFDLGLNALDYEVWLGDVSIKGAELTKSAKIEKSGISYIDIPIT  
FRPKDFGSALWDMIRGRGTGYTMKGHIDVDTFPGAMKLPISKEGGTTRLKCKKEDRDYD  
DDDDDED

>GmLEA2-80

MADRVHPSHSPSVSADSQPPSPQDSSVVPKPPSPSPEKPVPPPPTYVVIKPKDQVYRVPPPE  
NARRYDQYARRKHRRSRCCCCFCWLIGILFILVLLAIAAGVLYLVFRPEAPKYSIENTVR  
GINLTSPSSVAAISPEFNVTVKADNPNDKIGIRYLKDSAEVFYKDARLCNGALPAFYQPSN  
NVTVFGTALRGDIELRSEDRRALLEAQTKRRVPLTVRIRAPVKIKVGSIRTWKITVKVNC  
DVTVNELTAQAKIVSKRCSYDVDLW

>GmLEA2-81

MVALCVAIALVLLRVILALTVEFKPRHPITNVDSIRLQNMSLGMDMFSMSVNVNFTLEVDVL  
VNNPNKLGFNYYNSSAQLNYRTQLIGEAPIPNGDILVEEIKGLNLTVMADRLVSNSKVT  
KDVALGSLPLNTLVRIFCQVNVLGFMKFYVASTSYQKFPISSSSRICTKEQSCPHSLQYSKRI  
TK

>GmLEA2-82

MADPQKIHPVHHDVEAQNHPSAPLVPRSMSKSDAGDPQRVVVVVQQQQQQQQHIPPVKH  
TKPPTKKRRSCCCRFWCWLISILLILIVAIGITIGILYLVFRPKLPKYSVDELKVTNFDLADNN  
SLSVTFNLTITARNPNKIGIDYRGGSHISAWYMDTKLCEGSLPKFYQGHRNTTILSIPLTG  
KTQDATGLQNTLQNLQETGNVPLNLRVKQPVRIKLGKLGKLFKIKFRVRCRIVVDSLSAN  
SSIRIQSSSCKFRFRL

>GmLEA2-83

MMLSAKSESDITSLAPSSPSRSPKRPVYYYVQSPSRDSDHDGDKSSSMQATPISNSPMESPSHP  
SFGRRHSRNSSASRFSGIFRSSSGRKGSRKRNDKGWPECDVILEEGSYHEFQDKGFTRRFQA  
LIAVLTFVVVFTVFCLIIWGASRPYKAEIAVKSILTVHNFYVGEESDFTGVLTMLTVNGTLR  
MSIYNPATFFGIHVHSTPINLVFSEITVATGELKKHYQPRKSHRIVSVNLEGTKVPLYGAGST  
ITVSQTGVEVPLTLNFEIRSRGNVVGKLVKTRHRKEITCPLVLNSSRSKPIKFKKNSCTYD

>GmLEA2-84

MTDRVYPSAKPAVVNGGAANPSFPATKAQLYGATRPTYPQPHHRRRSRRRCCTFFFWL  
ILTVLILLLLIGVAGTVFYLLYRPHPTFTVTSKLSYLNLTSSSNTLNSRFDITVSATNPNKK  
ILFAYDPTSITILSGDIDVGDGTVPGFQHPKKNNTLIKASILSSGHALQSDEASRLKSSMKSK  
NGLPLKVNLETKVKAKMGNLKTpkvgirVSCDGIRVTLPSGKKPATASTNAKCDVDVRF  
KIWKWTI

>GmLEA2-85

MTTPRGNHHPQPNGERRRQWPPAHPAAAAAAPEAAETATATAAGGHSYNGYRQYHPRT  
PGRSSSSSASFKGCCCLFLLFSFLALLVLAVVLVIIIKPKKPKQFDLEQVGVQYMGITPN  
PPSTASLSLTIRLLFAATNPNKVGIRYQSSFTVMYRGIPLGKATVPGFFQPHSTRQVIATIA  
VDRVNLQADAADLIRDASLSRVDLRLVLDVAAKIRVINFDSPGVQVSDCAIVISPRKQ  
SLTYKQCGFDGLTV

>GmLEA2-86

MAHPPSQSNSTAANKPKRSNLLHYIAMFIVALIILVGIIVIIIWLVLPKRLEYSVENAAIHN  
FNLT DANHLYANFDFTIRSYNPNRSISIIYDTVEVSVRYEDQTLATNAVQPPFQSHKNVTRL  
HVALTAQSVALYESVPKDLRLERSSGDIELDVWVRARIRFKVGAWKSRHRVLRIFCSPVLV  
HFSKGKSFERAPCEVEL

>GmLEA2-87

MLETEQARPLAPSIERQSSDEDNTTPHPQTQGHKKLIKRCACPLISLLLIAIVIIVLIFTVFRV  
KDPVITMNSIKITKLQLVNTMSQQPGANMSLVADVSVKNPNVASFRYSNTTTSLYYHGVIV  
GEARGPPGRAKARRTLRMNVTIDVITARVISSPDFVTDLGSGLLTMSSFSRVPGQVKILNLI  
KRHVVVKMNCTTTFNISTQAIKEQSCRRKVKL

>GmLEA2-88

MSQLLDKAKNFVSEKVNDMAKPEASVTDVDFKRVSKDNVEYLAKVSVRNPYSTSIPICEI  
NYSFKSASREIASGKIPDPGSLKAKDTTMVDVPVKVPYSILMSLAKDIGADWDIDYQLDL  
GLVIDVPVIGIFTIPLSQGGEIKLPTLSTMFA

>GmLEA2-89

MKVGSGKGRKVCLSLTGVVIAIVLLIVILALTVFKAKHPVTTVDSTKLEDFHMGLDTPKLR  
VDLNVTLHVDVSVKNPNKVGFKYSDSTAHLNRYGQLIGEVPPIPAGEISSGETKGFNLTLTI  
MADRLLSNSQLLSDVASGTLPLNTFVMMSGKVSILGFIKVHVVSSTSCNVPINLSNGTVGN  
QECQYKTKL

>GmLEA2-90

MKPNDNMAMLAKT DSEVSSLTQSSPTRSPRAVYYVQSPSRDSSHDGEKTTNSFHSSPLQ  
SPLGSPPHSHSNSSLGHHSRESASTRFSGSRKSSSSGNNRKGPWRPWKDQFHAIEEEGLID  
AHDNARGFPRCCYFPAFVIGFVLLFSAFSLILW GASRPQKPAISLKSITFDQFVIQAGADMS  
GVATSLVSMNSSVKMTFRNTATFFGVHVTSTPVDLNYQLTLATGTMPKFYQSRKSQRSV  
RVMVIGSHIPLYGGGANLNSVNGKPVPEVPLTSLVMVRSRAYVLGKLVKPKFYKKIECSIV  
MDPKKMGKAISLVKKCTYQ

>GmLEA2-91

MMAADQQRHVPVDVEAPHRLVPENYAKSDKGIPQRTFPVMHSPKRRRSCCCRFMC  
WTLSILLILIIAIAITIGILYLFRPKLPKYSVDQLRISQFNVDNNTLYATFNVAITARNPNKKI  
GIYYEGGSHISAWYMDTKLCEGSLPKFYQGHRNTTVLDLPLTGQAPDASGLVNRIQEQLQ  
QTNNVPLNLKVNQPVRVKFGKLLKFKVKFRVRCRLEVDNFGASNDIRISSSSCKFKLRL

>GmLEA2-92

MLTLPPPPRLLTTRQTKQVSPDQIVISKLPKQHSQESDAPNYVTTKSIRPPPPPPPPILR  
QPPFQRTNPIIWFAAVLCLIFSLLLIFFGVVTLIIFLGIKPRNPYFDIPNANLNAVYFDSPEYFN  
GDFTLVANITNPNKKIDVRFESFDVELFFSDRIISTQSIPTQRRRESRLES LHFISLVFLPK  
DLGVNLKGQVQGNRVKYNVRGTFFKVRVSMGFFHLSYWLHSRCQIEMTGPPTGVLVARK  
CITKR

>GmLEA2-93

MSQLAPKQFMTESSQSNQDHEQVVVISQKKLRRRVCVMVTGAVLLLLLIVLIVAILAFTL  
FKTKEPRTQLVSATLEGIAPRLTLPALDLQINVTLDLKVVRVENRNRASLKHEGGKSVLLYKG  
KEVGDAYINPGLIPSRGSTILPCRLTLQVEKLANLTSLVGDLMGGEISMDTVTRIPGKVTF  
LGFIKKHIVAESNCQFTISVSELKITNQTCKSKAKL

>GmLEA2-94

MKKGSGCKGSIVCLMVTLCVVIALVLLGVILAMTVFKPRHPITNVDVRLQNMSLDMDIF  
SMSVNVNLTLEVDVSVNPNKLGFNYYNSYAQLNYRGQLIGEAPIPNGHILAEIKGLNST  
LTMADRLVSNSEVTKDVALGLLPLNSLVRIFGQVNVLGFIFYVASTSSCDFTLNLSNRTI  
VDNKCQEKTKISG

>GmLEA2-95

MRVGLGVKVS LGVIGVSLIFAVLKMSQLLDKAKNYVAEKVTNMPKPEASVTDVDFKRVS  
RDSVEYLAKVSVSNPYSTPIPIKEIKYSLKSAGKEIASGTIPDPGSLKASDTTMLDVPVKVP  
HSILLSLAKDIGADWDIDYQLDLGLVIDLPVIGNFTIPLSQKGEIKLPTLSDMFA

>GmLEA2-96

MSQLNGAYYGPSIPPKTSYHRPGRGGGCCGCLFSLIFKLILT VIII VGIAGFVFWLIVRPN  
VVKFHVTDATLTQFNNTANNTLHYDLALNITVRNPNKRLGIYYDRIEARAMFHDARFDSQ  
FPEPFYQGHKSTKVLNPVFKGQV VPLNAEQSAELKKENATGVYEIDVKMYLRVRFKLG  
VLKTKTLKPKVSCDLRVPFKGSAAFETTKCHWDR

>GmLEA2-97

MADKQPHLNGAYYGPAIPPAEQPRYRPHRERSCCCCLFGILWKILVALIVLVGLAVLIFWL  
VQPRYFKFYVTEADLTQFDYYSNNNTLHYNMVLNFTARNPNKKSIIYDKVEALAFYED  
VRFANYSVITPMNSFRQYKKSSTMSAVLSGQQVPLDNDLVSELNQDKIGGVYEIYVKL  
YFRIRFRLGDVKTTRRFKPKVKCDAKVPLRTMGVNTLFTQTTKCDVDY

>GmLEA2-98

MADKQPHLNGAYYGPAIPPAEQPRYRPHRGRSCCCCLFGILWKILVALIVLVGLAILIFWL  
VQPRYFKFHVTKADLTQFDYYSNNNTLHYNMVLNFTARNPNKKSIIYDKVEALAFYED

VRFANYDVITHMNSFRQYKSSSPMSAVFTGQQVLMLNNEQVSELNQDKNAGVYDIYV  
KLYFRIRFRLGDVISNDYKPKVKCHLKVPFSKNGTFTLFPPTTKCDVDF

>GmLEA2-99

MSVKECHHHHKGKHKHLWRRIFWGIVIFAFIVLLTVLIIWAILKPSKPTFILQDVTVYGFNA  
TIPNFLTSSFQVTLSSRNPNDKIGIYYDRLNTYVVTYRNQQVTYRTSIPPSYQGHKEEDVWSP  
FVYGTNVPVAPYNFVGLSQDQTNGNVLVLVKIDGKVRWKVGSFVSAHYNLNVRCPAFITF  
GPQSNGLGNNNAVKYQLVQRCTVGV

>GmLEA2-100

MSKDKVSGDPRRAVCTGITIFLLLAGVTLLVLWLVRPHKPRFTVIGAAIYGLNTSTPPLM  
STTMQFSVLIKNPNRRVSIYYDRFSAFVSYRNQAITPQVLLPPLYQEKRSSVSVSPVIGGTPL  
PVSVEVSNGLAMDEAYGVVGLRLIFQGRVRWKAGAIKTAHYGLYVKCDVLMGLKKGVLV  
GQVPLLGVTPCDVDL

>GmLEA2-101

MSTSDKSEVVERGAKDDEKPKKEEHEKGGFLDTVKDFIQDIGEKIEGAVGFGKPTADVTGI  
HIPSINLEKAELVVDVLIKNPNPVPIPLIDINYLVESDGRKLVSGLIPDSGTIHAHGEETVKIPL  
TLIFDDIRNTYDDIKPGSIIPYRVKVDLIVDVPVFGRLTLPLEKTGEIPIPKPDIDLDKIQUFER  
FSFEETVAILHLKLDNKNDFDLGLNALDYEVWLGDVSIGGAELAKSAKLVKSGISDIDVPI  
TFRPKDFGSALWDMIRGRGTGYTFKGHIDVDTPFGAMKLPITKEGGTTRLKKNEDSGDDE  
E

>GmLEA2-102

MHNNDHIPVHHVQGNPKPVKLNHRHTMRYAHRVHESLTTRVSKMICATFLGLLFIVGL  
ITFILWLSLRPHRPRFHIHEFNIPGLTQDSGFENAVITFKVSARNSNQNIGVYYESMDGAVY  
YRDTKIGYTPLYPFYQQPKNTTEVDGDLGATLTVSSQRWSEFQSDRADGSVVRLELTS  
VIRFKISTWDSKRHTMHANCNVGVGPDGSLTIYKDKRCPVYFS

>GmLEA2-103

MADHQRLRIHPMEGEAPPPPTTPLVPPGSSKSEKRIPLHHPQLRAMPAAYPTAHKRSCC  
CKCICWIITLLVLLLIIAASVGILYLVFKPKLPDYSVDTLRISDLRLNFDMSLYARFDVKITA  
TNPNNKIGIYYKGGRLSVWYTNTRLCEGSLPQFYQGHENKTMNLVSLSGVQVQSGSTLM  
NALQQQQQTGRIPLDLKVHAPIAIKLGRLKLMKVRVLGECLLVVDSLSSNNLISIKASNCK  
FRLKL

>GmLEA2-104

MATTMPKFKRKLVMGANGRTNPLVWLVAICTIIAVAVVVVGVVFIGYIVIHPRVPVISVTN  
AHLDLLRNDYAGLLQTQLTIVVTAKNGNAKAHASFSAITFNISYQGQDI AVLVADPFEVVK  
NSSKDLSYVVQSSSIPLTPDQMEEVNDAWKRNEIEFDKGAARTQWRVGPLGSVKFLCHL  
DCDLKFRPVNGTYIPSRCTSKSH

>GmLEA2-105

MADKQPHLNGTYYGPAIPPAEQPRNRHHHGRSCCCCLFGILWKILVALIVLVGLVFLIFWL  
VVQPRSFQVTEADLTQFDYYTNNTLHYNMVLNFTARNPNKLSIYYDKVEALAFYE  
DARFANYDVITHMNSFRQYKSTSPMSAVFSGKKVLMLNSEQVSKLNQDKSDGVYDIYV  
KLNFRIRFRLGDSISGNLKPVKCHLKVPFSKSGTFTLFFETTKCSVHF

>GmLEA2-106

MAEMQIQHQEDHNYNPNHIPRSPSPNPTQYTQYRFPKVPVPHHQHVHNMDKATPSRFK  
PNAPKRQHCICITVFLLLLGIILLVLWLAYHPNKPRFTVASASVYSLNATSPPLMSIAMQFN  
VVIKNPNRRVSISFDRLSAYVSYRNQPVTPHVMLPPLFIEKNSAVLSPEIGGVAVPVSEDLT



NGMAMDENYGVVGVKLVLSGRLRWRAGDINSAHYGFYVKCDVLMGLRKGFGVQVPL  
LGAPVCDVNT

>GmLEA2-107

MPRENPDYELFFCRMAATCIAFLIILIFVLCIIFSTYTPSFTVTSITVSKFNVTTHAEELTATF  
NVEGILENPNLAYSIRYQSLDLALWFDNFTIASTTIKQPPFSTQGQTDTPVRAQFAMARRW  
LPSGLASEIVAQRNYHGSVDFGATLVARFRYKFGVLHSSKKVHHFKLYCHPLHVALHSNSTT  
GKLVALVDCKSV

>GmLEA2-108

MPCKPRCIYCTIYIFIFMLCFFLFLIINPSSVKFYVTEATLTQFNLTSNNTLYYNFKVNITV  
TNPKNHMIVYYRTIKAIAWYKDNEFDRVSLTPFDQGYKNTTFLRAVFGQSVIMLKPQQL  
GEYKDETSIGIYNDLAVDFDLRIRAKFGRIKSRRFKDFLKYLCGENCRSFGN

>GmLEA2-109

MVHNCSSSTASLIGHNLCHVIQGLGKKSFSLSIRSHYSLCHSLKRSSLAIVTFLVLSRAPPIA  
LLSVASFKGCCCCLFLLFPFLALLVLAVVLVHIVAVKPKKLQFDLEQLGVQYMGITHNPPSIA  
SLSLTIHLLFAATNPNKVGIKYQSSFTFMYRGIPLGKATIFDFFQPPYSTRQLIAVDRVNLL  
EVDAADLIRDASLRFLGDVAAKIRFNLRTASGDVVPINLEIEDTCRRSNAARRRREQDTEG  
SSYTSPPPLSPHAKMDGEPARRVTLEDFSNTATPHFFTSIAKPEVQAANICYPHSLIQLIQGN  
LFHGLPSEDPYAHLASYIEICNTVKIAGVPEDAEEVVEKFLKKYFPESKTAEGKMEISSFHQ  
FPDESLSEALDRFHGLLRKTLTHGYSEPVQLNIFIDGLRPQSKQLLDASAGGKIKLKTPKEA  
MELIENMAASDQAILHDRSYMPTKRSLELGTQDATLAHNKLLTRQIEALTETLSKLPQQL  
QAVSSSHSSVLQVEGCPTCGGTHEPGQCVSQQDTSQEVNYMGIPNRRFQGYNQGNSSGF  
HQGGAGFNHGPPGFNQGRNFMQGSWNRNQNQYKEQRNQQPYQPPCPHPSQGPNQQE  
KPTNIEELL

>GmLEA2-110

MSLLFLIIVAIVIVALFFTIFRPKDPNIIVHPVGFENFNPSLLTNVTANVSLGMLTIENSNYEN  
FEYPNATGYIKFHDTVVGVPIVIGELVPPRSQINVNTSANFMVAKLINDPNFLSDFLSGIVN  
FTSTASLPGKAHMLKIIKFKATVYSSCDISLNITSRNVDKSKISKIKL

>GmLEA2-111

MVACCSMRCSKGLKICCGVTALLLILIVVLVVLFFTIFKPKDPDIVLQSVKLDGFKLEVFP  
LKLNVSLGIVVTVENPNHGSFTYQNSTAFLYYRGNLVAEAPLHQDTIPARNDHNISTSLTIF  
VDLTKFKDLPSDYSGGVINFTSTTTLLGKVKVLDLDFKIKATSYSTCDLSLFDVNDQTINSTCN  
SEIKF

>GmLEA2-112

MFFFAESPNDILKPRRNIEPSLSLSLPLSSLSLWEEQSRRSNRKQNHRTSEPPVLRSSGAKN  
RSATRTAPPRPKTAPLHMCP SRMGATLLRPAIAAATAAIDNYVNTTYSDCSDFSDSLAL  
NLVLRFCQAKKQYHHSANFNGSSVEQPLKCNPTHPRSTVSLNFRDCRLSFDNGSFEGTSRI  
KVGSGKGRKVCLTVTGVIIVLLIVILALT VFKAKHPVTIVDSTKLEDFHVS LDPVKLRV  
DLNVTLGVDVSVKNPNKVG FQYSDSAAHLN YRGQLIGEVPI SAGEISSGETKGFNLTHTIM  
ADRLLSNSQLLSDVTSGLPLSTFVRMSGKVSILGFIKVHVVSSTSCDVAINLSNGTVGNQ  
ECQYKTKL

>GmLEA2-113

MLITIENPNYENFEYPNATGYVKFLDTVVGVPIVIGELVPPRSQINVNTSANFMVSKLIND  
PNFLSDFLSGIVNFTSTASLPGKAHMLKIIKFKATVYSLCDISINITSRNVDKSKISKIKI

**Table S3.** Pairwise identities between homologous pairs of soybean LEA2 proteins.

| Gene name     | Score              | Expect    | Identities   | Positives        | Gaps           | Duplication pattern |
|---------------|--------------------|-----------|--------------|------------------|----------------|---------------------|
| GmLEA2-5/52   | 397bits<br>(1019)  | 5.00E-146 | 189/207(91%) | 198/207<br>(95%) | 0/207<br>(0%)  |                     |
| GmLEA2-17/99  | 384 bits<br>(985)  | 5.00E-140 | 188/197(95%) | 193/197<br>(97%) | 0/197<br>(0%)  | segmental           |
| GmLEA2-59/64  | 387 bits<br>(994)  | 4.00E-142 | 202/214(94%) | 207/214<br>(96%) | 1/214<br>(0%)  |                     |
| GmLEA2-65/74  | 329 bits<br>(844)  | 5.00E-119 | 178/221(81%) | 202/221<br>(91%) | 3/221<br>(1%)  | segmental           |
| GmLEA2-22/30  | 344 bits<br>(883)  | 4.00E-125 | 170/177(96%) | 173/177<br>(97%) | 1/177<br>(0%)  |                     |
| GmLEA2-18/100 | 376 bits<br>(966)  | 2.00E-138 | 184/197(93%) | 193/197<br>(97%) | 0/197<br>(0%)  | segmental           |
| GmLEA2-33/106 | 424 bits<br>(1091) | 2.00E-155 | 226/249(91%) | 237/249<br>(95%) | 2/249<br>(0%)  | segmental           |
| GmLEA2-54/102 | 460 bits<br>(1183) | 3E-170    | 218/227(96%) | 221/227<br>(97%) | 0/227<br>(0%)  | segmental           |
| GmLEA2-34/48  | 497 bits<br>(1279) | 0         | 271/314(86%) | 280/314<br>(89%) | 6/314<br>(1%)  |                     |
| GmLEA2-76/83  | 525 bits<br>(1351) | 0         | 264/305(87%) | 274/305<br>(89%) | 10/305<br>(3%) | segmental           |
| GmLEA2-58/63  | 494bits<br>(1272)  | 3.00E-180 | 286/347(82%) | 292/347<br>(84%) | 30/347<br>(8%) |                     |
| GmLEA2-23/90  | 594 bits<br>(1531) | 0         | 311/324(96%) | 316/324<br>(97%) | 1/324<br>(0%)  |                     |
| GmLEA2-36/46  | 559 bits<br>(1441) | 0         | 283/297(95%) | 291/297<br>(97%) | 0/297<br>(0%)  |                     |
| GmLEA2-4/55   | 212 bits<br>(540)  | 3.00E-74  | 105/124(85%) | 112/124<br>(90%) | 0/124<br>(0%)  | segmental           |
| GmLEA2-69/86  | 391bits<br>(1004)  | 5.00E-144 | 186/203(92%) | 197/203<br>(97%) | 0/203<br>(0%)  | segmental           |
| GmLEA2-37/39  | 353 bits<br>(905)  | 1.00E-128 | 179/209(86%) | 185/209<br>(88%) | 10/209<br>(4%) | tandem              |
| GmLEA2-6/50   | 390 bits<br>(1001) | 5.00E-142 | 212/246(86%) | 222/246<br>(90%) | 4/246<br>(1%)  |                     |
| GmLEA2-12/96  | 395 bits<br>(1015) | 5E-145    | 202/221(91%) | 208/221<br>(94%) | 5/221<br>(2%)  | segmental           |
| GmLEA2-13/97  | 434 bits<br>(1116) | 4E-160    | 208/227(92%) | 217/227<br>(95%) | 0/227<br>(0%)  | segmental           |
| GmLEA2-16/98  | 448 bits<br>(1153) | 1E-165    | 213/229(93%) | 222/229<br>(96%) | 2/229<br>(0%)  | segmental           |
| GmLEA2-15/105 | 401 bits           | 6E-147    | 194/197(98%) | 195/197          | 0/197          | tandem              |

|                |                    |        |              |                  |                 |           |
|----------------|--------------------|--------|--------------|------------------|-----------------|-----------|
|                | (1031)             |        |              | (98%)            | (0%)            |           |
| GmLEA2-21/29   | 413 bits<br>(1061) | 9E-151 | 206/241(85%) | 220/241<br>(91%) | 3/241<br>(1%)   | segmental |
| GmLEA2-24/43   | 389 bits<br>(998)  | 2E-141 | 208/250(83%) | 222/250<br>(88%) | 6/250<br>(2%)   | segmental |
| GmLEA2-67/70   | 249 bits<br>(635)  | 4E-88  | 143/232(62%) | 154/232<br>(66%) | 66/232<br>(28%) | segmental |
| GmLEA2-8/80    | 443 bits<br>(1139) | 4E-162 | 256/273(94%) | 262/273<br>(95%) | 0/273<br>(0%)   | segmental |
| GmLEA2-53/103  | 406 bits<br>(1043) | 3E-148 | 228/253(90%) | 237/253<br>(93%) | 4/253<br>(1%)   | segmental |
| GmLEA2-7/82    | 448 bits<br>(1153) | 1E-164 | 242/260(93%) | 252/260<br>(96%) | 5/260<br>(1%)   |           |
| GmLEA2-62/91   | 431 bits<br>(1107) | 4E-158 | 229/246(93%) | 236/246<br>(95%) | 2/246<br>(0%)   |           |
| GmLEA2-20/28   | 522 bits<br>(1345) | 0      | 250/256(98%) | 253/256<br>(98%) | 0/256<br>(0%)   | segmental |
| GmLEA2-75/84   | 504 bits<br>(1299) | 0      | 244/254(96%) | 248/254<br>(97%) | 0/254<br>(0%)   | segmental |
| GmLEA2-44/85   | 373 bits<br>(957)  | 7E-135 | 232/260(89%) | 236/260<br>(90%) | 7/260<br>(2%)   | segmental |
| GmLEA2-1/49    | 407 bits<br>(1045) | 2E-149 | 198/216(92%) | 205/216<br>(94%) | 3/216<br>(1%)   |           |
| GmLEA2-10/78   | 449 bits<br>(1154) | 1E-165 | 218/224(97%) | 222/224<br>(99%) | 0/224<br>(0%)   | segmental |
| GmLEA2-73/107  |                    |        |              |                  |                 |           |
| GmLEA2-60/61   |                    |        |              |                  |                 |           |
| GmLEA2-26/41   | 356 bits<br>(914)  | 7E-130 | 185/190(97%) | 189/190<br>(99%) | 0/190<br>(0%)   | segmental |
| GmLEA2-2/57    | 271 bits<br>(694)  | 1E-97  | 137/186(74%) | 151/186<br>(81%) | 11/186<br>(5%)  |           |
| GmLEA2-110/113 | 232 bits<br>(592)  | 2E-83  | 114/122(93%) | 118/122<br>(96%) | 0/122<br>(0%)   | segmental |
| GmLEA2-66/72   | 336 bits<br>(862)  | 7E-123 | 166/186(89%) | 171/186<br>(91%) | 0/186<br>(0%)   | segmental |
| GmLEA2-25/40   | 376 bits<br>(965)  | 3E-137 | 201/227(89%) | 212/227<br>(93%) | 4/227<br>(1%)   | segmental |
| GmLEA2-45/81   | 288 bits<br>(736)  | 1E-103 | 144/161(89%) | 149/161<br>(92%) | 0/161<br>(0%)   |           |
| GmLEA2-11/112  | 374 bits<br>(959)  | 2E-134 | 187/192(97%) | 189/192<br>(98%) | 0/192<br>(0%)   |           |
| GmLEA2-35/47   | 272 bits<br>(695)  | 6E-97  | 137/151(91%) | 141/151<br>(93%) | 1/151<br>(0%)   |           |

|              |                   |       |              |                  |           |           |
|--------------|-------------------|-------|--------------|------------------|-----------|-----------|
| GmLEA2-88/95 | 266 bits<br>(680) | 5E-96 | 131/152(86%) | 141/152(92%<br>) | 0/152(0%) |           |
| GmLEA2-9/79  | 617bits<br>(1590) | 0     | 313/319(98%) | 315/319(98%<br>) | 0/319(0%) | segmental |

**Table S4.** The amino acid sequences of Arabidopsis proteins of LEA2 domain.

>AT1G01470.1

MASLLDKAKDFVADKLTAIKPEGSVTDVDLKDVNRSVEYLAKVSVTNPYSHSIPICEISFTFHSAGREIGKGIKIP  
DPGSLKAKDMTALDIPVVVPYSILFNLARDVGVWDIDYELQIGLTIDLPVVGFEFTIPISSKGEIKLPTFKDFF

>AT1G08160.1

MVPPNPAHQPARRTQPQLQPQSQPRAQPLPGRRMNPVLCIIVALVLLGLLVGLAILITYLTRPKRLIYTVAAASV  
QEFAIGNDDHINAKFSYVIKSYNPEKHVSVRYHSMRISTAHNNQSVAHKNISPFKQRPKNETRIETQLVSHNVA  
LSKNARDLRAEKSGTIEMEVYITARVSYKTWIFRSRRRTLKAVCTPVMINVTSSSLDGFQVLCCTRL

>AT1G17620.1

MTDDRVPYASKPPAIVGGGAPTTNPTFPANKAQLYNANRPAYRPPAGRRRTSHTRGCCCRCCCWTFIVIIILLI  
VAAASAVVYLIYRQRPSTFVSELKISTLNFTSAVRLTTAISLSVIARNPNKNVGFYDVTIDITLYKASTGGDDVVI  
GKGTIAAFSHGKKNNTTLRSTIGSPPDELDEISAGKLGDLKAKKAVAIVLNSKVKVKMGALKTPKSGIRVTCEG  
IKVVAPTGGKATTATTTAAKCKVDPRFKIWKITF

>AT1G32270.1

MVRSNDVKFQVYDAELTHFDLESNNNLQYSLNLSIRNSKSSIGIHYDRFEATVYYMNQRLGAVPMPFLYLGSK  
NTMLLRALFEGQTLVLLKGNERRKFEDDQKTGVYRIDVKLSINFRVMVLHLLVTPMKPVVRCHLKIPLALGSSN  
STGGHKKMLLIGQLVKDTSANLREASETDHRRDVAQSKKIADAKLAKDFEALKEFQKAQHITVERETSYPFDP  
KGSFSSSEVDIGYDRSEQRVLMESRRQEIVLLDNEISLNEARIEAREQGIQEVKHQISEVMEMFKDLAVMVDH  
QGTIDDIDEKIDNLSAAAQKSHLVKASNTQGSNSLLFSCSLLFFFLSGDLCRCVCVGENPRLNPTRRKAW  
CEEEDEEQKQKQKKTMSKRRREKKNKPNQNGFVFCVLGHK

>AT1G52330.1

MTVEEDPKATPSLPDYKPLPSSSSHELNDAVLISSHPSPSRRRFIISIFLISFASILIYIFWPSDPRIKIIRVKISHVHVH  
RRPVPSIDMTLLVTLKVSADVYSFDFDLDVTDIDYRGKTLGHVSSDGGHVTAFGSSYLDAEALDGMVMFPDVI  
HLIHDLAKGSVEFDVTETNGKLGVLFFRFPLKAKVACGILVDTVNQTISRQSCSPL

>AT1G54540.1

MGDQKIHVPVLQMEANKTKTTTPAGKTVLLPVQRPIPPVIPSKNRNMCKKIFCWVLSLLVIALIALIAVAVV  
YFVHFHKLPSYEVNSLRVTNLGINLDLSLSAEFKVEITARNPNEKIGIYYEKGGHIGVWYDKTKLCEGPIPRFYQGH  
RNVTKLNVALTGRAQYGNVLAALQQQQQTGRVPLDLKVNAPVAIKLGNLKMKKIRILGSKLVVDSLSTNNNI  
NIKASDCSFKAKL

>AT1G61760.1

MHNKVDLSPVRSNPSTRPISRHHASNIVHRVKESLTRVSKLCAIFLSLLCLGITFILWISLQPHRPRVHIRGFSI  
SGLSRPDGFETSHISFKITAHNPQNVGIYYDSMEGVSYYYKEKRIGSTKLTNPFYQDPKNTSSIDGALSRPAMAV  
NKDRWMEMERDRNQGKIMFRLKVRSMIRFKVYTWHSKSHKMYASCYIEIGWDGMLLSATKDKRCPVYFT

>AT1G64065.1

MVDEDRLAPTEIYGRSDEEQSGPRIWRRKTEPPGKCLVSLTIIVIFALCLLSSIFLRISKPEIETRSISTRDLRSG  
GNSTNPFYFNATLVSDISIRNSNFGAFEFEDSTLRVYADHGTVGETKIEGRRVEAHKTVRITGVVVEIGSFRLD  
KDLDKDLRGLFELRSVAEVRGRIKVLGRKRWKVSVMSCTMRLNLTGRFIQNLLCE

>AT1G65690.1

MSQHQQIYPVQDPEAATARPTAPLVPRGSSRSEHGDPKSVPLNQRQRFVPLAPPKRRSCCCRCFCYTCFLL  
LVAVGASIGILYLVFKPLPDYSIDRLQLTRFALNQDSSLTAFNVTITAKNPNEKIGIYYEDGSKITVWYMEHQLS  
NGSLPKFYQGHENTTVIYVEMTGQTQNASGLRTTLEEQQRTGNIPLRIRVNQPVRVKFGKLLFEVRFVRCG  
VFVDSLATNNVIKIQSSSCKFRLRL

>AT2G01080.1

MPPPPSSSRAGLNGDPIAAQNQQPYRSYSSSSSASLKGCCCLFLLFAFLALLVLAVVLIVLAVKPKPKQFDLQQ

VAVVYMGISNPSAVLDPTTASLSLTIRMLFTAVNPNKVGIRYGESSFTV/MYKGMPLGRATVPGFYQDAHSTKNV  
EATISVDRVNLMQAHAADLVRDASLNDRVELTVRGDVGAKIRVMNFDSPGVQVSVNCGIGISPRKQALYKQC  
GFDGLSV

>AT2G27080.1

MAERVYPADSPQSGQFSGNFSSGEFPKKPAPPSTYVIQVPKDQIYRIPPENAHRFEQLSRKKTNRSNCRCCF  
CSFLAAVILIVLAGISFAVLYLIYRPEAPKYSIEGFSVSGINLNSTSPISPSFNVTVRSRNGNGKIGVYVEKESSVDVY  
YNDVDISNGVMPVFYQPAKNVTVVKLVLSGSKIQLTSGMRKEMRNEVSKKTVPFKLKIKAPVKIKFGSVKTWT  
MIVNVDCDVTVDKLTAPSRIKCSHDVDLW

>AT2G27260.1

MQDPSRPATGYPPYPYYPNPQQQQPPTNGYPNPAAGTAYPYQNHNPYYAPQPNPRAVIIRRLFIVFTTFLLLGL  
ILFIFFLIVRPQLPDVNLNSLSVSNFVSNQVSGKWDLQLQFRNPNSKMSLHYETALCAMYNNRVSLSETRLQ  
PFDQGGKQDQTVVNATLSVSGTYVDGRLVDSIGKERSVKGNEFDLRMISYVTFRYGAFRRRRRYVTYCDVAVG  
VPVSSGEGKMGVSSKRCKTY

>AT2G30505.1

MSELLPPPPPPPPPPRRD SGFGDPALVFPEFAAKQCGLEKVEE EGEDEDSSYGKGSFDLSSRFSSPSISRNR  
DDVENPKKASSFKRPPSARLSGFR EEEADR SRKSGSFVDHIGQEDKRICASGCFRCCACTCMFVSVLLI  
VLLVGLSANSSIKSILPQVLVTNLKFSRLDIKSSD LLMNANLNTVLQLSNNDKTVLYYSPMKADISSENINLGK  
KTLSGFKQDPGNVTSKILTRLRKS KVVYDV DATLLTNKEKTLEALVDVFLRGKLSVDWLGFKVHIPIVACESVKQS  
DVINGLKPACDVRIFSE

>AT2G35460.1

MANGLNGASYGPPKPPVKTYSHGRRGSDVGCIGCGFSSCLCCGGCLVNIICNILIGVLVCLGVVALILWFILR  
PNVVKFQVTEADLTRFEFDRSHNLHYNISLNF SIRNPNQRLGIHYDQLEVRGYYGDQRFSAANMTSFYQGHK  
NTTVVGTENLNGQKLVLLGAGRRDFREDRRSGVYRIDVKLRFKLRFKFGFLNSWAVRPKIKCHLKVPLSTSSSDE  
RFQFHPTKCHVDL

>AT2G35960.1

MTTKDCGNHGGGGGGGTASRICGVIIGFIIIVLITIFLVWIIQPTKPRFILQDATVYAFNLSQPNLLTSNFQITIASR  
NRNSRIGIYYDRLHVYATYRNQQITLRTAIPPTYQGHKEDNVWSPFVYGNVPIAPFNAVALGDEQNRGFVTLII  
RADGRVRWKVGTLTIGKYHLHVRCQAFINLADKAAGVHVGENAVKYMLINKCSVNV

>AT2G35970.1

MTTKECGNHGGGGGGGTACRICGAIIGFIIIVLMTIFLVSIILQPKPEFILQD TT VYAFNLSQPNLLTSKFQITIAS  
RNRNSNIGIYYDHLHAYASYRNQQITLASDLPTTYQRHKENSVWSPLLYGNQVPIAPFNAVALGDEQNSGVFTL  
TICVDGRVRWKVGTLTIGNYHLHVRCQAFINQADKAAGVHVGENTVKYTLINKCSVNF

>AT2G35980.1

MAAEQPLNGAFYGPSVPPAPKGYRRGHGRGCGCLLSLVKVIISLIVLGVAAALIFWLIVRPRAIKFHVTDASL  
TRFDHTSPDNILRYNLALTVPVRNPNKRIGLYDRIEAHAYYEGKRFTITLTPFYQGHKNTTVLTPTFQGNLVIF  
NAGQSRTLNAERISGVYNIIEIKFRLRVRFKLDLKFRRIKPKVDCDDLRLPLSTSNGT TTTSTVFPIKCDFDF

>AT2G41990.1

MHAKTDEATSIDAAAALSPRSAIRPLYVQSPSNHDVEKMSFGSGCLMGSPTHPHYHCSPIHHSRESSTSRF  
SDRALLSYKSIRERRRYINDGDDKT DGGDDDDPFRNVRLYVWLLSVIFLFTVFSLILWGASKSYPPKVTVKGMLV  
RDLNLQAGNDLSGVPTDMLSLNSTVRIYRNPTFFAVHVTASPLLLHYSNLLSSGEMNKFTVGRNGETNVVT  
VVQGHQIPLYGGVFSHLDTSLPLNLTIVLHSAKAYILGRVTSKFYTRIICSFTLDANHLPKSISLLRSCIP

>AT2G44000.1

MSVYAETAYGRRSKDVDEARRIYQPKQSDITGKIIIFILAGLCMLLFIFIVIGFFFIKPLTASLTSVEVRNLRYNNTS  
SSSLYFNATLAMEIRIENPNLGF FEFPTS RGEILYNGDVV GEMRINGQRVASFGDLRTEVSAEVAYRGN

QKSPVWLKNDIERRLIILETRAKLRGEVHLKDLNKRTVNLKCLMQLNLSDDVIHRLWCK

>AT2G44060.1

MSTSEDKPEIISRVVHQEGDVEIVDRSQKDKDEEKEEGKGGFLDKVKDFIHDIGELEGKTIGFGKPTADVSAIHIP  
KINLERADIVVDVLVKNPNPVIPLIDVNYLVESDGRKLVSGLIPDAGTLKAHGEETVKIPLTLIYDDIKSTYNDINP  
GMIIIPYRIKVDLIVDVPVLRGLTLPLEKCGEIPKPKPDVDIEKIKFQKFSLEETVAILHVRLOQNMNDFDLGLNDLDC  
EVWLCDVSIKAEIADSIKLDKNGSGLINVPMTFRPKDFGSALWDMIRGKGTGYTIKGNIDVDTPFGAMKLPKIK  
EGGETRLKEDDDDDDEE

>AT2G46140.1

MASADEKVVEEKASVISSLLDKAKGFFAEKLANIPTPEATVDDVDFKGVTRDGVVYHAKVSVKNPYSQSIPICQIS  
YILKSATRTIASGTIPDPGSLVSGTTLVLDVPVKVAYSIAVSLMKDMCTDWDIDYQLDIGLTFDIPVVGDITIPVST  
QGEIKLPSLRDFF

>AT2G46150.1

MADSEHVRPLAPATILPVSEASNIKNTHRSRNIKCSICVTATSLITTLVTLVFTVFRVKDPIIKMNGVMVNGL  
DSVTGTNQVQLLGTNISMIVDVSVKNPNTASFKYSNTTDDIYYKGLVGEAHLPGKARPHRTSRMNVTVDIM  
LDRILSDPGLGREISRGLVNVWSYTRVGGKVKIMGIVKKHVTVKMNCTMAVNITGQAIQDVDCCKKIDL

>AT2G46300.1

MADYQMNPVLQKPPGYRDPNMSSPPPPPIQQQPMRKAVPMPTSYRPKKRRRSCCFCCCCICITLVLFIFLL  
LVGTAVFYLWFDPKLPTFSLASFRLDGFKLADDPDGASLATAVARVEMKNPNKLVFYYGNTAVDLSVSGSND  
ETGMGETTMNGFRQGPKNSTSVKVVETTVKNQLVERGLAKRLAAKFQSKDLVINVVAKTQVGLVGGIKIGMLA  
VNLRCGGVSLNKLDTDSPKCILNLTWKVVTIQ

>AT3G05975.1

MSKRRICIVSGIIFVLFVIFMTALILAQVFKPKHPILQTVSSTVDGISTNISLPYEVQLNFTLLEMLLKNPNVADFE  
YKTVENLVYRDTLVGNLTLPSSTLPKGSVLLPCPLFLQLDKFVANLGDIVQDVLHGKIVMETRAKMPGKITLLGI  
FKIPLDSISHCNLVLGFPSPMVVEDQVCDLTKTL

>AT3G11650.1

MGSKQPYLNGAYYGPSIPPPKAHRSYNSPGFGCCCFSLGSLRCCGCCILSLICNIIAVAVILGVAALILWLIFR  
PNAVIFYVADANLNRFSFDPNPNLHYSLDLNFTRNPNQRVGVYDEFVSVGGYDQRFSGANVSSFYQGHKN  
TTVILTKEIQNLVVLGDGARTDLKDDEKSGIYRINAKLRSLVRFKFWFIKSWKLPKIKCDDLKIPLGSSNSTGGF  
KFQPVQCDFDLS

>AT3G11660.1

MKDCENHGHSRRKLIRRIWFWSIIFVLFIFLITILLIWIILQPSKPRFILQDATVYAFNVSGNPPNLLTSNFQITLSSRNP  
NNKIGIYYDRLDVYATYRSQQITFPTSIPPTYQGHKDVDIWSPFVYGTSPVPIAPFNGVSLDTRDKDNGVLLIIRAD  
GRVRWKVGTFITGKYHLHVKCPAYINFGNKANGVIVGDNAVKYTFTTSCSVSV

>AT3G20590.1

MTKIDPEEELGRKCCTCFKFIPTTRLGALILWLSLRAKKPKCSIQNFYIPALSKNLSSRDNTTLNFMVRCNDPNKD  
KGIYYDDVHLTFSTINTTTTSSDLVLVANYTVPKFYQGHKKKAKKWGQVWPLNNQTVLRAVLPNGSAVFRDL  
KTHVRFKIVFWKTKWYRRIKVGADVEVNGDGVKANEKEIKMEKSNFWKTHGYWSEFGFDDDELTDGDAQK  
KGSKTKKSDSSLPLRSSFPFVLMNLLVFFAIR

>AT3G20600.1

MNNQNEDEGGRNCCTCLSIFITAGLTSFLWLSLRADKPKCSIQNFIPALGKDPNSRDNTTLNFMVRCNDP  
NKDKGIYYDDVHLNFSTINTTKINSSALVLVGNYPKPYQGHKKKAKKWGQVWPLNNQTVLRAVLPNGSAVFR  
LDLKTQVRFKIVFWKTKRYGVEVGADVEVNGDGVKAQKKGKIKMKSDSSFLRSSFPISVLMNLLVFFAIR

>AT3G24600.1

MKMYPKSDSDVTSLDLSSPKRPTYVQSPSRDSKSSSVALTTHQTTPTESPHSASRSVSNNGGGGFRWKGR

RKYHGGIWWPADKEEGDGRYEDLYEDNRGVSIVTCRLILGVVATLSIFFLLCSVLFGASQSSPPVIYIKGVNVRS  
FYYEGSDNTGVPTKIMNVKCSVVITHTNPSTLFGIHVSSTAVSLIYSRQFTLANARLSYHQPKQSNHTSRINLIG  
SKVPLYGAGAELVADNSGGVVPVHTPNYITLSESRSSSRTSNGTSGMGFRWKGSRRSNMYWPEKPYTINE  
DEVYDDNRGLSVGQCRAVLVILGTVVVFSVFCVLWGASHPFSPIVSVKSDIHSFYGGEGIDRTGVATKILSFNS  
SVKVTIDSPAPYFGIHSVSTFKLTFSAFLTATGQLKSYQPRKSKHISIVKLTGAEVPLYGAGPHLAASDKKGVVPV  
KLEFEIRSRGNLLGKLVKSKHENHVSCSFFISSKTSKPIEFTHKTCKLVTK

>AT3G26350.1

MSHHHHHETNPHFARIPSNPHLKSGGASTSQTSSNQPHIPPHPKKSHHKTTQPHPVAPPILIKTRGRHRE  
NPIQEPKHSVIPVPLSPEERLPPRKTQNSSKRPLLLSPEDNQQRPPPPQAPQRNGGGYGSTLPPPKPSPWRT  
APTSPHHRGRPLPPSRETNAMTWSAAFCCAIFWVILGLLILVYLVYRPRSPYVDISAANLNAAYLDMGF  
LLNGDLTILANVTNPSKSSVEFSYVTFELYYYNTLIATQYIEPFKVPKKTSMFANVHLVSSQVQLQATQSRELQRQ  
IETGPVLLNLRGMFHARSHIGPLFRYSYKLHTHCSVSLNGPPLGAMRARRCNTKR

>AT3G44220.1

MTEKECEHHHDEDEKMRKRIGALVGLAFLAVLVVFLVWAILHPHGPRFVLQDATIYAFNVSQPNYLTSLNQLVT  
LSSRNPNDKIGIFYDRLDIYASRNQQVTLATLLPATYQGHLDVTIWSPFYGTTPVPAPYFSPALSQDLTAGMVLL  
NIKIDGWVRWVGTWVSGRYRLHVNCPAYITLAGHFSGDGPVAVKYQLVQRCAVDV

>AT3G44380.1

MGSRDQKVKWSWSSALIGAASATAAASLLSAKPKDPTFHLSIDLTLKLNLPVLDAELMLTVHVTNPNIAAIHYS  
STKMTILYDGTVLGSAEVKAGSQPARSCQLLRLPARLDGMELAQHARQFFSDVANREMKLEAKLTIEGAAKVL  
WWDHSFRVHVDSFVTVDPVFLDVIGQENKSQLDLFLT

>AT3G52470.1

MSKDCGNHGGGKEVVVRKLCAAIIAFIVIVLITIFLVWVILRPTKPRFVLQDATVYAFNLSQPNLLTSNFQVTIASR  
NPNSKIGIYYDRLHVVATYMNQQITLRTAIPPTYQGHKEVNVWSPFVYGTAVPIAPYNSVALGEEKDRGFVGLMI  
RADGTVRWKVRTLITGKYHIHVRCQAFINLGNKAAGVLVGDNAVKYTLANKCSVNV

>AT3G54200.1

MSDFSIKPDDKKEEKPATAMLPPPKNASSMETQSANTGTAKLRRRNCKICICFTILLILLIAIVIVILAFTLFKP  
KRPTTTIDSVTVDRLQASVNPVLLKVLNLTNLVDLSLKNPNRIGFSYDSSSALLNYRGQVIGEAPLPANRIAARKT  
VPLNITLTMADRLLSETQLLSDVMAGVIPLNTFVKVTGKVTVLKIFKIKVQSSSSCDLSISVSDRNVTSQHCKYST  
KL

>AT4G01410.1

MGEGEAKAEHAADHKNAPSASSTPESYSKEGGGGGDARRAICGAIFTILVILGIIALILWLVRPHKPRLTVV  
GAAIYDLNFTAPPLISTSVQFSVLARNPNRRVSIHYDKLSMYVTKDQIITPPLPLPLRLGHKSTVVIAPVMGGN  
GIPVSPEVANGLKNDEAYGVVLMRVVIFGRLRWKAGAIKTGRYGFYARCDVWLRFPSSNGQVPLLAPSTCKV  
DV

>AT4G05220.1

MTPDRTTIPRTSPVPRAQPMKRHHSASYAHRVRESLSTRISKFICAMFLLVFFVGVIAFILWLSLRPHRPRFHI  
QDFVVQGLDQPTGVENARIAFNVTILNPNQHMGVYFDSMEGSIYKDQRVGLIPLNPFQQTNTTIVTGT  
TGASLTVNSNRWTEFSNDRAQGTGVFRLDIVSTIRFKLHRWISKHHRMHANCNIVVGRDGLILPKFNHKRCPV  
YFT

>AT4G09590.1

MTTKECGNHGGGGGGGTACRICGAIIGFIIIIVLMTIFLVWIIQPKNPEFILQDTTVYAFNLSQPNLLTSKFQITIA  
SRNRNSNIGIYYDHLHAYASRNQQITLASDLPPTYQRHKEDSVWSPLLYGNQVPIAPFNAVALGDEQNSGVFTL  
TICVDGQVRWVGTLTIGNYHLHVRCQAFINQADKAAGVHVAGENTVKYTLINKCSVNF

>AT4G13270.1



MASSKHEDYGIPYTPLSSQPSQSVILLTPYRRHRRPSLLRNLRCSLLFTAVILLLSAAVYLLYPSDPDITVSRINLNHI  
SVVDSHKIALDLSFSLTIKVRNRDFFSLDYDSLVSIGYRGRELGLVKSCKGHLKARDSSYIDATLELDGLEVVDVI  
YLIGDLAKGVIPFDITIAQVQGDGLVLLFNIPQKGVSEVYVNVNNQKISHQDCHRK

>AT4G23610.1

MELAMSKINEDQAKPLAPLFLTRSDQPDEEDQYHHDRTKYVHSQTKLILCCGFASLTMLIAVTFIVLSLTVFHL  
HSPNLTVDISFNQRFDVNGKVNNTQNTTQSVSEISLHNPALFIVKNNVVSFYHGELVVVGESIRRSETIPAKR  
TVKMNLTAEIVKTKLLASPLMEDLNDRGVDLKSSVEVRGRVKKMKIFRKTVHLQTDCCFMKMTTNNFLPTF  
QCF

>AT4G23930.1

MSKSCSNLASCVAATLFLIVFLIIAALTVYLTVFRPRDPEISVTSVKVPSFSVANSSVSFTFSQFSAVRNPNRAAFSHY  
NNVIQLFYGNRIGYTFVPAGEIESGRTRMLATFSVQSFPLAAASSSQISAAQFQNSDRSGSTVEIESKLEMAGR  
VRVLGLFTHRIAACNCRIAISSSDGSIVAVRC

>AT4G26490.1

MPNPLPHLPPPPQLQPETPSWETPSSVWYTPRTTPWRTTQSTQSTPVGQMVLTTPATVRFNGLDAEPRKDRV  
ILRQPRSSRTSLWIWCVAGFCVFSLLLIFFAIATLIVFLAIRPRIPVFDIPNANLHTIYFDTPEFFNGDLSMLVNFT  
NPNKKIEVKFEKRIELFFFNRLIAAQVVPFLQKKHETRLEPIRLISSLVGLPVNHAVELRRQLENNKIEYEIRGTFK  
VKAHFGLMIHYSYQLHGRCQLQMTGPPTGILISRNCTTK

>AT4G35170.1

MMTWPARSSPQNTRKPVYVHSPNTDVKISTGSGFSPFGSPLNDQGQVSNFQHHSVAESSYPRSSGPLR  
NEYSSVQVHDLDRRTHEDEYDEMGPDEKRRRITRFYSCLLFTLVLAFTLFLILWGVSKSFAPATLKEMVLEN  
LNVQSGNDQSGVLTDMTLNSTVRILYRNPAFTTWHVTSAPLQLSYQLILASGQMGEFSQRRKSERIETKVF  
DQIPLYGGVPALFGQRAEPDQVVLPLNLTFTLRARAYVLGRLVKTTFHSNIKCSITFYGDKLGLTDLDSKSCSDH

>AT5G22200.1

MTGRYCDQHNGYEERRMRMMRRIAWACLGLIVAVAFVFLVWAILPHGPRFVLQDVTINDFNVSQPNFL  
SSNLQVTVSSRNPNNDKIGIFYDRLDIYVYRNQEVTLARLLPSTYQGHLEVTWVSPFLIGSAVPVAPYLSSALNED  
LFAGLVLLNIKIDGWVRWKVGSVWVSGSYRLHVNCPAFITVTGKLTGTGPAIKYQLVQRCAVDV

>AT5G21130.1

MTVEKPEMTGDTNSDGFNTKDVHRIKHPSLDTNDSSSSRYSVDSQKSRIGPPPGTYVIKLPKDQIYRVPPPE  
NAHRYEYLSRRKTNKSCRRCLCYLSALLIIIVLAAIAFGFFLVYQPHKPQFSVSGVSVTGINTSSSPFSPVIRIKL  
RSQNVKGLGLIYKGNADVFFNGTKLNGEFTAFKQPAQNVTVIVTVLKGSSVVKLSSSRKELTESQKKGKVPF  
GLRIKAPVKFKVGSVTTWTMTITVDCKITVDKLTASATVKTENCETGLSLL

>AT5G06330.1

MTSKDCGSHDSSHSSCNRKIVWTISIILLILVILLVWAILQPSKPRFVLQDATVFNFNVSNGNPPNLLTSNFQFTLS  
SRNPNDKIGIYDRLDVYASRSQITLPSPLTTYQGHKEVNVWSPFVGGYSVPVAPYNAFYLDQDHSSGAI  
MLMLHLDGRVRWKVGSFITGKYHLHVRCHALINFGSSAAGVIVGKYMLETETCSVSV

>AT5G06320.1

MADLNGAYYGPSIPPPKVVSHSHGRRGGGCGCLGDCGCCILSVIFNITIAVLLGIAALIIWLIFRPNAIKFH  
VTDALTEFTLDPTNLRNLDLNFITIRNPNRRIGVYDEIEVRGYYGDRFGMSNNISKFYQGHKNTTVVGTK  
LVGQQLVLLDGGERKDLNEDVNSQIYRIDAKRLKIRFKGLIKSWRFKPKIKCDLVPLTSNSTSGFVFQPTKCDV  
DF

>AT5G22870.1

MCHKPKLELMPMETSPAQLRRPSLICIFLVILTIFMAAVGFLITWLETKPKKLRYTVENASVQNFNLNDNH  
MSATFQFTIQSHNPNHRISVYSSVEIFVKFKDQTLAFDTEPFHQPRMNVKQIDETLIAENVAVSKSNGKDLRS  
QNSLGKIGFEVFKARVRFKVGIVKSSHRTAKIKCSHVTVSLSQPNKSQNSSCDADI

>AT5G36970.1

MSDHQKIHPVSDPEAPPHTAPLVPRGSSRSEHGDPTKTQQAAPLDPPREKKGSRSCWCRCVCYTLVLVFLLLIVI  
VGAIVGILYLVFRPKFPDYNIDRLQLTRFQLNQDLSLSTAFNVITAKNPNEKIGIYYEDGSKISVLYMQTRISNGSL  
PKFYQGHENTTIILVEMTGFTQATSLMNTLQEQQLTGSIPLRIRVTQPVRIKLGKLLMKVRFVRCGVSVDLSL  
AANSVIRVRSSNCKYRFRL

>AT5G45320.1

MPRLTSRHGTSPFIWCAAIIICAIISIVVIVGGIIVFVGYLVIHPRVPIISVADAHLDLFLKYDIVGVLQTQLTIVIRVEND  
NAKAHALFDETEFKLSYEGKPIAILKAPEFEVVEKESMFLPYLVQSYPIPLNPTMMQAVDYAVKKDVITFELKGGG  
RTRWRVGPLGSVKFECNLSCQLRFRPSDHSYIPSPCTSAHKH

>AT5G53730.1

MSQISITSPKHCAKGGGININNRHKKLFFTFSTFFSGLLLIIFLVWLILHPPERPEFSLTEADIYSLNLTTSSTHLLNSSV  
QLTLFSKNPNKKVGIYYDKLLVYAAARGQQITSEASLPPFYQSHEEINLLTAFLQGTLPVAQSFQYQISRERSTGKII  
IGMKMDGKLRWKIGTWVSGAYRFNVNCLAIVAFGMNMTTPPLASLQGTRCSTTI

>glycine-rich uncharacterized protein

MAKPHDRRRSSGRTNLASCAVATVFLILLVLLVYFTVFKPKDPKISVNAVQLPSFAVSNNTANFSSQYVAVR  
NPNRAVFSHYDSSIQLLYSGNQVGFMFIPAGKIDSGRIQYMAATFTVHSFPISPPSSSAISTVSAAVIPDSPIIPGPP  
DFTVTPRNPDSYFPGYPESDLPGNPGSPDFSGNPGPPSFPRNPGSPEFPGNPGAPIIPRNPGSPEFPINPPRN  
PGAPVIPRNPNPVFPGNPRSMGPPGFPGIGGPPGFPPTFGGGGTGPTLGDGYANPGFGYGNRVGPTM  
EIESKMELAGRVKVLHVFTHHVAKSDCRVTVSIADGSVLGFHC

**Table S5.** The mutants selection of four homologous genes of *GmSYP24*.

| gene name                     | mutant name | insertion type         | Amplification primers                                    | expression level               |
|-------------------------------|-------------|------------------------|----------------------------------------------------------|--------------------------------|
| AT2G35460                     | SALK_064143 | exon insertion         | LP AGGGTGGTGGCTTAGATATCG;<br>RP CGTGCCAATCTACATCTCTCC    | downregulated 6.4 times        |
|                               | SALK_069015 | promoter insertion     | LP ACAAACCAAGGCACTTCTACG;<br>RP CTGAGTCAGACCCAGCAAAAG    | upregulated 16.4 times         |
|                               | SALK_073333 | exon insertion         | LP GAACCAAGACCAACCTATGCC;<br>RP TTCACGTCGATCCTGTAAACC    | downregulated 2.4 times        |
|                               | SALK_106063 | exon insertion         | LP TGATATTCTCCTTGGGTTCCC;<br>RP CGTGCCAATCTACATCTCTCC    | upregulated 24.5 times         |
| AT3G11650                     | SALK_008804 | promoter insertion     | LPTTTAGTGTAGTTCCATGAAACTAGGG;<br>RPATGAGGATGTTGCAGATCAGG | upregulated 3.2 times          |
|                               | SALK_129820 | promoter insertion     | LPTGAGAAACCTAACTTTGGATTTCAC;<br>RP TATAGCTGCGGTGAGCCTTAG | upregulated 11.5 times         |
| AT5G06320                     | SALK_150318 | exon insertion         | LPGAGACGTCAGAAAACCTCCGTG;<br>RPAACTCACCGAATTCACACTCG     | downregulated 2.6 times        |
|                               | SALK_035427 | exon insertion         | LPTCTCTGATGGACATCCTGACC;<br>RP:AACTCACCGAATTCACACTCG     | downregulated 1.4 times        |
| AT2G35980                     | CS423587    | exon insertion         | LPCATCGTCCTGATCTGCTTAGG;<br>RPCTCCCAAAGGCTACTACCGAC      | No homozygous transgenic lines |
|                               | SALK_132320 | unknown insertion site | LPAGTCTACGACGCTGAGCTGAC;<br>RPCTGAAACTCTTTCAACGCTGC      | No homozygous transgenic lines |
| LBPrimer: ATTTTGCCGATTTCGGAAC |             |                        |                                                          |                                |

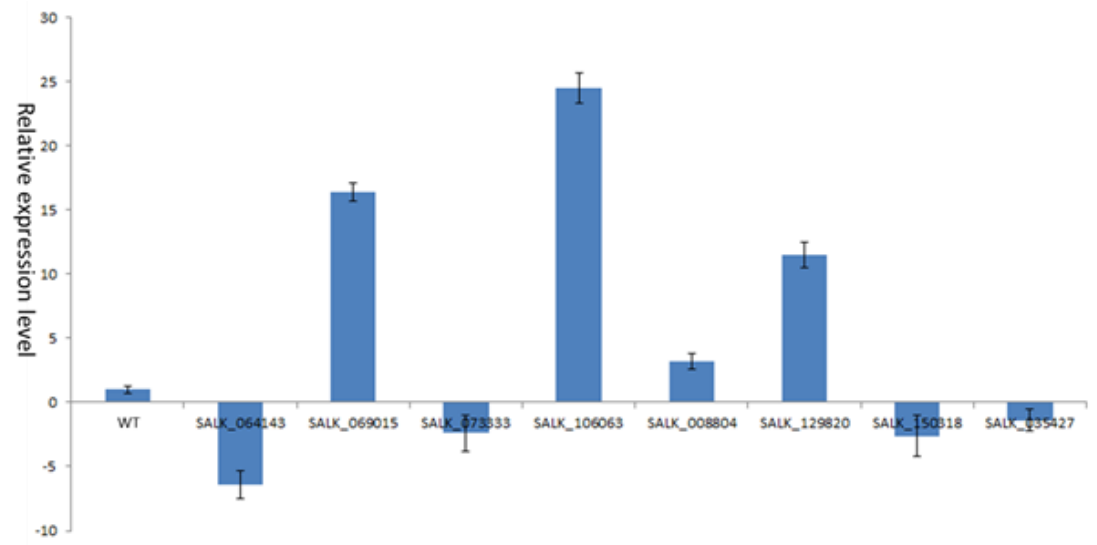

**Table S6.** Genes that were up-regulated in the GmSYP24ox transgenic plants under drought.

| Locus                      | log2.Fold_change. | P-value    | Q-value    | Blast swissprot                                                                                                               |
|----------------------------|-------------------|------------|------------|-------------------------------------------------------------------------------------------------------------------------------|
| Glyma.01G015400.Wm82.a2.v1 | 2.2027            | 1.4076E-07 | 7.7824E-06 | unknown                                                                                                                       |
| Glyma.01G023300.Wm82.a2.v1 | 1.7189            | 9.05E-07   | 2.08E-05   | sp Q8W486 Y1491_ARATH Uncharacterized protein At1g04910 OS=Arabidopsis thaliana GN=At1g04910 PE=2 SV=1//2.97641e-83           |
| Glyma.01G126600.Wm82.a2.v1 | 3.5778            | 1.55E-31   | 2.54E-29   | sp Q9C523 DIR19_ARATH Dirigent protein 19 OS=Arabidopsis thaliana GN=DIR19 PE=2 SV=1//5.46253e-61                             |
| Glyma.01G127200.Wm82.a2.v1 | 2.444             | 4.15E-64   | 1.67E-61   | sp Q9FI66 DIR3_ARATH Dirigent protein 3 OS=Arabidopsis thaliana GN=DIR3 PE=3 SV=1//1.68406e-49                                |
| Glyma.01G185800.Wm82.a2.v1 | 1.3681            | 0.00011231 | 0.0034201  | sp P22335 HSF24_SOLPE Heat shock factor protein HSF24 OS=Solanum peruvianum GN=HSF24 PE=2 SV=1//2.27036e-80                   |
| Glyma.01G228700.Wm82.a2.v1 | 1.5952            | 5.47E-54   | 1.88E-51   | sp P30081 CHS7_SOYBN Chalcone synthase 7 OS=Glycine max GN=CHS7 PE=3 SV=1//0                                                  |
| Glyma.01G232400.Wm82.a2.v1 | 1.7658            | 1.66E-11   | 7.50E-10   | sp P31687 4CL2_SOYBN 4-coumarate--CoA ligase 2 OS=Glycine max PE=2 SV=2//0                                                    |
| Glyma.02G208400.Wm82.a2.v1 | 1.4087            | 1.39E-19   | 1.22E-17   | sp P27608 AROF_TOBAC Phospho-2-dehydro-3-deoxyheptonate aldolase 1, chloroplastic OS=Nicotianatabacum GN=DHAPS-1 PE=2 SV=1//0 |
| Glyma.03G174300.Wm82.a2.v1 | 1.8271            | 6.00E-08   | 3.47E-06   | sp Q9LZD3 E70A1_ARATH Exocyst complex component EXO70A1 OS=Arabidopsis thaliana GN=EXO70A1 PE=1 SV=1//3.9145e-68              |

|                            |        |           |            |                                                                                                                                                                     |
|----------------------------|--------|-----------|------------|---------------------------------------------------------------------------------------------------------------------------------------------------------------------|
| Glyma.03G213300.Wm82.a2.v1 | 6.3721 | 8.55E-11  | 7.37E-09   | sp O82245 TSPO_ARATH Translocator protein homolog OS=Arabidopsis thaliana GN=TSPO PE=1 SV=1//2.54929e-44                                                            |
| Glyma.04G050300.Wm82.a2.v1 | 1.5345 | 4.81E-06  | 0.00020339 | sp Q9FU27 C3H2_ORYSJ Zinc finger CCCH domain-containing protein 2 OS=Oryza sativa subsp. japonica GN=Os01g0192000 PE=2 SV=1//1.22277e-61                            |
| Glyma.04G089700.Wm82.a2.v1 | 1.7043 | 8.67E-11  | 7.43E-09   | sp Q9T074 PCKA_ARATH Phosphoenolpyruvate carboxykinase [ATP] OS=Arabidopsis thaliana GN=PCKA PE=1 SV=1//0                                                           |
| Glyma.04G104200.Wm82.a2.v1 | 1.9169 | 6.64E-06  | 0.00026914 | sp Q9Y7K5 YGI3_SCHPO Uncharacterized WD repeat-containing protein C2A9.03 OS=Schizosaccharomycespombe (strain 972/ ATCC 24843) GN=SPBC2A9.03 PE=3 SV=2//2.58827e-38 |
| Glyma.05G044200.Wm82.a2.v1 | 1.2521 | 8.28E-06  | 0.00033017 | sp Q53EL6 PDCD4_HUMAN Programmed cell death protein 4 OS=Homo sapiens GN=PDCD4 PE=1 SV=2//4.99051e-26                                                               |
| Glyma.05G056300.Wm82.a2.v1 | 2.8705 | 5.76E-59  | 3.99E-56   | sp P29001 INVA_VIGRR Acid beta-fructofuranosidase OS=Vignaradiata var. radiata GN=INVA PE=1 SV=1//0                                                                 |
| Glyma.05G180100.Wm82.a2.v1 | 1.8907 | 4.48E-17  | 6.31E-15   | sp O65201 ACOX2_ARATH Acyl-coenzyme A oxidase 2, peroxisomal OS=Arabidopsis thaliana GN=ACX2 PE=1 SV=2//0                                                           |
| Glyma.06G021200.Wm82.a2.v1 | 5.2677 | 1.13E-115 | 2.16E-112  | sp Q0JIL1 NRX2_ORYSJ Probable nucleoredoxin 2 OS=Oryza sativa subsp. japonica GN=Os01g0794400 PE=2 SV=1//1.57959e-114                                               |
| Glyma.06G059600.Wm82.a2.v1 | 1.2725 | 1.36E-25  | 3.43E-23   | sp Q940T9 COL4_ARATH Zinc finger protein CONSTANS-LIKE 4 OS=Arabidopsis thaliana                                                                                    |

|                            |        |          |            |                                                                                                                                                                      |
|----------------------------|--------|----------|------------|----------------------------------------------------------------------------------------------------------------------------------------------------------------------|
|                            |        |          |            | GN=COL4 PE=2 SV=2//5.89374e-93                                                                                                                                       |
| Glyma.06G105200.Wm82.a2.v1 | 3.4919 | 5.25E-09 | 3.50E-07   | sp Q9Y7K5 YGI3_SCHPO Uncharacterized WD repeat-containing protein C2A9.03 OS=Schizosaccharomycespombe (strain 972 / ATCC 24843) GN=SPBC2A9.03 PE=3 SV=2//1.32105e-38 |
| Glyma.06G216700.Wm82.a2.v1 | 1.6107 | 2.45E-09 | 1.75E-07   | sp Q94A82 NUD19_ARATH Nudix hydrolase 19, chloroplastic OS=Arabidopsis thaliana GN=NUDT19 PE=1 SV=1//0                                                               |
| Glyma.06G239900.Wm82.a2.v1 | 1.9392 | 6.81E-47 | 3.70E-44   | sp Q9T076 ENL2_ARATH Early nodulin-like protein 2 OS=Arabidopsis thaliana GN=At4g27520 PE=1 SV=1//1.22676e-40                                                        |
| Glyma.07G126800.Wm82.a2.v1 | 1.7026 | 5.75E-06 | 0.00023712 | sp O82199 C3H20_ARATH Zinc finger CCCH domain-containing protein 20 OS=Arabidopsis thaliana GN=At2g19810 PE=2 SV=1//1.47867e-130                                     |
| Glyma.07G261500.Wm82.a2.v1 | 4.8253 | 2.20E-47 | 6.18E-45   | sp P92980 APR3_ARATH 5'-adenylylsulfate reductase 3, chloroplastic OS=Arabidopsis thaliana GN=APR3 PE=2 SV=2//0                                                      |
| Glyma.08G056600.Wm82.a2.v1 | 6.1673 | 3.13E-09 | 2.17E-07   | sp Q9C942 CSE_ARATH Caffeoylshikimate esterase OS=Arabidopsis thaliana GN=CSE PE=1 SV=1//8.87112e-34                                                                 |
| Glyma.09G010500.Wm82.a2.v1 | 2.291  | 1.91E-14 | 2.25E-12   | unknown                                                                                                                                                              |
| Glyma.09G069800.Wm82.a2.v1 | 1.2887 | 4.74E-37 | 1.93E-34   | sp Q8RWQ9 ALEUL_ARATH Thiol protease aleurain-like OS=Arabidopsis thaliana GN=At3g45310 PE=2 SV=1//7.6746e-178                                                       |
| Glyma.09G173300.Wm82.a2.v1 | 2.3094 | 6.58E-05 | 0.002114   | unknown                                                                                                                                                              |
| Glyma.09G190600.Wm82.a2.v1 | 2.1601 | 2.60E-20 | 4.51E-18   | sp Q9LV52 HSFC1_ARATH Heat stress transcription                                                                                                                      |

|                            |        |          |            |                                                                                                                                  |
|----------------------------|--------|----------|------------|----------------------------------------------------------------------------------------------------------------------------------|
|                            |        |          |            | factor C-1 OS=Arabidopsis thaliana GN=HSFC1 PE=2 SV=1//1.19541e-70                                                               |
| Glyma.09G199000.Wm82.a2.v1 | 1.5502 | 1.39E-17 | 2.05E-15   | sp Q8W486 Y1491_ARATH Uncharacterized protein At1g04910 OS=Arabidopsis thaliana GN=At1g04910 PE=2 SV=1//2.47287e-83              |
| Glyma.09G205700.Wm82.a2.v1 | 2.2597 | 4.26E-08 | 1.22E-06   | sp Q500U8 TKPR1_ARATH Tetraketide alpha-pyrone reductase 1 OS=Arabidopsis thaliana GN=TKPR1 PE=1 SV=1//1.00335e-34               |
| Glyma.09G269600.Wm82.a2.v1 | 1.8934 | 2.60E-06 | 5.49E-05   | sp Q40316 VESTR_MEDSA Vestitone reductase OS=Medicago sativa PE=1 SV=1//4.14286e-173                                             |
| Glyma.10G001700.Wm82.a2.v1 | 2.8948 | 3.19E-89 | 4.14E-86   | sp Q9XIW0 CIPK7_ARATH CBL-interacting serine/threonine-protein kinase 7 OS=Arabidopsis thaliana GN=CIPK7 PE=1 SV=1//4.03366e-150 |
| Glyma.10G291400.Wm82.a2.v1 | 1.1681 | 1.53E-06 | 3.37E-05   | sp Q9C942 CSE_ARATH Caffeoylshikimate esterase OS=Arabidopsis thaliana GN=CSE PE=1 SV=1//4.32716e-49                             |
| Glyma.11G010500.Wm82.a2.v1 | 1.4475 | 1.45E-05 | 0.00025842 | sp P31687 4CL2_SOYBN 4-coumarate--CoA ligase 2 OS=Glycine max PE=2 SV=2//0                                                       |
| Glyma.11G011500.Wm82.a2.v1 | 1.5424 | 2.81E-46 | 7.52E-44   | sp P23569 CHSY_PUEML Chalcone synthase OS=Puerariamontana var. lobata GN=CHS PE=2 SV=1//0                                        |
| Glyma.11G063600.Wm82.a2.v1 | 3.3452 | 1.78E-08 | 1.11E-06   | sp Q9SYY4 ELO3L_ARATH Elongation of fatty acids protein 3-like OS=Arabidopsis thaliana GN=HOS3 PE=2 SV=1//6.67054e-118           |
| Glyma.11G070500.Wm82.a2.v1 | 3.4429 | 8.37E-13 | 4.30E-11   | sp P52575 IFR_MEDSA Isoflavone reductase OS=Medicago sativa GN=IFR PE=1 SV=1//0                                                  |



|                            |        |            |            |                                                                                                                                  |
|----------------------------|--------|------------|------------|----------------------------------------------------------------------------------------------------------------------------------|
| Glyma.11G119500.Wm82.a2.v1 | 1.4381 | 3.36E-07   | 8.35E-06   | sp Q8VZ80 PLT5_ARATH Polyol transporter 5<br>OS=Arabidopsis thaliana GN=PLT5 PE=1 SV=2//0                                        |
| Glyma.11G208700.Wm82.a2.v1 | 1.1571 | 5.10E-05   | 0.0016717  | unknown                                                                                                                          |
| Glyma.12G117000.Wm82.a2.v1 | 2.1039 | 1.20E-10   | 1.02E-08   | sp Q9FE67 ERF80_ARATH Ethylene-responsive<br>transcription factor 9 OS=Arabidopsis thaliana<br>GN=ERF9 PE=2 SV=1//7.38365e-29    |
| Glyma.12G134300.Wm82.a2.v1 | 1.9234 | 0.00015715 | 0.0045974  | unknown                                                                                                                          |
| Glyma.13G145000.Wm82.a2.v1 | 1.2321 | 8.23E-17   | 5.84E-15   | sp P19142 PAL2_PHAVU Phenylalanine ammonia-lyase<br>class 2 OS=Phaseolus vulgaris PE=3 SV=1//0                                   |
| Glyma.13G360600.Wm82.a2.v1 | 1.2766 | 1.34E-05   | 0.00050859 | sp Q9M8L2 FBK30_ARATH F-box/kelch-repeat protein<br>At1g80440 OS=Arabidopsis thaliana GN=At1g80440<br>PE=2 SV=1//6.28671e-123    |
| Glyma.14G010500.Wm82.a2.v1 | 2.5757 | 2.96E-17   | 4.27E-15   | sp Q84VX0 RFS1_ARATH Probable galactinol--sucrose<br>galactosyltransferase 1 OS=Arabidopsis thaliana<br>GN=RFS1 PE=2 SV=1//0     |
| Glyma.14G038200.Wm82.a2.v1 | 1.3152 | 8.78E-07   | 4.23E-05   | sp Q06445 CYTI_VIGUN Cysteine proteinase inhibitor<br>OS=Vignaunguiculata PE=3 SV=1//6.14795e-42                                 |
| Glyma.14G087600.Wm82.a2.v1 | 2.3909 | 2.12E-06   | 9.62E-05   | sp Q9STX1 ACBP3_ARATH Acyl-CoA-binding<br>domain-containing protein 3 OS=Arabidopsis thaliana<br>GN=ACBP3 PE=1 SV=1//3.08907e-32 |
| Glyma.15G072400.Wm82.a2.v1 | 2.9506 | 7.98E-19   | 1.27E-16   | sp P24805 TSJT1_TOBAC Stem-specific protein TSJT1<br>OS=Nicotianatabacum GN=TSJT1 PE=2<br>SV=1//2.56932e-32                      |
| Glyma.16G100400.Wm82.a2.v1 | 2.5454 | 6.16E-30   | 1.92E-27   | sp A3FPF2 DEF_NELNU Defensin-like protein<br>OS=Nelumbonucifera PE=3 SV=1//3.46437e-14                                           |
| Glyma.17G034900.Wm82.a2.v1 | 4.633  | 5.36E-103  | 4.84E-100  | sp Q9NZT1 CALL5_HUMAN Calmodulin-like protein 5                                                                                  |

|                            |        |          |            |                                                                                                                                      |
|----------------------------|--------|----------|------------|--------------------------------------------------------------------------------------------------------------------------------------|
|                            |        |          |            | OS=Homo sapiens GN=CALML5 PE=1 SV=2//1.53851e-13                                                                                     |
| Glyma.17G096700.Wm82.a2.v1 | 1.4622 | 1.27E-22 | 2.61E-20   | sp Q02283 HAT5_ARATH Homeobox-leucine zipper protein HAT5 OS=Arabidopsis thaliana GN=HAT5 PE=1 SV=1//9.02554e-41                     |
| Glyma.17G235300.Wm82.a2.v1 | 1.6879 | 1.59E-16 | 2.11E-14   | sp J9U5U9 DAD2_PETHY Probable strigolactone esterase DAD2 OS=Petunia hybrida GN=DAD2 PE=1 SV=1//1.42839e-159                         |
| Glyma.18G009700.Wm82.a2.v1 | 1.02   | 1.68E-28 | 2.33E-26   | sp Q7FAH2 G3PC2_ORYSJ<br>Glyceraldehyde-3-phosphate dehydrogenase 2, cytosolic OS=Oryza sativa subsp. japonica GN=GAPC2 PE=1 SV=1//0 |
| Glyma.18G061100.Wm82.a2.v1 | 3.9037 | 0        | 0          | sp P49093 ASNS2_LOTJA Asparagine synthetase [glutamine-hydrolyzing] 2 OS=Lotus japonicus GN=AS2 PE=2 SV=2//0                         |
| Glyma.18G193400.Wm82.a2.v1 | 1.8893 | 4.58E-08 | 1.31E-06   | sp Q9SR40 LAC7_ARATH Laccase-7 OS=Arabidopsis thaliana GN=LAC7 PE=2 SV=1//0                                                          |
| Glyma.19G076500.Wm82.a2.v1 | 3.5398 | 8.84E-06 | 0.00034992 | unknown                                                                                                                              |
| Glyma.19G089800.Wm82.a2.v1 | 2.2837 | 3.22E-38 | 1.39E-35   | sp P92941 CLCA_ARATH Chloride channel protein CLC-a OS=Arabidopsis thaliana GN=CLC-A PE=1 SV=2//0                                    |
| Glyma.19G099400.Wm82.a2.v1 | 1.1542 | 4.22E-05 | 0.0014111  | sp Q9LW26 Y3684_ARATH Acyltransferase-like protein At3g26840, chloroplastic OS=Arabidopsis thaliana GN=At3g26840 PE=2 SV=1//0        |
| Glyma.19G125300.Wm82.a2.v1 | 1.2203 | 1.84E-05 | 0.00067755 | sp O80683 CAB25_ARATH Calmodulin-binding protein 25 OS=Arabidopsis thaliana GN=CAMBP25 PE=1                                          |

|                            |        |            |           |                                                                                            |
|----------------------------|--------|------------|-----------|--------------------------------------------------------------------------------------------|
|                            |        |            |           | SV=1//2.72625e-22                                                                          |
| Glyma.19G198600.Wm82.a2.v1 | 2.8398 | 3.65E-213  | 1.08E-209 | sp Q9SJ52 YLS9_ARATH Protein YLS9 OS= Arabidopsis thaliana GN=YLS9 PE=2 SV= 1//2.36052e-62 |
| Glyma.19G217700.Wm82.a2.v1 | 4.7525 | 1.38E-06   | 6.44E-05  | sp Q93XK2 STSYN_PEA Stachyose synthase OS= Pisumsativum GN=STS1 PE=1 SV=1//0               |
| Glyma.19G245400.Wm82.a2.v1 | 3.3694 | 9.67E-08   | 2.64E-06  | sp P02877 HEVE_HEVBR Pro-hevein OS= Hevea-brasiliensis GN=HEV1 PE=1 SV= 2//3.75062e-99     |
| Glyma.20G135200.Wm82.a2.v1 | 1.5041 | 1.37E-10   | 5.49E-09  | unknown                                                                                    |
| Glyma.20G158400.Wm82.a2.v1 | 1.9212 | 0.00016959 | 0.0048902 | unknown                                                                                    |

**Table S8.** Genes that were up-regulated in the GmSYP24ox transgenic plants under ABA.

| Locus                      | log2.Fold_change | P-value   | Q-value   | Blast swissprot                                                                                                                       |
|----------------------------|------------------|-----------|-----------|---------------------------------------------------------------------------------------------------------------------------------------|
| Glyma.01G006000.Wm82.a2.v1 | 1.6235           | 0.000451  | 0.0045645 | unknown                                                                                                                               |
| Glyma.01G115900.Wm82.a2.v1 | 1.5826           | 1.76E-124 | 1.37E-121 | sp Q9XF88 CB4B_ARATH Chlorophyll a-b binding protein CP29.2, chloroplastic OS=Arabidopsis thaliana GN=LHCB4.2 PE=1 SV=1//3.49966e-165 |
| Glyma.02G213700.Wm82.a2.v1 | 3.3283           | 4.45E-19  | 3.04E-17  | sp Q94CE3 BCA5_ARATH Beta carbonic anhydrase 5, chloroplastic OS=Arabidopsis thaliana GN=BCA5 PE=2 SV=1//2.9914e-97                   |
| Glyma.04G020300.Wm82.a2.v1 | 1.3446           | 6.09E-104 | 3.42E-101 | sp P17340 PLAS_SOLLC Plastocyanin, chloroplastic OS=Solanum lycopersicum GN=PETE PE=2 SV=1//1.86003e-69                               |
| Glyma.04G118700.Wm82.a2.v1 | 2.5952           | 1.86E-15  | 9.58E-14  | sp P17407 21KD_DAUCA 21 kDa protein OS=Daucuscarota PE=2 SV=1//7.00889e-71                                                            |
| Glyma.04G179500.Wm82.a2.v1 | 3.6466           | 2.41E-18  | 1.56E-16  | sp Q93X17 SNAK2_SOLTU Snakin-2 OS=Solanum tuberosum GN=SN2 PE=1 SV=1//3.43079e-22                                                     |
| Glyma.05G168400.Wm82.a2.v1 | 2.1553           | 1.10E-79  | 4.37E-77  | sp Q9ZTS2 FER_CAPAN Ferredoxin, chloroplastic OS=Capsicum annuum GN=AP1 PE=1 SV=1//3.53401e-71                                        |
| Glyma.05G218400.Wm82.a2.v1 | 1.6683           | 5.64E-28  | 6.29E-26  | sp Q9FLE8 Y5986_ARATH Uncharacterized protein At5g39865 OS=Arabidopsis thaliana GN=At5g39865 PE=2 SV=1//1.12827e-26                   |
| Glyma.05G224500.Wm82.a2.v1 | 4.1785           | 3.41E-07  | 6.84E-06  | sp Q8H1S0 MIOX4_ARATH Inositol oxygenase 4 OS=Arabidopsis thaliana GN=MIOX4 PE=2 SV=1//7.88763e-179                                   |
| Glyma.06G050100.Wm82.a2.v1 | 4.3766           | 8.92E-05  | 0.001091  | sp Q9M439 BCAT2_ARATH                                                                                                                 |

|                            |        |           |           |                                                                                                                                |
|----------------------------|--------|-----------|-----------|--------------------------------------------------------------------------------------------------------------------------------|
|                            |        |           |           | Branched-chain-amino-acid aminotransferase 2, chloroplastic OS=Arabidopsis thaliana GN=BCAT2 PE=1 SV=1//6.11164e-166           |
| Glyma.06G102100.Wm82.a2.v1 | 3.2377 | 2.67E-50  | 5.85E-48  | sp Q9ZPE7 EXO_ARATH Protein EXORDIUM OS=Arabidopsis thaliana GN=EXO PE=2 SV=1//3.98167e-140                                    |
| Glyma.06G117200.Wm82.a2.v1 | 3.7351 | 3.97E-28  | 4.47E-26  | sp Q0WPW4 ACCO5_ARATH 1-aminocyclopropane-1-carboxylate oxidase 5 OS=Arabidopsis thaliana GN=At1g77330 PE=2 SV=1//8.60588e-159 |
| Glyma.06G121100.Wm82.a2.v1 | 2.6421 | 3.17E-06  | 5.33E-05  | sp P00303 BABL_CUCSA Basic blue protein OS=Cucumis sativus PE=1 SV=1//6.00089e-48                                              |
| Glyma.06G185300.Wm82.a2.v1 | 2.6502 | 8.36E-50  | 1.77E-47  | sp Q93X17 SNAK2_SOLTU Snakin-2 OS=Solanum tuberosum GN=SN2 PE=1 SV=1//1.98791e-22                                              |
| Glyma.07G125600.Wm82.a2.v1 | 2.1205 | 1.39E-07  | 2.97E-06  | unknown                                                                                                                        |
| Glyma.07G150400.Wm82.a2.v1 | 3.7216 | 4.92E-144 | 4.56E-141 | sp Q9SRM5 CPR49_ARATH GDSL esterase/lipase CPRD49 OS=Arabidopsis thaliana GN=CPRD49 PE=2 SV=1//1.65434e-91                     |
| Glyma.08G152500.Wm82.a2.v1 | 1.0563 | 7.67E-08  | 6.03E-06  | sp Q66GR3 BH130_ARATH Transcription factor bHLH130 OS=Arabidopsis thaliana GN=BHLH130 PE=1 SV=1//5.36096e-38                   |
| Glyma.08G171000.Wm82.a2.v1 | 3.8824 | 6.56E-23  | 5.55E-21  | unknown                                                                                                                        |
| Glyma.08G200100.Wm82.a2.v1 | 2.9297 | 9.84E-202 | 1.45E-198 | sp P10743 VSPB_SOYBN Stem 31 kDa glycoprotein OS=Glycine max GN=VSPB PE=2 SV=1//0                                              |
| Glyma.09G005700.Wm82.a2.v1 | 1.6272 | 5.01E-11  | 5.90E-09  | sp Q9C519 WRKY6_ARATH WRKY transcription factor 6 OS=Arabidopsis thaliana GN=WRKY6 PE=1                                        |

|                            |        |           |            |                                                                                                                                                     |
|----------------------------|--------|-----------|------------|-----------------------------------------------------------------------------------------------------------------------------------------------------|
|                            |        |           |            | SV=1//5.28188e-122                                                                                                                                  |
| Glyma.09G089700.Wm82.a2.v1 | 1.3209 | 1.15E-12  | 1.66E-10   | sp Q93VD3 CIPKN_ARATH CBL-interacting serine/threonine-protein kinase 23 OS=Arabidopsis thaliana GN=CIPK23 PE=1 SV=1//0                             |
| Glyma.10G200700.Wm82.a2.v1 | 1.5059 | 4.85E-08  | 3.90E-06   | sp Q84WB7 GT645_ARATH Glycosyltransferase family protein 64 protein C5 OS=Arabidopsis thaliana GN=At5g04500 PE=2 SV=1//0                            |
| Glyma.11G088600.Wm82.a2.v1 | 2.058  | 4.28E-09  | 1.17E-07   | sp O14197 YDQ4_SCHPO Uncharacterized transporter C5D6.04 OS=Schizosaccharomycespombe (strain 972 / ATCC 24843) GN=SPAC5D6.04 PE=3 SV=1//2.83664e-06 |
| Glyma.11G207500.Wm82.a2.v1 | 1.7387 | 1.94E-06  | 0.00011766 | sp Q9CAL3 CRK2_ARATH Cysteine-rich receptor-like protein kinase 2 OS=Arabidopsis thaliana GN=CRK2 PE=2 SV=1//2.1279e-108                            |
| Glyma.13G212600.Wm82.a2.v1 | 2.593  | 5.59E-14  | 2.59E-12   | sp Q8RXC8 RBK2_ARATH Receptor-like cytosolic serine/threonine-protein kinase RBK2 OS=Arabidopsis thaliana GN=RBK2 PE=1 SV=1//3.78835e-156           |
| Glyma.14G086300.Wm82.a2.v1 | 2.3803 | 1.30E-286 | 3.99E-283  | sp Q8GXG1 ASPG_B_ARATH Probable isoaspartyl peptidase/L-asparaginase 2 OS=Arabidopsis thaliana GN=At3g16150 PE=2 SV=2//0                            |
| Glyma.14G087200.Wm82.a2.v1 | 2.8531 | 7.43E-43  | 1.33E-40   | sp Q948Z4 SNAK1_SOLTU Snakin-1 OS=Solanum tuberosum GN=SN1 PE=1 SV=1//5.29715e-31                                                                   |
| Glyma.14G093100.Wm82.a2.v1 | 1.1126 | 3.75E-15  | 6.99E-13   | sp P43399 MT1_TRIRP Metallothionein-like protein 1 OS=Trifoliumrepens GN=MT1B PE=3 SV=1//1.07989e-13                                                |
| Glyma.14G220000.Wm82.a2.v1 | 1.6715 | 3.33E-10  | 1.06E-08   | sp B6ETT4 SYT2_ARATH Synaptotagmin-2                                                                                                                |

|                            |        |          |            |                                                                                                                                        |
|----------------------------|--------|----------|------------|----------------------------------------------------------------------------------------------------------------------------------------|
|                            |        |          |            | OS=Arabidopsis thaliana GN=SYT2 PE=2 SV=1//0                                                                                           |
| Glyma.15G072400.Wm82.a2.v1 | 2.9329 | 1.03E-17 | 6.42E-16   | sp P24805 TSJT1_TOBAC Stem-specific protein TSJT1<br>OS=Nicotianatabacum GN=TSJT1 PE=2<br>SV=1//2.56932e-32                            |
| Glyma.15G110300.Wm82.a2.v1 | 1.2815 | 2.83E-06 | 0.00016449 | sp Q9C519 WRKY6_ARATH WRKY transcription<br>factor 6 OS=Arabidopsis thaliana GN=WRKY6 PE=1<br>SV=1//2.29689e-126                       |
| Glyma.16G173000.Wm82.a2.v1 | 2.8834 | 5.88E-09 | 5.28E-07   | sp P36908 CHIA_CICAR Acidic endochitinase<br>OS=Cicer arietinum PE=2 SV=1//2.03516e-138                                                |
| Glyma.16G205200.Wm82.a2.v1 | 1.542  | 4.37E-74 | 1.53E-71   | sp Q9XF89 CB5_ARATH Chlorophyll a-b binding<br>protein CP26, chloroplastic OS=Arabidopsis thaliana<br>GN=LHCB5 PE=1 SV=1//5.02959e-141 |
| Glyma.17G237100.Wm82.a2.v1 | 3.0164 | 1.24E-62 | 3.50E-60   | sp Q948Z4 SNAK1_SOLTU Snakin-1 OS=Solanum<br>tuberosum GN=SN1 PE=1 SV=1//1.19277e-25                                                   |
| Glyma.18G259400.Wm82.a2.v1 | 2.2789 | 1.13E-07 | 2.45E-06   | sp P46690 GASA4_ARATH Gibberellin-regulated<br>protein 4 OS=Arabidopsis thaliana GN=GASA4 PE=1<br>SV=2//1.72057e-37                    |
| Glyma.19G147400.Wm82.a2.v1 | 2.0514 | 6.18E-44 | 1.17E-41   | sp P48631 FD6E2_SOYBN Omega-6 fatty acid<br>desaturase, endoplasmic reticulum isozyme 2<br>OS=Glycine max GN=FAD2-2 PE=2 SV=1//0       |
| Glyma.20G027200.Wm82.a2.v1 | 2.1882 | 1.62E-53 | 3.83E-51   | unknown                                                                                                                                |
| Glyma.20G167500.Wm82.a2.v1 | 3.1219 | 2.25E-21 | 1.76E-19   | unknown                                                                                                                                |

**Table S9** The expression level of aquaporins in the GmSYP24ox transgenic line under osmotic/drought, salt or ABA stress.

| S24N1L vs S24L             |                   |               |               |                                                                                                           |
|----------------------------|-------------------|---------------|---------------|-----------------------------------------------------------------------------------------------------------|
| Locus                      | log2.Fold_change. | pvalue        | qvalue        | Blast swiss prot                                                                                          |
| Glyma.19G181300.Wm82.a2.v1 | -1.8936           | 3.12E-31      | 1.09E-29      | sp P43286 PIP21_ARATH Aquaporin PIP2-1 OS=Arabidopsis thaliana GN=PIP2-1 PE=1 SV=1//1.21882e-159          |
| Glyma.03G078700.Wm82.a2.v1 | -1.5052           | 2.96E-05      | 0.000161<br>2 | sp Q39196 PIP14_ARATH Probable aquaporin PIP1-4 OS=Arabidopsis thaliana GN=PIP1.4 PE=1 SV=1//0            |
| Glyma.03G180900.Wm82.a2.v1 | 5.659             | 7.52E-06      | 4.52E-05      | sp Q9ATM4 PIP27_MAIZE Aquaporin PIP2-7 OS=Zea mays GN=PIP2-7 PE=2 SV=1//7.13148e-158                      |
| Glyma.12G075400.Wm82.a2.v1 | -3.3361           | 6.17E-17      | 1.14E-15      | sp Q9ATM4 PIP27_MAIZE Aquaporin PIP2-7 OS=Zea mays GN=PIP2-7 PE=2 SV=1//7.87722e-176                      |
| Glyma.12G172500.Wm82.a2.v1 | 2.2324            | 1.60E-35      | 6.52E-34      | sp Q9ATM4 PIP27_MAIZE Aquaporin PIP2-7 OS=Zea mays GN=PIP2-7 PE=2 SV=1//0                                 |
| Glyma.01G208200.Wm82.a2.v1 | -2.2134           | 0.001024<br>2 | 0.003951<br>5 | sp P21653 TIP1_TOBAC Probable aquaporin TIP-type RB7-5A OS=Nicotiana tabacum PE=2 SV=1//8.56123e-108      |
| Glyma.04G083200.Wm82.a2.v1 | -3.1633           | 1.23E-07      | 9.65E-07      | sp O82316 TIP41_ARATH Aquaporin TIP4-1 OS=Arabidopsis thaliana GN=TIP4-1 PE=2 SV=1//2.71385e-104          |
| Glyma.06G084600.Wm82.a2.v1 | -6.4231           | 5.57E-09      | 5.22E-08      | sp O82316 TIP41_ARATH Aquaporin TIP4-1 OS=Arabidopsis thaliana GN=TIP4-1 PE=2 SV=1//5.03132e-112          |
| Glyma.11G034000.Wm82.a2.v1 | -4.7633           | 1.79E-61      | 1.30E-59      | sp Q41975 TIP22_ARATH Probable aquaporin TIP2-2 OS=Arabidopsis thaliana GN=TIP2-2 PE=1 SV=2//1.28753e-108 |
| Glyma.12G023600.Wm82.a2.v1 | 2.612             | 0.000819<br>4 | 0.003240<br>1 | sp Q9ATL5 TIP42_MAIZE Aquaporin TIP4-2 OS=Zea mays GN=TIP4-2 PE=2 SV=1//1.41957e-16                       |
| Glyma.13G146300.Wm82.a2.v1 | -1.9586           | 1.21E-07      | 9.50E-07      | sp P25818 TIP11_ARATH Aquaporin TIP1-1 OS=Arabidopsis thaliana                                            |



|                            |                          |               |               |                                                                                                            |
|----------------------------|--------------------------|---------------|---------------|------------------------------------------------------------------------------------------------------------|
|                            |                          |               |               | GN=TIP1-1 PE=1 SV=1//3.98186e-100                                                                          |
| Glyma.13G224900.Wm82.a2.v1 | -3.8681                  | 3.57E-07      | 2.63E-06      | sp Q8LFP7 NIP12_ARATH Aquaporin NIP1-2 OS=Arabidopsis thaliana<br>GN=NIP1-2 PE=2 SV=2//2.31568e-131        |
| Glyma.16G210000.Wm82.a2.v1 | 6.1432                   | 9.63E-09      | 8.73E-08      | sp P23958 TIPA_PHAVU Probable aquaporin TIP-type alpha<br>OS=Phaseolus vulgaris PE=1 SV=1//1.5688e-132     |
| Glyma.19G186100.Wm82.a2.v1 | -1.4319                  | 8.73E-28      | 2.68E-26      | sp Q9FY14 TIP1_MEDTR Probable aquaporin TIP-type OS=Medicago<br>truncatula GN=AQP1 PE=1 SV=1//1.79911e-139 |
| <b>S24N2L vs S24L</b>      |                          |               |               |                                                                                                            |
| <b>Locus</b>               | <b>log2.Fold_change.</b> | <b>pvalue</b> | <b>qvalue</b> | <b>Blast swiss prot</b>                                                                                    |
| Glyma.03G078700.Wm82.a2.v1 | -2.7425                  | 1.31E-09      | 5.11E-09      | sp Q39196 PIP14_ARATH Probable aquaporin PIP1-4 OS=Arabidopsis<br>thaliana GN=PIP1.4 PE=1 SV=1//0          |
| Glyma.03G180900.Wm82.a2.v1 | 7.1414                   | 6.07E-10      | 2.46E-09      | sp Q9ATM4 PIP27_MAIZE Aquaporin PIP2-7 OS=Zea mays GN=PIP2-7<br>PE=2 SV=1//7.13148e-158                    |
| Glyma.10G211000.Wm82.a2.v1 | -2.0288                  | 2.78E-06      | 6.99E-06      | sp P43287 PIP22_ARATH Aquaporin PIP2-2 OS=Arabidopsis thaliana<br>GN=PIP2-2 PE=1 SV=2//3.46181e-175        |
| Glyma.11G228000.Wm82.a2.v1 | 3.6206                   | 0.002095<br>2 | 0.002938<br>9 | sp P25794 PIP2_PEA Probable aquaporin PIP-type 7a OS=Pisum<br>sativum GN=TRG-31 PE=2 SV=2//0               |
| Glyma.12G075400.Wm82.a2.v1 | -6.0915                  | 1.45E-19      | 1.20E-18      | sp Q9ATM4 PIP27_MAIZE Aquaporin PIP2-7 OS=Zea mays GN=PIP2-7<br>PE=2 SV=1//7.87722e-176                    |
| Glyma.12G172500.Wm82.a2.v1 | 2.7414                   | 1.10E-30      | 1.47E-29      | sp Q9ATM4 PIP27_MAIZE Aquaporin PIP2-7 OS=Zea mays GN=PIP2-7<br>PE=2 SV=1//0                               |
| Glyma.14G061500.Wm82.a2.v1 | -3.4944                  | 3.14E-256     | 5.83E-254     | sp P25794 PIP2_PEA Probable aquaporin PIP-type 7a OS=Pisum<br>sativum GN=TRG-31 PE=2 SV=2//0               |
| Glyma.19G181300.Wm82.a2.v1 | -1.8146                  | 2.39E-41      | 4.34E-40      | sp P43286 PIP21_ARATH Aquaporin PIP2-1 OS=Arabidopsis thaliana<br>GN=PIP2-1 PE=1 SV=1//1.21882e-159        |
| Glyma.20G179700.Wm82.a2.v1 | -1.2547                  | 1.07E-09      | 4.23E-09      | sp Q9SV31 PIP25_ARATH Probable aquaporin PIP2-5 OS=Arabidopsis                                             |

|                            |                   |          |          |                                                                                                           |
|----------------------------|-------------------|----------|----------|-----------------------------------------------------------------------------------------------------------|
|                            |                   |          |          | thaliana GN=PIP2-5 PE=1 SV=1//2.42474e-174                                                                |
| Glyma.01G208200.Wm82.a2.v1 | -3.2561           | 3.87E-05 | 7.96E-05 | sp P21653 TIP1_TOBAC Probable aquaporin TIP-type RB7-5A OS=Nicotiana tabacum PE=2 SV=1//8.56123e-108      |
| Glyma.03G185900.Wm82.a2.v1 | -3.9833           | 3.58E-49 | 7.75E-48 | sp Q9FY14 TIP1_MEDTR Probable aquaporin TIP-type OS=Medicago truncatula GN=AQP1 PE=1 SV=1//4.13105e-138   |
| Glyma.04G083200.Wm82.a2.v1 | -2.4955           | 5.31E-08 | 1.71E-07 | sp O82316 TIP41_ARATH Aquaporin TIP4-1 OS=Arabidopsis thaliana GN=TIP4-1 PE=2 SV=1//2.71385e-104          |
| Glyma.06G084600.Wm82.a2.v1 | -7.8808           | 5.20E-08 | 1.68E-07 | sp O82316 TIP41_ARATH Aquaporin TIP4-1 OS=Arabidopsis thaliana GN=TIP4-1 PE=2 SV=1//5.03132e-112          |
| Glyma.10G221100.Wm82.a2.v1 | 4.4345            | 1.72E-08 | 5.90E-08 | sp Q9SV84 NIP51_ARATH Probable aquaporin NIP5-1 OS=Arabidopsis thaliana GN=NIP5-1 PE=2 SV=1//9.09463e-136 |
| Glyma.11G034000.Wm82.a2.v1 | -7.0479           | 1.24E-57 | 3.10E-56 | sp Q41975 TIP22_ARATH Probable aquaporin TIP2-2 OS=Arabidopsis thaliana GN=TIP2-2 PE=1 SV=2//1.28753e-108 |
| Glyma.13G146300.Wm82.a2.v1 | -3.9189           | 6.20E-13 | 3.32E-12 | sp P25818 TIP11_ARATH Aquaporin TIP1-1 OS=Arabidopsis thaliana GN=TIP1-1 PE=1 SV=1//3.98186e-100          |
| Glyma.13G224900.Wm82.a2.v1 | -4.0888           | 6.06E-08 | 1.93E-07 | sp Q8LFP7 NIP12_ARATH Aquaporin NIP1-2 OS=Arabidopsis thaliana GN=NIP1-2 PE=2 SV=2//2.31568e-131          |
| Glyma.16G210000.Wm82.a2.v1 | 8.4148            | 1.80E-29 | 2.32E-28 | sp P23958 TIPA_PHAVU Probable aquaporin TIP-type alpha OS=Phaseolus vulgaris PE=1 SV=1//1.5688e-132       |
| Glyma.19G186100.Wm82.a2.v1 | -2.6303           | 2.21E-58 | 5.61E-57 | sp Q9FY14 TIP1_MEDTR Probable aquaporin TIP-type OS=Medicago truncatula GN=AQP1 PE=1 SV=1//1.79911e-139   |
| <b>S24P4L vs S24L</b>      |                   |          |          |                                                                                                           |
| Locus                      | log2.Fold_change. | pvalue   | qvalue   | Blast swiss prot                                                                                          |
| Glyma.02G255000.Wm82.a2.v1 | 1.9736            | 3.38E-84 | 3.88E-81 | sp P25794 PIP2_PEA Probable aquaporin PIP-type 7a OS=Pisum sativum GN=TRG-31 PE=2 SV=2//0                 |
| Glyma.03G078700.Wm82.a2.v1 | 1.4195            | 4.37E-06 | 0.000186 | sp Q39196 PIP14_ARATH Probable aquaporin PIP1-4 OS=Arabidopsis                                            |

|                            |                   |               | 6             | thaliana GN=PIP1.4 PE=1 SV=1//0                                                                                   |
|----------------------------|-------------------|---------------|---------------|-------------------------------------------------------------------------------------------------------------------|
| Glyma.10G211000.Wm82.a2.v1 | 4.0029            | 4.72E-76      | 4.87E-73      | sp P43287 PIP22_ARATH Aquaporin PIP2-2 OS=Arabidopsis thaliana GN=PIP2-2 PE=1 SV=2//3.46181e-175                  |
| Glyma.13G325900.Wm82.a2.v1 | 1.4467            | 3.06E-25      | 7.46E-23      | sp Q9ATM4 PIP27_MAIZE Aquaporin PIP2-7 OS=Zea mays GN=PIP2-7 PE=2 SV=1//0                                         |
| Glyma.14G061500.Wm82.a2.v1 | 1.2008            | 1.02E-85      | 1.20E-82      | sp P25794 PIP2_PEA Probable aquaporin PIP-type 7a OS=Pisum sativum GN=TRG-31 PE=2 SV=2//0                         |
| Glyma.16G155100.Wm82.a2.v1 | 3.5931            | 2.60E-06      | 0.000115<br>1 | sp P43287 PIP22_ARATH Aquaporin PIP2-2 OS=Arabidopsis thaliana GN=PIP2-2 PE=1 SV=2//3.48282e-165                  |
| Glyma.20G179700.Wm82.a2.v1 | 1.7429            | 1.13E-14      | 1.36E-12      | sp Q9SV31 PIP25_ARATH Probable aquaporin PIP2-5 OS=Arabidopsis thaliana GN=PIP2-5 PE=1 SV=1//2.42474e-174         |
| Glyma.03G185900.Wm82.a2.v1 | 1.1109            | 7.58E-14      | 8.41E-12      | sp Q9FY14 TIP1_MEDTR Probable aquaporin TIP-type OS=Medicago truncatula GN=AQP1 PE=1 SV=1//4.13105e-138           |
| Glyma.11G143100.Wm82.a2.v1 | 4.8672            | 1.73E-14      | 2.06E-12      | sp O82598 TIP13_ARATH Aquaporin TIP1-3 OS=Arabidopsis thaliana GN=TIP1-3 PE=1 SV=1//6.95573e-136                  |
| Glyma.13G333100.Wm82.a2.v1 | 2.8634            | 3.84E-16      | 4.97E-14      | sp O82598 TIP13_ARATH Aquaporin TIP1-3 OS=Arabidopsis thaliana GN=TIP1-3 PE=1 SV=1//1.6409e-139                   |
| <b>S24P4R vs S24R</b>      |                   |               |               |                                                                                                                   |
| Locus                      | log2.Fold_change. | pvalue        | qvalue        | Blast swiss prot                                                                                                  |
| Glyma.03G078700.Wm82.a2.v1 | 1.5271            | 0.000176<br>7 | 0.002433      | sp Q39196 PIP14_ARATH Probable aquaporin PIP1-4 OS=Arabidopsis thaliana GN=PIP1.4 PE=1 SV=1//0                    |
| Glyma.11G023200.Wm82.a2.v1 | -1.6612           | 9.01E-24      | 1.01E-21      | sp Q7XSQ9 PIP12_ORYSJ Probable aquaporin PIP1-2 OS=Oryza sativa subsp. japonica GN=PIP1-2 PE=2 SV=3//1.77595e-180 |
| Glyma.12G172500.Wm82.a2.v1 | -1.0375           | 4.25E-09      | 1.43E-07      | sp Q9ATM4 PIP27_MAIZE Aquaporin PIP2-7 OS=Zea mays GN=PIP2-7 PE=2 SV=1//0                                         |
| Glyma.13G325900.Wm82.a2.v1 | -1.5726           | 1.18E-124     | 1.58E-121     | sp Q9ATM4 PIP27_MAIZE Aquaporin PIP2-7 OS=Zea mays GN=PIP2-7                                                      |

|                            |                   |               |               |                                                                                                              |
|----------------------------|-------------------|---------------|---------------|--------------------------------------------------------------------------------------------------------------|
|                            |                   |               |               | PE=2 SV=1//0                                                                                                 |
| Glyma.16G155000.Wm82.a2.v1 | 1.8013            | 2.20E-07      | 5.70E-06      | sp P43287 PIP22_ARATH Aquaporin PIP2-2 OS=Arabidopsis thaliana<br>GN=PIP2-2 PE=1 SV=2//2.43539e-164          |
| Glyma.16G155100.Wm82.a2.v1 | 2.4703            | 1.20E-05      | 0.000218<br>7 | sp P43287 PIP22_ARATH Aquaporin PIP2-2 OS=Arabidopsis thaliana<br>GN=PIP2-2 PE=1 SV=2//3.48282e-165          |
| Glyma.01G208200.Wm82.a2.v1 | -1.5375           | 5.57E-84      | 3.40E-81      | sp P21653 TIP1_TOBAC Probable aquaporin TIP-type RB7-5A<br>OS=Nicotiana tabacum PE=2 SV=1//8.56123e-108      |
| Glyma.11G034000.Wm82.a2.v1 | -1.494            | 1.88E-75      | 9.91E-73      | sp Q41975 TIP22_ARATH Probable aquaporin TIP2-2 OS=Arabidopsis<br>thaliana GN=TIP2-2 PE=1 SV=2//1.28753e-108 |
| Glyma.11G143100.Wm82.a2.v1 | 1.5806            | 0.000115<br>9 | 0.001669<br>9 | sp O82598 TIP13_ARATH Aquaporin TIP1-3 OS=Arabidopsis thaliana<br>GN=TIP1-3 PE=1 SV=1//6.95573e-136          |
| Glyma.13G333100.Wm82.a2.v1 | 5.1343            | 4.70E-22      | 4.78E-20      | sp O82598 TIP13_ARATH Aquaporin TIP1-3 OS=Arabidopsis thaliana<br>GN=TIP1-3 PE=1 SV=1//1.6409e-139           |
| Glyma.19G186100.Wm82.a2.v1 | -1.1421           | 7.19E-119     | 8.07E-116     | sp Q9FY14 TIP1_MEDTR Probable aquaporin TIP-type OS=Medicago<br>truncatula GN=AQP1 PE=1 SV=1//1.79911e-139   |
| Glyma.09G238200.Wm82.a2.v1 | -5.6833           | 1.15E-78      | 6.44E-76      | sp Q6Z2T3 NIP21_ORYSJ Aquaporin NIP2-1 OS=Oryza sativa subsp.<br>japonica GN=NIP2-1 PE=1 SV=1//3.71203e-92   |
| Glyma.18G259500.Wm82.a2.v1 | -2.9387           | 1.15E-10      | 4.72E-09      | sp Q6Z2T3 NIP21_ORYSJ Aquaporin NIP2-1 OS=Oryza sativa subsp.<br>japonica GN=NIP2-1 PE=1 SV=1//1.04006e-92   |
| Glyma.19G108400.Wm82.a2.v1 | -1.2588           | 1.13E-13      | 6.26E-12      | sp Q9ATM2 SIP12_MAIZE Aquaporin SIP1-2 OS=Zea mays GN=SIP1-2<br>PE=2 SV=1//6.2894e-74                        |
| <b>S24P10L vs S24L</b>     |                   |               |               |                                                                                                              |
| Locus                      | log2.Fold_change. | pvalue        | qvalue        | Blast swiss prot                                                                                             |
| Glyma.02G255000.Wm82.a2.v1 | 1.4353            | 1.97E-30      | 2.14E-28      | sp P25794 PIP2_PEA Probable aquaporin PIP-type 7a OS=Pisum<br>sativum GN=TRG-31 PE=2 SV=2//0                 |
| Glyma.03G180900.Wm82.a2.v1 | 7.1822            | 7.94E-16      | 4.08E-14      | sp Q9ATM4 PIP27_MAIZE Aquaporin PIP2-7 OS=Zea mays GN=PIP2-7                                                 |

|                            |                   |               |               |                                                                                                              |
|----------------------------|-------------------|---------------|---------------|--------------------------------------------------------------------------------------------------------------|
|                            |                   |               |               | PE=2 SV=1//7.13148e-158                                                                                      |
| Glyma.10G211000.Wm82.a2.v1 | 2.814             | 3.89E-23      | 3.19E-21      | sp P43287 PIP22_ARATH Aquaporin PIP2-2 OS=Arabidopsis thaliana<br>GN=PIP2-2 PE=1 SV=2//3.46181e-175          |
| Glyma.16G155100.Wm82.a2.v1 | 3.2682            | 0.000111<br>8 | 0.001484<br>3 | sp P43287 PIP22_ARATH Aquaporin PIP2-2 OS=Arabidopsis thaliana<br>GN=PIP2-2 PE=1 SV=2//3.48282e-165          |
| Glyma.02G255000.Wm82.a2.v1 | 1.4353            | 1.97E-30      | 2.14E-28      | sp P25794 PIP2_PEA Probable aquaporin PIP-type 7a OS=Pisum<br>sativum GN=TRG-31 PE=2 SV=2//0                 |
| Glyma.19G181300.Wm82.a2.v1 | 1.6089            | 1.07E-36      | 1.53E-34      | sp P43286 PIP21_ARATH Aquaporin PIP2-1 OS=Arabidopsis thaliana<br>GN=PIP2-1 PE=1 SV=1//1.21882e-159          |
| Glyma.04G083200.Wm82.a2.v1 | -3.9144           | 3.74E-08      | 9.09E-07      | sp O82316 TIP41_ARATH Aquaporin TIP4-1 OS=Arabidopsis thaliana<br>GN=TIP4-1 PE=2 SV=1//2.71385e-104          |
| Glyma.06G084600.Wm82.a2.v1 | -3.3701           | 7.72E-08      | 1.80E-06      | sp O82316 TIP41_ARATH Aquaporin TIP4-1 OS=Arabidopsis thaliana<br>GN=TIP4-1 PE=2 SV=1//5.03132e-112          |
| Glyma.11G034000.Wm82.a2.v1 | -2.1254           | 1.34E-34      | 1.72E-32      | sp Q41975 TIP22_ARATH Probable aquaporin TIP2-2 OS=Arabidopsis<br>thaliana GN=TIP2-2 PE=1 SV=2//1.28753e-108 |
| Glyma.11G143100.Wm82.a2.v1 | 3.2988            | 0.000183<br>5 | 0.002303<br>1 | sp O82598 TIP13_ARATH Aquaporin TIP1-3 OS=Arabidopsis thaliana<br>GN=TIP1-3 PE=1 SV=1//6.95573e-136          |
| Glyma.13G333100.Wm82.a2.v1 | 1.9577            | 1.36E-05      | 0.000219<br>7 | sp O82598 TIP13_ARATH Aquaporin TIP1-3 OS=Arabidopsis thaliana<br>GN=TIP1-3 PE=1 SV=1//1.6409e-139           |
| Glyma.13G224900.Wm82.a2.v1 | -1.929            | 0.000214<br>6 | 0.002652<br>7 | sp Q8LFP7 NIP12_ARATH Aquaporin NIP1-2 OS=Arabidopsis thaliana<br>GN=NIP1-2 PE=2 SV=2//2.31568e-131          |
| <b>S24P10R vs S24R</b>     |                   |               |               |                                                                                                              |
| Locus                      | log2.Fold_change. | pvalue        | qvalue        | Blast swiss prot                                                                                             |
| Glyma.01G220600.Wm82.a2.v1 | -1.0456           | 5.90E-07      | 1.34E-05      | sp Q39196 PIP14_ARATH Probable aquaporin PIP1-4 OS=Arabidopsis<br>thaliana GN=PIP1.4 PE=1 SV=1//0            |
| Glyma.05G208700.Wm82.a2.v1 | -1.5477           | 1.53E-09      | 5.24E-08      | sp Q7XSQ9 PIP12_ORYSJ Probable aquaporin PIP1-2 OS=Oryza sativa                                              |

|                            |                   |           |               |                                                                                                                   |
|----------------------------|-------------------|-----------|---------------|-------------------------------------------------------------------------------------------------------------------|
|                            |                   |           |               | subsp. japonica GN=PIP1-2 PE=2 SV=3//0                                                                            |
| Glyma.11G023200.Wm82.a2.v1 | -1.1189           | 1.33E-15  | 8.09E-14      | sp Q7XSQ9 PIP12_ORYSJ Probable aquaporin PIP1-2 OS=Oryza sativa subsp. japonica GN=PIP1-2 PE=2 SV=3//1.77595e-180 |
| Glyma.11G146500.Wm82.a2.v1 | -1.2914           | 1.01E-06  | 2.22E-05      | sp Q9ATM4 PIP27_MAIZE Aquaporin PIP2-7 OS=Zea mays GN=PIP2-7 PE=2 SV=1//0                                         |
| Glyma.13G325900.Wm82.a2.v1 | -1.4212           | 2.08E-116 | 1.61E-113     | sp Q9ATM4 PIP27_MAIZE Aquaporin PIP2-7 OS=Zea mays GN=PIP2-7 PE=2 SV=1//0                                         |
| Glyma.01G208200.Wm82.a2.v1 | -2.1452           | 7.68E-132 | 7.48E-129     | sp P21653 TIP1_TOBAC Probable aquaporin TIP-type RB7-5A OS=Nicotiana tabacum PE=2 SV=1//8.56123e-108              |
| Glyma.04G083200.Wm82.a2.v1 | -1.474            | 2.51E-35  | 4.18E-33      | sp O82316 TIP41_ARATH Aquaporin TIP4-1 OS=Arabidopsis thaliana GN=TIP4-1 PE=2 SV=1//2.71385e-104                  |
| Glyma.08G203000.Wm82.a2.v1 | -1.985            | 4.72E-06  | 9.12E-05      | sp Q41951 TIP21_ARATH Aquaporin TIP2-1 OS=Arabidopsis thaliana GN=TIP2-1 PE=1 SV=2//7.86985e-112                  |
| Glyma.11G034000.Wm82.a2.v1 | -1.8039           | 5.70E-101 | 3.48E-98      | sp Q41975 TIP22_ARATH Probable aquaporin TIP2-2 OS=Arabidopsis thaliana GN=TIP2-2 PE=1 SV=2//1.28753e-108         |
| Glyma.19G186100.Wm82.a2.v1 | -1.0718           | 4.28E-119 | 3.43E-116     | sp Q9FY14 TIP1_MEDTR Probable aquaporin TIP-type OS=Medicago truncatula GN=AQP1 PE=1 SV=1//1.79911e-139           |
| Glyma.09G238200.Wm82.a2.v1 | -7.2272           | 9.14E-74  | 3.40E-71      | sp Q6Z2T3 NIP21_ORYSJ Aquaporin NIP2-1 OS=Oryza sativa subsp. japonica GN=NIP2-1 PE=1 SV=1//3.71203e-92           |
| Glyma.16G043800.Wm82.a2.v1 | 1.1158            | 2.22E-05  | 0.000368<br>9 | sp Q9ATM2 SIP12_MAIZE Aquaporin SIP1-2 OS=Zea mays GN=SIP1-2 PE=2 SV=1//1.074e-64                                 |
| Glyma.18G259500.Wm82.a2.v1 | -3.0228           | 4.15E-11  | 1.70E-09      | sp Q6Z2T3 NIP21_ORYSJ Aquaporin NIP2-1 OS=Oryza sativa subsp. japonica GN=NIP2-1 PE=1 SV=1//1.04006e-92           |
| <b>S24A1L vs S24L</b>      |                   |           |               |                                                                                                                   |
| Locus                      | log2.Fold_change. | pvalue    | qvalue        | Blast swiss prot                                                                                                  |
| Glyma.01G220600.Wm82.a2.v1 | 2.85              | 6.43E-07  | 1.23E-05      | sp Q39196 PIP14_ARATH Probable aquaporin PIP1-4 OS=Arabidopsis                                                    |

|                            |        |           |           |                                                                                                           |
|----------------------------|--------|-----------|-----------|-----------------------------------------------------------------------------------------------------------|
|                            |        |           |           | thaliana GN=PIP1.4 PE=1 SV=1//0                                                                           |
| Glyma.02G255000.Wm82.a2.v1 | 1.7729 | 2.59E-58  | 6.95E-56  | sp P25794 PIP2_PEA Probable aquaporin PIP-type 7a OS=Pisum sativum GN=TRG-31 PE=2 SV=2//0                 |
| Glyma.03G180900.Wm82.a2.v1 | 6.4452 | 1.44E-10  | 4.81E-09  | sp Q9ATM4 PIP27_MAIZE Aquaporin PIP2-7 OS=Zea mays GN=PIP2-7 PE=2 SV=1//7.13148e-158                      |
| Glyma.08G015300.Wm82.a2.v1 | 5.6265 | 1.71E-15  | 8.82E-14  | sp Q7XSQ9 PIP12_ORYSJ Probable aquaporin PIP1-2 OS=Oryza sativa subsp. japonica GN=PIP1-2 PE=2 SV=3//0    |
| Glyma.05G208700.Wm82.a2.v1 | 3.5809 | 2.30E-16  | 1.28E-14  | sp Q7XSQ9 PIP12_ORYSJ Probable aquaporin PIP1-2 OS=Oryza sativa subsp. japonica GN=PIP1-2 PE=2 SV=3//0    |
| Glyma.10G211000.Wm82.a2.v1 | 2.0977 | 9.87E-11  | 3.34E-09  | sp P43287 PIP22_ARATH Aquaporin PIP2-2 OS=Arabidopsis thaliana GN=PIP2-2 PE=1 SV=2//3.46181e-175          |
| Glyma.11G146500.Wm82.a2.v1 | 3.1783 | 6.24E-07  | 1.20E-05  | sp Q9ATM4 PIP27_MAIZE Aquaporin PIP2-7 OS=Zea mays GN=PIP2-7 PE=2 SV=1//0                                 |
| Glyma.12G075400.Wm82.a2.v1 | 2.3425 | 1.19E-38  | 1.89E-36  | sp Q9ATM4 PIP27_MAIZE Aquaporin PIP2-7 OS=Zea mays GN=PIP2-7 PE=2 SV=1//7.87722e-176                      |
| Glyma.12G172500.Wm82.a2.v1 | 1.0966 | 1.02E-07  | 2.25E-06  | sp Q9ATM4 PIP27_MAIZE Aquaporin PIP2-7 OS=Zea mays GN=PIP2-7 PE=2 SV=1//0                                 |
| Glyma.13G325900.Wm82.a2.v1 | 1.2707 | 1.42E-16  | 8.00E-15  | sp Q9ATM4 PIP27_MAIZE Aquaporin PIP2-7 OS=Zea mays GN=PIP2-7 PE=2 SV=1//0                                 |
| Glyma.14G061500.Wm82.a2.v1 | 1.0535 | 8.51E-54  | 2.04E-51  | sp P25794 PIP2_PEA Probable aquaporin PIP-type 7a OS=Pisum sativum GN=TRG-31 PE=2 SV=2//0                 |
| Glyma.19G181300.Wm82.a2.v1 | 2.5944 | 1.80E-154 | 1.79E-151 | sp P43286 PIP21_ARATH Aquaporin PIP2-1 OS=Arabidopsis thaliana GN=PIP2-1 PE=1 SV=1//1.21882e-159          |
| Glyma.20G179700.Wm82.a2.v1 | 1.5905 | 6.58E-11  | 2.26E-09  | sp Q9SV31 PIP25_ARATH Probable aquaporin PIP2-5 OS=Arabidopsis thaliana GN=PIP2-5 PE=1 SV=1//2.42474e-174 |
| Glyma.03G185900.Wm82.a2.v1 | 3.0357 | 1.05E-211 | 1.82E-208 | sp Q9FY14 TIP1_MEDTR Probable aquaporin TIP-type OS=Medicago                                              |

|                            |                   |           |               |                                                                                                           |
|----------------------------|-------------------|-----------|---------------|-----------------------------------------------------------------------------------------------------------|
|                            |                   |           |               | truncatula GN=AQP1 PE=1 SV=1//4.13105e-138                                                                |
| Glyma.07G018000.Wm82.a2.v1 | 4.7891            | 2.60E-13  | 1.13E-11      | sp Q41951 TIP21_ARATH Aquaporin TIP2-1 OS=Arabidopsis thaliana GN=TIP2-1 PE=1 SV=2//9.26677e-112          |
| Glyma.08G203000.Wm82.a2.v1 | 2.5759            | 9.56E-05  | 0.001159      | sp Q41951 TIP21_ARATH Aquaporin TIP2-1 OS=Arabidopsis thaliana GN=TIP2-1 PE=1 SV=2//7.86985e-112          |
| Glyma.11G034000.Wm82.a2.v1 | 1.0229            | 4.45E-13  | 1.90E-11      | sp Q41975 TIP22_ARATH Probable aquaporin TIP2-2 OS=Arabidopsis thaliana GN=TIP2-2 PE=1 SV=2//1.28753e-108 |
| Glyma.15G018100.Wm82.a2.v1 | 5.3221            | 2.62E-23  | 2.29E-21      | sp Q41951 TIP21_ARATH Aquaporin TIP2-1 OS=Arabidopsis thaliana GN=TIP2-1 PE=1 SV=2//3.77304e-115          |
| Glyma.19G186100.Wm82.a2.v1 | 3.1099            | 0         | 0             | sp Q9FY14 TIP1_MEDTR Probable aquaporin TIP-type OS=Medicago truncatula GN=AQP1 PE=1 SV=1//1.79911e-139   |
| Glyma.06G307000.Wm82.a2.v1 | 2.6283            | 4.46E-05  | 0.000587<br>3 | sp Q9ATM2 SIP12_MAIZE Aquaporin SIP1-2 OS=Zea mays GN=SIP1-2 PE=2 SV=1//7.29961e-66                       |
| <b>S24A1R vs S24R</b>      |                   |           |               |                                                                                                           |
| Locus                      | log2.Fold_change. | pvalue    | qvalue        | Blast swiss prot                                                                                          |
| Glyma.02G255000.Wm82.a2.v1 | 1.2037            | 3.02E-111 | 7.42E-108     | sp P25794 PIP2_PEA Probable aquaporin PIP-type 7a OS=Pisum sativum GN=TRG-31 PE=2 SV=2//0                 |
| Glyma.16G155000.Wm82.a2.v1 | 1.4911            | 8.41E-06  | 0.000441<br>1 | sp P43287 PIP22_ARATH Aquaporin PIP2-2 OS=Arabidopsis thaliana GN=PIP2-2 PE=1 SV=2//2.43539e-164          |
| Glyma.09G238200.Wm82.a2.v1 | -1.9697           | 1.01E-34  | 5.32E-32      | sp Q6Z2T3 NIP21_ORYSJ Aquaporin NIP2-1 OS=Oryza sativa subsp. japonica GN=NIP2-1 PE=1 SV=1//3.71203e-92   |
| Glyma.19G108400.Wm82.a2.v1 | -1.0846           | 9.63E-10  | 9.73E-08      | sp Q9ATM2 SIP12_MAIZE Aquaporin SIP1-2 OS=Zea mays GN=SIP1-2 PE=2 SV=1//6.2894e-74                        |
| <b>S24A3L vs S24L</b>      |                   |           |               |                                                                                                           |
| Locus                      | log2.Fold_change. | pvalue    | qvalue        | Blast swiss prot                                                                                          |
| Glyma.03G180900.Wm82.a2.v1 | 6.7068            | 1.76E-13  | 1.44E-11      | sp Q9ATM4 PIP27_MAIZE Aquaporin PIP2-7 OS=Zea mays GN=PIP2-7                                              |



|                            |                   |          |          | PE=2 SV=1//7.13148e-158                                                                                 |
|----------------------------|-------------------|----------|----------|---------------------------------------------------------------------------------------------------------|
| Glyma.05G208700.Wm82.a2.v1 | 3.0156            | 1.63E-11 | 1.11E-09 | sp Q7XSQ9 PIP12_ORYSJ Probable aquaporin PIP1-2 OS=Oryza sativa subsp. japonica GN=PIP1-2 PE=2 SV=3//0  |
| Glyma.08G015300.Wm82.a2.v1 | 4.6566            | 3.94E-09 | 2.04E-07 | sp Q7XSQ9 PIP12_ORYSJ Probable aquaporin PIP1-2 OS=Oryza sativa subsp. japonica GN=PIP1-2 PE=2 SV=3//0  |
| Glyma.12G075400.Wm82.a2.v1 | 1.5905            | 2.01E-17 | 2.31E-15 | sp Q9ATM4 PIP27_MAIZE Aquaporin PIP2-7 OS=Zea mays GN=PIP2-7 PE=2 SV=1//7.87722e-176                    |
| Glyma.19G181300.Wm82.a2.v1 | 1.9465            | 1.08E-83 | 8.12E-81 | sp P43286 PIP21_ARATH Aquaporin PIP2-1 OS=Arabidopsis thaliana GN=PIP2-1 PE=1 SV=1//1.21882e-159        |
| Glyma.03G185900.Wm82.a2.v1 | 1.6317            | 1.03E-44 | 3.33E-42 | sp Q9FY14 TIP1_MEDTR Probable aquaporin TIP-type OS=Medicago truncatula GN=AQP1 PE=1 SV=1//4.13105e-138 |
| Glyma.07G018000.Wm82.a2.v1 | 3.7763            | 2.79E-07 | 1.07E-05 | sp Q41951 TIP21_ARATH Aquaporin TIP2-1 OS=Arabidopsis thaliana GN=TIP2-1 PE=1 SV=2//9.26677e-112        |
| Glyma.15G018100.Wm82.a2.v1 | 4.2759            | 1.73E-12 | 1.29E-10 | sp Q41951 TIP21_ARATH Aquaporin TIP2-1 OS=Arabidopsis thaliana GN=TIP2-1 PE=1 SV=2//3.77304e-115        |
| Glyma.19G186100.Wm82.a2.v1 | 1.3203            | 3.59E-36 | 8.72E-34 | sp Q9FY14 TIP1_MEDTR Probable aquaporin TIP-type OS=Medicago truncatula GN=AQP1 PE=1 SV=1//1.79911e-139 |
| <b>S24A3R vs S24R</b>      |                   |          |          |                                                                                                         |
| Locus                      | log2.Fold_change. | pvalue   | qvalue   | Blast swiss prot                                                                                        |
| Glyma.10G211000.Wm82.a2.v1 | -1.2424           | 2.93E-15 | 2.64E-13 | sp P43287 PIP22_ARATH Aquaporin PIP2-2 OS=Arabidopsis thaliana GN=PIP2-2 PE=1 SV=2//3.46181e-175        |
| Glyma.01G208200.Wm82.a2.v1 | -1.8079           | 8.46E-97 | 8.56E-94 | sp P21653 TIP1_TOBAC Probable aquaporin TIP-type RB7-5A OS=Nicotiana tabacum PE=2 SV=1//8.56123e-108    |
| Glyma.03G185900.Wm82.a2.v1 | -1.1135           | 4.80E-98 | 5.24E-95 | sp Q9FY14 TIP1_MEDTR Probable aquaporin TIP-type OS=Medicago truncatula GN=AQP1 PE=1 SV=1//4.13105e-138 |
| Glyma.04G083200.Wm82.a2.v1 | -2.1545           | 3.31E-50 | 1.45E-47 | sp O82316 TIP41_ARATH Aquaporin TIP4-1 OS=Arabidopsis thaliana                                          |

|                            |         |               |               |                                                                                                              |
|----------------------------|---------|---------------|---------------|--------------------------------------------------------------------------------------------------------------|
|                            |         |               |               | GN=TIP4-1 PE=2 SV=1//2.71385e-104                                                                            |
| Glyma.06G084600.Wm82.a2.v1 | -1.6221 | 1.78E-11      | 1.13E-09      | sp O82316 TIP41_ARATH Aquaporin TIP4-1 OS=Arabidopsis thaliana<br>GN=TIP4-1 PE=2 SV=1//5.03132e-112          |
| Glyma.07G018000.Wm82.a2.v1 | 1.4453  | 6.43E-07      | 2.33E-05      | sp Q41951 TIP21_ARATH Aquaporin TIP2-1 OS=Arabidopsis thaliana<br>GN=TIP2-1 PE=1 SV=2//9.26677e-112          |
| Glyma.11G034000.Wm82.a2.v1 | -1.3318 | 1.20E-58      | 6.71E-56      | sp Q41975 TIP22_ARATH Probable aquaporin TIP2-2 OS=Arabidopsis thaliana<br>GN=TIP2-2 PE=1 SV=2//1.28753e-108 |
| Glyma.09G238200.Wm82.a2.v1 | -5.1685 | 9.41E-78      | 7.36E-75      | sp Q6Z2T3 NIP21_ORYSJ Aquaporin NIP2-1 OS=Oryza sativa subsp. japonica<br>GN=NIP2-1 PE=1 SV=1//3.71203e-92   |
| Glyma.15G003900.Wm82.a2.v1 | 1.9064  | 0.000114<br>2 | 0.002593<br>7 | sp Q9SAI4 NIP61_ARATH Aquaporin NIP6-1 OS=Arabidopsis thaliana<br>GN=NIP6-1 PE=1 SV=1//2.87757e-112          |
| Glyma.18G259500.Wm82.a2.v1 | -2.1677 | 8.39E-08      | 3.47E-06      | sp Q6Z2T3 NIP21_ORYSJ Aquaporin NIP2-1 OS=Oryza sativa subsp. japonica<br>GN=NIP2-1 PE=1 SV=1//1.04006e-92   |

**Table S10.**The information of all primers in the manuscript.

|           |                                        |
|-----------|----------------------------------------|
| SYP24-F1  | ACATCATTTCCTCCACTCCCG                  |
| SYP24-R1  | GGACCTATGTCCAAAAGTAACCA                |
| SYP24-F2  | TCTGGCTCATAGTCCGTCCG                   |
| SYP24-R2  | GCCTCTTGTTGGGGTTTCG                    |
| SYP24-F3  | cgacgacaagaccgtgACATCATTTCCTCCACTCCCG  |
| SYP24-R3  | gaggagaagagccgtGGACCTATGTCCAAAAGTAACCA |
| Atactin-F | GAAGTTCAATGTTTCGTTTCATGT               |
| Atactin-R | GGATTATACAAGGCCCCAAAA                  |
| Gmactin-F | ATCTTGACTGAGCGTGGTTATTCC               |
| Gmactin-R | GCTGGTCCTGGCTGTCTCC                    |
| RD29AF    | GGCGTAACAGGTAAACCTAGAG                 |
| RD29AR    | TCCGATGTAAACGTCGTCC                    |
| RD22F     | GGTTCGGAAGAAGCGGAG                     |
| RD22R     | GAAACAGCCCTGACGTGATAT                  |
| COR47F    | GGAGTACAAGAACAACGTTCCCGA               |
| COR47R    | TGTCGTCGCTGGTGATTCTCT                  |
| NCED3F    | CAGCTTGTAGCTTTTGGGCTGTA                |
| NCED3R    | TAACAGAAACCAGCTGAGCTCGA                |
| COR15AF   | GGCCACAAAGAAAGCTTCAG                   |
| COR15AR   | CTTGTTTGCGGCTTCTTTTC                   |
| KIN1F     | AACAAGAATGCCTTCCAAGC                   |
| KIN1R     | CGCATCCGATACACTCTTTCC                  |
| P5CSF     | GCGCATAGTTTCTGATGCAA                   |
| P5CSR     | TGCAACTTCGTGATCCTCTG                   |
| ABI1F     | AGAGTGTGCCTTTGTATGGTTTTA               |
| ABI1R     | CATCCTCTCTTACAATAGTTCGCT               |
| ABI2F     | GATGGAAGATTCTGTCTCAACGATT              |
| ABI2R     | GTTTCTCCTTCACTATCTCCTCCG               |
| ABI4F     | ACTCCAAGTTCGGTTACCGTG                  |
| ABI4R     | GGGGTTAAGTTGAGCTGAGCA                  |
| ABI5F     | CAATAAGAGAGGGATAGCGAACGAG              |
| ABI5R     | CGTCCATTGCTGTCTCCTCCA                  |
| ABF4F     | AACAACCTAGGAGGTGGTGGTC                 |
| ABF4R     | CTTCAGGAGTTCATCCATGTT                  |
| ABA3F     | TGCACACAACGTCACCTTCCATATA              |
| ABA3R     | GACCGTAGCTCAGAATGGGATAACT              |
| CIPK3F    | AGAATCTTAGATCCGAATCCGATGAC             |
| CIPK3R    | CCTCCTCTCAATGTTATCCTGTTTC              |
| RGALF     | CCCGGTTCCATCGATAAGTTTT                 |
| RGALR     | TCGCATGCCACAAGGTTTAGTAT                |
| IAA28F    | ACCAATTCACCTCCAACAACAAC                |
| IAA28R    | CTTGCCATGTTTCTAGGTGAG                  |

|            |                      |
|------------|----------------------|
| Cu/Zn SODF | ATGGCGAAAGGAGTTGCAGT |
| Cu/Zn SODR | TTAGCCCTGGAGACCAATGA |
